# Supplementary material for: Transcriptomic Features of Bovine Blastocysts Derived by Somatic Cell Nuclear Transfer
Source: Oxford University Press journal article supplement (doi:10.1534/g3.115.020016), 2015-09-16
Supplement: 020016_figures1.pdf [file 020016_figures1.pdf]

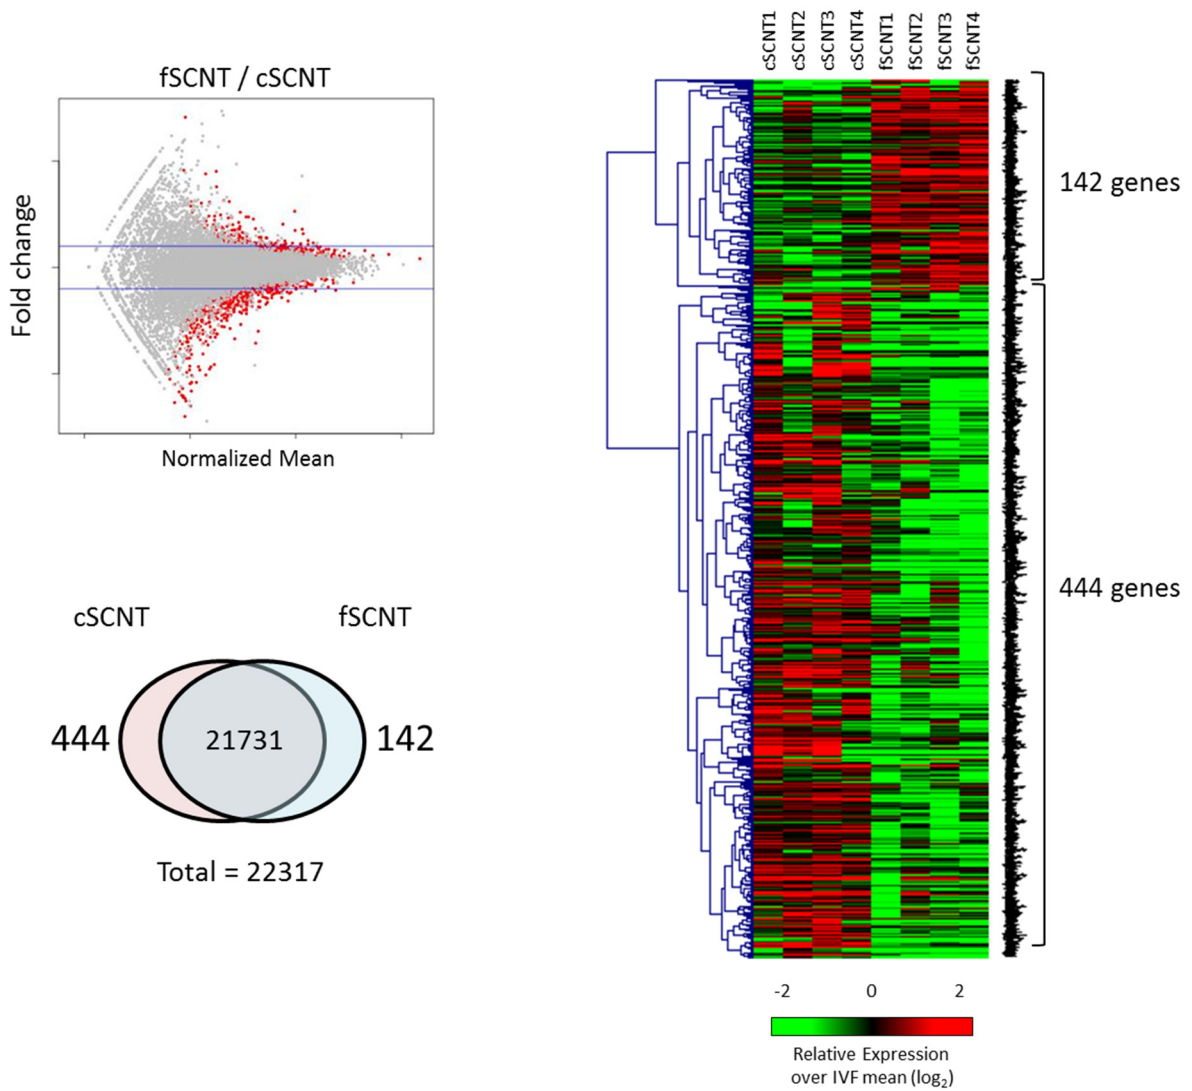

**Figure S1** Differentially expressed genes (fold change of  $>2$  and  $p < 0.05$ ) between cSCNT and fSCNT blastocysts. A, DESeq analysis. B, Venn diagrams. C, Heatmap
