# Supplementary material for: Transcriptomic Features of Bovine Blastocysts Derived by Somatic Cell Nuclear Transfer
Source: Oxford University Press journal article supplement (doi:10.1534/g3.115.020016), 2015-09-16
Supplement: 020016_figures3.pdf [file 020016_figures3.pdf]

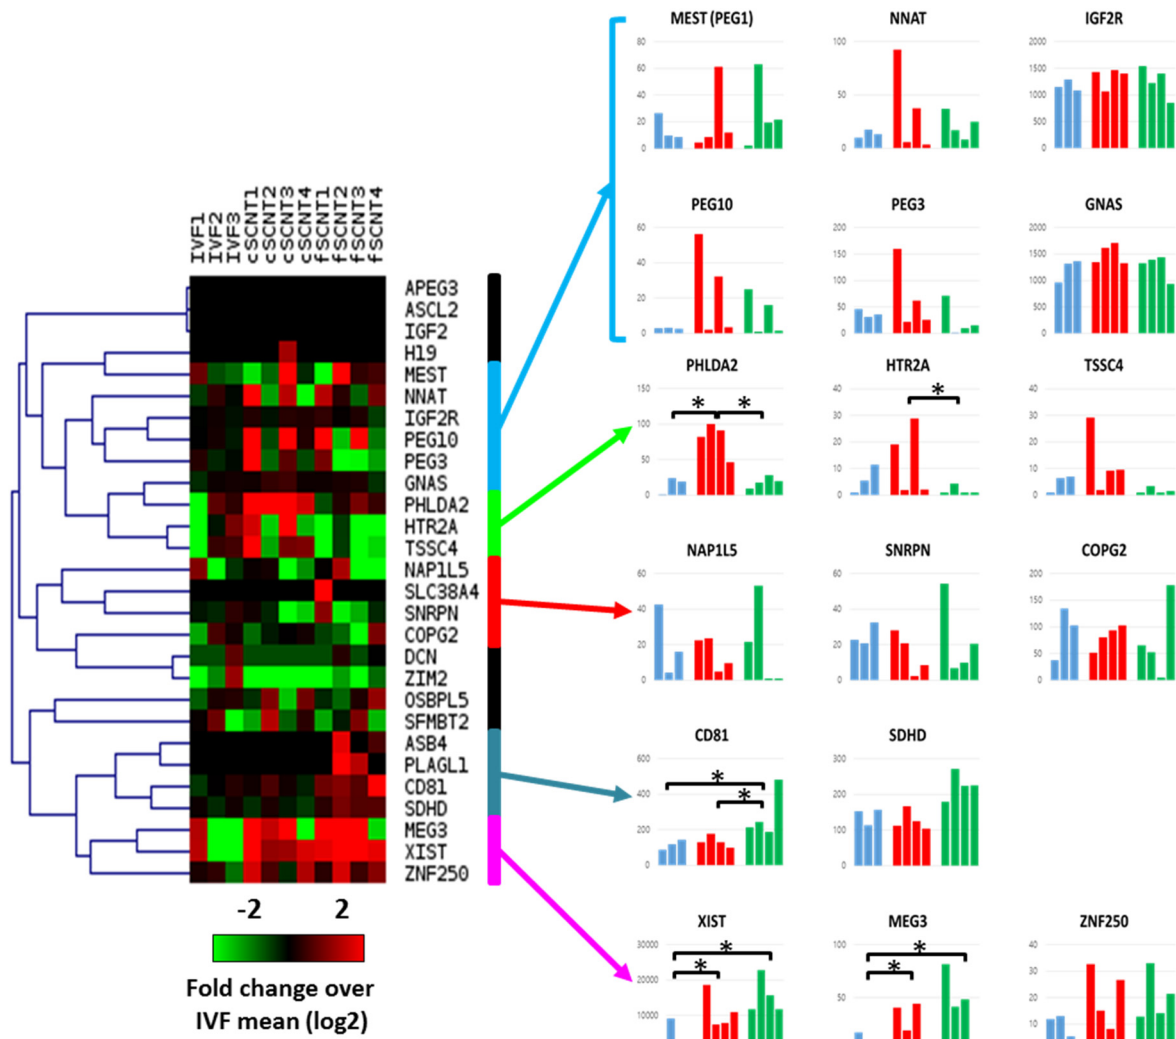

**Figure S3** Expression profiles of imprinting genes. Heatmap displays relative expressions in individual blastocysts against IVF mean. Detailed expression differences of selected genes among individual blastocysts are shown as bar charts on the right.
