# Supplementary material for: Transcriptomic Features of Bovine Blastocysts Derived by Somatic Cell Nuclear Transfer
Source: PubMed Central journal article supplement (PMC4683625; doi:10.1534/g3.115.020016), 2015-09-03
Supplement: supp_g3.115.020016_FigureS2.pdf [file supp_g3.115.020016_FigureS2.pdf]

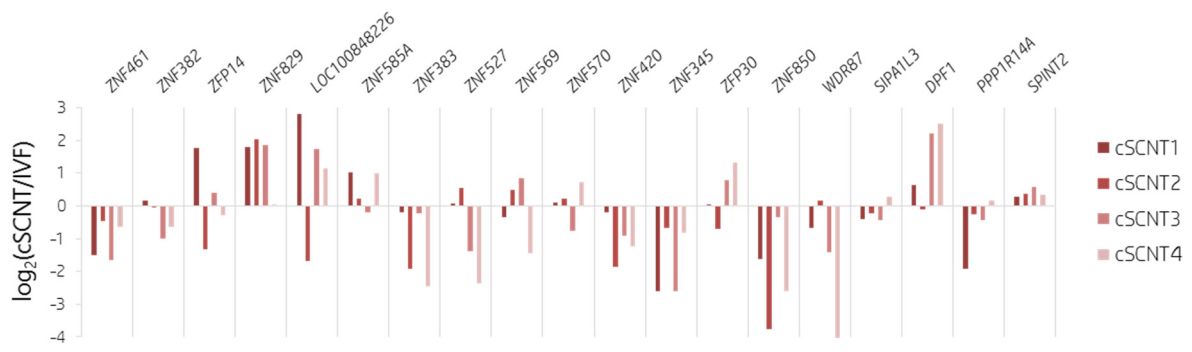

**Figure S2** Individual cSCNT expression profiles against IVF mean at the zinc-finger protein gene cluster.
