# Supplementary material for: Transcriptomic Features of Bovine Blastocysts Derived by Somatic Cell Nuclear Transfer
Source: G3 (Bethesda). 2015 Sep 3;5(12):2527–38. doi: 10.1534/g3.115.020016 (PMC4683625; doi:10.1534/g3.115.020016)
Supplement: Supporting Information [file supp_g3.115.020016_FileS1.xlsx]

## Sheet: Sheet1
ID	i1	i2	i3	c1	c2	c3	c4	f1	f2	f3	f4	NCBI_chr	NCBI_start	NCBI_end	Description
CLIC6	1	3.20916	1	1	3.83295	2.44315	3.45202	1	1	1.8788	1	1	124852	179713	chloride intracellular channel 6
RCAN1	140.492	118.085	237.007	223.185	119.04	154.455	119.923	348.05	140.595	149.518	7.35509	1	351787	361308	regulator of calcineurin 1
KCNE1	1	1	1	1	1	1	1	1	1	1	1	1	407122	407512	potassium voltage-gated channel, Isk-related family, member 1
MGC134427	1	1	1	1	1	1	1	1	1	1	1	1	460010	460766	uncharacterized protein MGC134427
KCNE2	1	1	1	1	1	1	1	1	1	1	1	1	484913	485285	potassium voltage-gated channel, Isk-related family, member 2
MRPS6	39.0432	34.1374	46.0969	50.6251	50.1046	103.945	32.8762	42.3414	56.5014	45.819	32.7755	1	670291	733588	mitochondrial ribosomal protein S6
SLC5A3	164.042	123.608	158.839	209.651	195.53	243.93	189.805	139.167	354.191	318.248	183.831	1	709486	711643	sodium/myo-inositol cotransporter-like
ATP5O	97.0137	186.569	215.962	162.282	125.65	126.554	157.929	140.255	229.733	179.397	255.693	1	922664	929925	ATP synthase, H+ transporting, mitochondrial F1 complex, O subunit
ITSN1	4696.61	2242.19	3070.59	1363.43	1138.9	1647.15	1479.57	1614.4	2271.51	2880.84	2074.23	1	944293	1114163	intersectin 1 (SH3 domain protein)
CRYZL1	131.434	90.4709	86.6841	48.3694	135.093	70.2712	36.5542	44.5173	59.8652	33.5158	54.285	1	1197956	1222558	crystallin, zeta (quinone reductase)-like 1
DONSON	33.6084	24.1962	43.0904	20.1733	30.2739	23.1283	31.6502	7.52759	22.8642	73.9407	23.9761	1	1223604	1233011	downstream neighbor of SON
SON	5535.37	6319.19	5451.71	5309.76	4249.49	4529.12	4564.2	4000.24	4086.24	4529.48	4077.55	1	1234655	1264713	SON DNA binding protein
GART	232.882	168.896	110.736	188.222	209.694	189.09	86.8206	185.948	180.118	80.0924	148.634	1	1268519	1291437	phosphoribosylglycinamide formyltransferase, phosphoribosylglycinamide synthetase, phosphoribosylami
TMEM50B	2.81158	3.20916	7.01292	2.12784	11.3875	4.36735	8.35605	2.08793	7.72745	1	1.97771	1	1343015	1359948	transmembrane protein 50B
IFNGR2	1	1	19.0388	2.12784	7.61023	25.5335	7.13004	1	1	15.0609	1	1	1376778	1407251	interferon gamma receptor 2 (interferon gamma transducer 1)
IFNAR1	241.94	261.681	306.156	132.958	127.539	227.574	219.229	241.433	101.071	186.428	73.3503	1	1469125	1495964	interferon (alpha, beta and omega) receptor 1
IL10RB	118.753	63.961	31.0646	111.529	84.1	127.035	73.3345	125.024	38.8419	192.579	32.2866	1	1563991	1591698	interleukin 10 receptor, beta
IFNAR2	10.0579	1	1	1	1.94432	8.6968	1	2.08793	1	1	1	1	1594101	1615172	interferon (alpha, beta and omega) receptor 2
LOC526226	1	1	1	1	1	1	1	1	1	1	1	1	1675215	1675527	histone cluster 1, H4i-like
OLIG1	1	1	1	1	1	1	1	1	1	1	1	1	1776498	1777299	oligodendrocyte transcription factor 1
LOC100848368	1	1	1	1	1	1	1	1	1	1	1	1	1784887	1790183	uncharacterized LOC100848368
LOC100848215	1	1	1	12.2784	1	1	1	1	1	1	1	1	1899512	1899513	uncharacterized LOC100848215
C1H21orf62	1	1	1	12.2784	1	1	1	1	1	1	1	1	2047638	2048295	chromosome 1 open reading frame, human C21orf62
GCFC1	1084.32	874.722	1003.65	969.817	674.299	904.412	612.778	1249.95	877.25	908.805	924.933	1	2067050	2098018	GC-rich sequence DNA-binding factor 1
SYNJ1	598.821	913.382	551.182	355.143	648.802	426.248	517.149	385.04	754.474	405.25	358.352	1	2109218	2193231	synaptojanin 1
C1H21orf59	238.317	145.7	202.433	134.085	164.367	143.872	262.14	117.409	107.798	21.2125	183.342	1	2205122	2216327	chromosome 1 open reading frame, human C21orf59
URB1	164.042	298.132	298.639	187.094	150.202	146.758	172.641	315.412	189.369	329.673	241.027	1	2382872	2459367	URB1 ribosome biogenesis 1 homolog (S. cerevisiae)
MRAP	1	1	1	1	1	1	1	1	1	1	1	1	2463138	2476901	melanocortin 2 receptor accessory protein
MIS18A	191.216	400.858	468.504	599.885	376.839	92.8805	269.496	83.6828	104.434	305.066	89.4825	1	2490276	2502139	MIS18 kinetochore protein homolog A (S. pombe)
HUNK	2.81158	2.10458	1	11.1506	8.55455	6.7726	9.58206	1	3.52279	27.3641	29.3535	1	2781251	2918051	hormonally up-regulated Neu-associated kinase
SCAF4	517.3	695.78	675.95	538.981	588.366	993.887	661.818	983.402	761.202	946.593	590.557	1	3050301	3111486	SR-related CTD-associated factor 4
SOD1	1685.77	1147.55	2216.76	3202.95	1152.12	5749.55	3460.79	4817.27	3367.25	3230.61	2676.98	1	3114266	3122534	superoxide dismutase 1, soluble
TIAM1	2455.69	2495.14	2433.23	2101.04	2809.4	1672.65	2434.63	1236.89	2275.72	2619.84	2330.88	1	3563941	3721930	T-cell lymphoma invasion and metastasis 1
MIR2284I	1	1	1	1	1	1	1	1	1	1	1	1	3580285	3580286	microRNA mir-2284i
KRTAP11-1	1	1	1	1	1	1	1	1	1	1	1	1	3972191	3972671	keratin associated protein 11-1
KRTAP7-1	1	1	1	1	1	1	1	1	1	1	1	1	4036041	4036305	keratin associated protein 7-1
LOC781919	1	1	1	1	1	1	1	1	1	1	1	1	4144946	4145219	uncharacterized LOC781919
LOC100296664	1	1	1	1	1	1	1	1	1	1	1	1	4156866	4157136	uncharacterized LOC100296664
LOC781858	1	1	1	1	1	1	1	1	1	1	1	1	4167772	4168045	uncharacterized LOC781858
LOC100336553	1	1	1	1	1	1	1	1	1	1	1	1	4201437	4201731	uncharacterized LOC100336553
LOC100301407	1	1	1	1	1	1	1	1	1	1	1	1	4213385	4213658	uncharacterized LOC100301407
LOC100298233	1	1	1	1	1	1	1	1	1	1	1	1	4225342	4225612	uncharacterized LOC100298233
LOC785105	1	1	1	1	1	1	1	1	1	1	1	1	4241802	4242117	uncharacterized LOC785105
LOC100296558	1	1	1	1	1	1	1	1	1	1	1	1	4257455	4257749	uncharacterized LOC100296558
LOC782990	1	1	1	1	1	1	1	1	1	1	1	1	4279126	4443782	uncharacterized LOC782990
LOC785259	1	1	1	1	1	1	1	1	1	1	1	1	4476817	4481258	uncharacterized LOC785259
KRTAP6-3	1	2.10458	1	1	1	1	1	1	1	1	1	1	4486994	4491518	keratin associated protein 6-3
LOC618359	1	1	1	1	1	1	1	1	1	1	1	1	4498235	4498490	uncharacterized LOC618359
LOC783140	1	1	1	1	1	1	1	1	1	1	1	1	4601103	4601277	uncharacterized LOC783140
LOC100296833	1	1	1	1	1	1	1	1	1	1	1	1	4614408	4614582	uncharacterized LOC100296833
LOC783287	1	1	1	1	1	1	1	1	1	1	1	1	4660512	4660734	uncharacterized LOC783287
LOC100296223	1	1	1	1	1	1	1	1	1	1	1	1	4693603	4693825	uncharacterized LOC100296223
LOC100296266	1	1	1	1	1	1	1	1	1	1	1	1	4713209	4713431	uncharacterized LOC100296266
LOC100337313	1	1	1	1	1	1	1	1	1	1	1	1	4728380	4728602	uncharacterized LOC100337313
LOC783565	1	1	1	1	1	1	1	1	1	1	1	1	4755608	4755609	serine/arginine repetitive matrix 1 pseudogene
KRTAP15-1	1	1	1	1	1	1	1	1	1	1	1	1	4771484	4771895	keratin associated protein 15-1
KRTAP13-1	1	1	1	1	1	1	1	1	1	1	1	1	4775187	4775682	keratin associated protein 13-1
KRTAP13-3	1	1	1	1	1	1	1	1	1	1	1	1	4787184	4787655	keratin associated protein 13-3
KRTAP13-2	1	1	1	1	1	1	1	1	1	1	1	1	4846914	4847475	keratin associated protein 13-2
LOC100297089	1	1	1	1	1	1	1	1	1	1	1	1	4849100	4879705	uncharacterized LOC100297089
KRTAP27-1	1	1	1	1	1	1	1	1	1	1	1	1	4893264	4893936	keratin associated protein 27-1
KRTAP26-1	1	1	1	1	1	1	1	1	1	1	1	1	4918608	4919151	keratin associated protein 26-1
KRTAP24-1	1	1	1	1	1	1	1	1	1	1	1	1	4955363	4956326	keratin associated protein 24-1
CLDN8	15.4926	4.31374	20.542	26.9404	27.4409	1	13.2601	10.7914	27.9098	9.78804	1	1	5035956	5036634	claudin 8
CLDN17	1	1	1	1	1	1	1	1	1	1	1	1	5095765	5096443	claudin 17
LOC100847531	1	1	1	1	1	1	1	1	1	1	1	1	5448095	5889269	glutamate receptor ionotropic, kainate 1-like
GRIK1	1	1	1	1	1	1	1	1	1	1	1	1	5877465	5891960	glutamate receptor, ionotropic, kainate 1
BACH1	468.387	625.087	387.33	804.024	544.927	312.239	520.827	358.93	357.555	367.461	425.814	1	6157624	6174155	BTB and CNC homology 1, basic leucine zipper transcription factor 1
C1H21orf7	1	1	1	1	1	1	1	1	1	1	1	1	6367307	6415130	chromosome 1 open reading frame, human C21orf7
CCT8	111.506	98.203	115.245	148.747	161.534	145.796	162.833	229.466	217.119	228.61	271.336	1	6475536	6489059	chaperonin containing TCP1, subunit 8 (theta)
USP16	843.384	778.624	923.983	959.667	883.938	828.406	869.014	927.918	768.77	1089.84	937.643	1	6490958	6514239	ubiquitin specific peptidase 16
RWDD2B	46.2895	38.5557	56.6195	44.9859	55.7705	68.828	53.7183	24.9345	66.5926	50.213	63.0844	1	6529979	6532969	RWD domain containing 2B
LTN1	328.896	458.296	512.098	534.47	272.019	320.898	325.892	269.719	351.668	196.973	157.922	1	6546057	6603442	listerin E3 ubiquitin protein ligase 1
LOC615183	1	1	1	1	1	1	1	1	1	1	1	1	6609162	6609531	histone H2B 7-like
LOC526789	1	1	1	1	1	1	1	1	1	1	1	1	8328038	8328350	histone cluster 1, H4i-like
ADAMTS5	1	1	1	1	1	1.48105	1	2.08793	1	1	1	1	8811791	8861602	ADAM metallopeptidase with thrombospondin type 1 motif, 5
ADAMTS1	6.43474	15.3595	94.2002	51.7529	57.6591	24.0904	27.9722	69.5397	9.40931	26.4853	32.7755	1	8955587	8962939	ADAM metallopeptidase with thrombospondin type 1 motif, 1
CYYR1	1	1	1	1	1	1	1	1	1	40.5462	1	1	9249180	9358866	cysteine/tyrosine-rich 1
APP	55.3474	120.295	1343.38	1107.41	1043.53	2993.61	585.806	2647.94	824.271	590.678	21.5318	1	9607517	9920136	amyloid beta (A4) precursor protein
GABPA	417.663	384.289	406.872	341.609	260.688	206.408	251.106	225.114	296.167	360.431	419.458	1	10034468	10061286	GA binding protein transcription factor, alpha subunit 60kDa
ATP5J	740.124	776.415	1305.8	1071.32	713.016	705.738	884.952	1327.19	715.791	1012.5	823.74	1	10073211	10076857	ATP synthase, H+ transporting, mitochondrial Fo complex, subunit F6
JAM2	1	1	1	1	1	1	1	3.17586	1	3.63641	1	1	10083692	10165359	junctional adhesion molecule 2
MRPL39	75.2747	52.9152	85.1809	156.642	129.427	184.761	129.731	77.1552	80.0475	103.82	153.522	1	10201979	10217656	mitochondrial ribosomal protein L39
MIR155	1	1	1	1	1	1	1	1	1	1	1	1	10227338	10227339	microRNA mir-155
NCAM2	1	1	1	1	1	1	1	1	1	1	1	1	14791426	15364131	neural cell adhesion molecule 2
TMPRSS15	1	1	1	1	1	1	1	1	1	1	1	1	18058820	18206608	transmembrane protease, serine 15
CHODL	1	1	1	1	1	1	1	1	1	1	1	1	18210175	18232780	chondrolectin
C1H21orf91	490.126	396.439	611.311	1231.48	602.531	1097.79	761.125	1366.35	612.357	897.38	887.291	1	18720665	18748285	chromosome 1 open reading frame, human C21orf91
BTG3	1	6.5229	1	7.76706	1.94432	3.8863	1	3.17586	9.40931	1	9.79936	1	18913071	18928047	BTG family, member 3
CXADR	433.967	217.498	497.066	143.108	119.04	339.659	213.099	1011.69	186.846	378.007	107.57	1	18951482	18993322	coxsackie virus and adenovirus receptor
MIR125B-2	1	1	1	1	1	1	1	1	1	1	1	1	19881430	19881431	microRNA mir-125b-2
MIRLET7C	1	1	1	1	1	1	1	1	1	1	1	1	19930541	19930542	microRNA let-7c
MIR99A	1	1	1	1	1	1	1	1	1	1	1	1	19931264	19931265	microRNA mir-99a
LOC100848303	1	1	1	1	1	1	1	1	1	1	1	1	20027279	20078480	uncharacterized LOC100848303
USP25	274.548	268.308	206.942	134.085	143.592	253.07	200.839	864.818	417.261	72.1831	211.696	1	20665076	20871317	ubiquitin specific peptidase 25
LOC100296620	2.81158	2.10458	4.00646	3.25569	2.88864	3.8863	1	1	24.5461	1	2.95541	1	21597888	21645712	uncharacterized LOC100296620
NRIP1	941.209	827.225	957.054	1151.4	548.705	726.423	919.28	661.375	549.287	639.891	591.535	1	21693827	21697298	nuclear receptor interacting protein 1
SAMSN1	17.3042	24.1962	1	16.7898	11.3875	7.7347	8.35605	10.7914	31.2735	9.78804	1	1	22123736	22181230	SAM domain, SH3 domain and nuclear localization signals 1
HSPA13	124.187	116.981	116.749	118.296	71.8239	108.274	141.991	57.5724	72.4791	102.941	54.7739	1	22290152	22299613	heat shock protein 70kDa family, member 13
LOC518080	37.2316	36.3465	68.6453	20.1733	1	24.0904	9.58206	3.17586	4.36372	1.8788	1	1	22314374	22412314	canalicular multispecific organic anion transporter 1-like
RBM11	2.81158	1	2.50323	6.63922	13.2761	10.14	15.7121	1	2.68186	1	1	1	22456731	22474263	RNA binding motif protein 11
LIPI	1	1	1	1	1	1	1	1	1	1	1	1	22474418	22497635	lipase, member I
LOC100848488	1	1	1	1	1	1	1	1	1	1	1.48885	1	23928015	24032368	roundabout homolog 2-like
ROBO1	40.8547	390.916	194.917	84.4604	40.6614	47.1808	14.4861	34.7259	57.3424	45.819	73.8392	1	25620688	26796001	roundabout, axon guidance receptor, homolog 1 (Drosophila)
LOC100848584	1	1	1	1	1	1	1	1	1	1	1	1	26595773	26595774	uncharacterized LOC100848584
GBE1	120.564	156.746	309.162	187.094	101.098	180.432	153.025	172.893	135.549	136.336	47.9299	1	28659455	28972472	glucan (1,4-alpha-), branching enzyme 1
LOC100337296	1	1	1	1	1.94432	1.9621	1	1	1	1.8788	1	1	30285823	30302203	leukocyte immunoglobulin-like receptor, subfamily A (with TM domain), member 6-like
CADM2	1	1	1	1	1	1	1	1	1	1	1	1	32394955	33668292	cell adhesion molecule 2
VGLL3	11.8695	2.10458	5.50969	2.12784	4.77727	3.40525	12.0341	63.0121	1.84093	1	1	1	34658087	34707256	vestigial like 3 (Drosophila)
LOC787167	1	1	1	1	1	1	2.22601	1	1	1	1	1	34969879	34970395	uncharacterized LOC787167
CHMP2B	207.52	112.562	160.342	113.784	126.594	110.198	86.8206	120.672	110.321	121.396	102.681	1	34970659	35002768	charged multivesicular body protein 2B
POU1F1	1	1	1	1	1	1	1	1	1	1	1	1	35009034	35024692	POU class 1 homeobox 1
HTR1F	1	1	1	1	1	1	13.2601	1	1	6.27283	1	1	35603048	35604149	5-hydroxytryptamine (serotonin) receptor 1F
CGGBP1	231.071	213.079	503.079	366.421	380.616	490.228	426.425	721.211	445.012	316.491	342.708	1	35657013	35657517	CGG triplet repeat binding protein 1
C1H3orf38	205.708	168.896	265.568	161.154	222.915	124.63	81.9165	70.6276	235.62	103.82	119.791	1	35753358	35758922	chromosome 1 open reading frame, human C3orf38
LOC100295593	1	1	1	1	1	1	1	1	1	1	1	1	36656608	36712246	uncharacterized LOC100295593
EPHA3	1	1	1	1	1	1	1	1	1	8.90924	1	1	36715259	37123463	EPH receptor A3
PROS1	147.738	103.726	115.245	108.145	95.4318	76.5248	57.3964	17.319	71.6382	39.6674	229.783	1	37803426	37866915	protein S (alpha)
ARL13B	789.037	378.766	467.001	623.569	493.934	730.753	747.639	367.633	466.035	546.737	446.834	1	37875663	37952674	ADP-ribosylation factor-like 13B
STX19	6.43474	3.20916	7.01292	1	1	3.40525	3.45202	1	1	1.8788	9.31051	1	37915550	37916429	syntaxin 19
NSUN3	78.8979	20.8824	130.278	55.1365	34.9955	23.1283	43.9103	78.2431	47.2512	74.8196	34.7309	1	37960768	38019558	NOP2/Sun domain family, member 3
EPHA6	1	1	1	1	1	1	1	1	1	1	1	1	40608728	41623781	EPH receptor A6
ARL6	10.0579	16.4641	11.5226	8.8949	7.61023	14.9504	21.8421	20.5828	21.1823	9.78804	16.6433	1	41643902	41677046	ADP-ribosylation factor-like 6
MINA	216.578	237.38	259.555	529.958	464.66	340.621	541.67	257.752	487.058	550.253	581.269	1	41826760	41852771	MYC induced nuclear antigen
GABRR3	1	1	1	1	1	1	1	1	1	1	1	1	41870256	41915644	gamma-aminobutyric acid (GABA) receptor, rho 3
LOC100137810	1	1	1	1	1	1	1	1	1	1	1	1	41953492	41967112	uncharacterized LOC100137810
LOC783655	1	1	1	1	1	1	1	1	1	1	1	1	41997956	41998880	olfactory receptor 5AC1-like
OR5AC2	1	1	1	1	1	1	1	1	1	1	1	1	42035718	42036648	olfactory receptor, family 5, subfamily AC, member 2
OR5K3	1	1	1	1	1	1	1	1	1	1	1	1	42069257	42070184	olfactory receptor, family 5, subfamily K, member 3
LOC783812	1	1	1	1	1	1	1	1	1	1	1	1	42089703	42090642	olfactory receptor, family 5, subfamily H, member 1-like
LOC783843	1	1	1	1	1	1	1	1	1	1	1	1	42095394	42096366	olfactory receptor, family 5, subfamily H, member 1-like
LOC783884	1	1	1	1	1	1	1	1	1	1	1	1	42119037	42119967	olfactory receptor, family 5, subfamily H, member 1-like
LOC783917	1	1	1	1	1	1	1	1	1	1	1	1	42157742	42158696	olfactory receptor, family 5, subfamily H, member 6-like
OR5H2	1	1	1	1	1	1	1	1	1	1	1	1	42263382	42264312	olfactory receptor, family 5, subfamily H, member 2
LOC785875	1	1	1	1	1	1	1	1	1	1	1	1	42334675	42335728	olfactory receptor 5K3-like
LOC785848	1	1	1	1	1	1	1	1	1	1	1	1	42358201	42359149	uncharacterized LOC785848
OR5K1	1	1	1	1	1	1	1	1	1	1	1	1	42420005	42420974	olfactory receptor, family 5, subfamily K, member 1
CLDND1	252.809	250.635	361.775	487.1	520.375	600.869	447.267	572.164	579.56	517.737	646.775	1	42452908	42457548	claudin domain containing 1
LOC100848517	1	1	1	1	1	1	1	1	1	1	1	1	42461996	42481984	uncharacterized LOC100848517
GPR15	1	1	1	1	1	1	1	1	1	1	1	1	42468326	42469403	G protein-coupled receptor 15
CPOX	218.389	291.504	352.756	432.964	357.008	302.137	416.617	410.062	508.922	394.704	223.428	1	42518690	42531414	coproporphyrinogen oxidase
LOC100848540	1	1	1	1	1	1	1	1	1	1	1	1	42566967	42571478	uncharacterized LOC100848540
LOC100848335	1	1	1	1	1	1	1	1	1	1	1	1	42640083	42641019	uncharacterized LOC100848335
ST3GAL6	17.3042	16.4641	10.0194	82.2047	10.4432	23.1283	14.4861	83.6828	13.614	16.8185	7.84395	1	42696781	42738904	ST3 beta-galactoside alpha-2,3-sialyltransferase 6
DCBLD2	604.256	565.44	548.176	426.197	488.268	497.443	473.013	1129.19	565.265	479.948	574.425	1	42743865	42826079	discoidin, CUB and LCCL domain containing 2
COL8A1	1	1	1	1	1	1	1	1	1	16.8185	1	1	43709909	43714914	collagen, type VIII, alpha 1
FILIP1L	368.751	459.4	563.208	358.526	232.358	1016.02	441.137	2607.68	182.641	107.335	33.2643	1	43744779	43855423	filamin A interacting protein 1-like
TMEM30C	1	1	1	3.25569	1	1	1	1	5.20465	1	1	1	44128205	44151800	transmembrane protein 30C
TBC1D23	2937.57	2316.2	2164.15	1879.99	2062.45	2515.93	3327.16	1512.14	1622.31	2441.44	1907.04	1	44199321	44254410	TBC1 domain family, member 23
NIT2	19.1158	17.5687	2.50323	14.5341	18.942	7.25365	32.8762	3.17586	16.1368	8.90924	1.97771	1	44261525	44281022	nitrilase family, member 2
TOMM70A	200.274	235.171	151.323	164.537	221.026	170.811	167.737	209.883	202.823	153.033	325.11	1	44294832	44331668	translocase of outer mitochondrial membrane 70 homolog A (S. cerevisiae)
LNP1	68.0284	20.8824	103.22	103.634	213.472	155.417	27.9722	33.6379	95.1843	124.033	5.88853	1	44356981	44370239	leukemia NUP98 fusion partner 1
LOC529036	1	1	1	17.9176	4.77727	3.8863	2.22601	12.9672	16.9777	1	1	1	44447086	44490582	transmembrane protein 45A-like
EFHB	1	26.4053	11.5226	1	6.66591	3.40525	32.8762	1	1	1	1	1	44647714	44712979	EF-hand domain family, member B
RAB5A	694.835	607.414	342.233	448.754	622.361	649.936	573.546	671.166	480.331	508.949	562.204	1	44734659	44753964	RAB5A, member RAS oncogene family
NBAS	347.012	1096.74	767.647	864.928	628.972	616.263	677.756	602.626	534.15	828.834	400.393	1	44792323	44835585	neuroblastoma amplified sequence
KAT2B	656.792	868.095	848.821	324.691	604.419	550.359	486.499	614.593	778.02	954.503	558.782	1	44855021	44928951	K(lysine) acetyltransferase 2B
SGOL1	977.441	862.572	805.228	545.748	600.642	899.601	696.147	677.693	694.768	689.104	654.597	1	44948891	44964029	shugoshin-like 1 (S. pombe)
PRDM9	1	1	1	1	1	1	1	1	1	1	1	1	45021285	45044430	PR domain containing 9
ZNF596	109.695	134.654	52.1098	25.8126	34.0511	24.0904	63.5264	29.2862	77.5247	26.4853	43.0414	1	45072803	45078693	zinc finger protein 596
TMEM45A	1	2.10458	2.50323	1	1	3.8863	1	1	1.84093	1	1	1	45366510	45394012	transmembrane protein 45A
GPR128	1	1	1	1	1	7.7347	1	1	1	1	1	1	45415291	45477878	G protein-coupled receptor 128
TFG	2638.66	2350.44	2980.4	2671.73	2655.48	4402.12	3641.02	4827.06	5494.8	4761.48	4644.13	1	45494609	45520938	TRK-fused gene
ABI3BP	6.43474	3.20916	8.51615	5.51137	3.83295	5.8105	1	2.08793	6.04559	7.15163	1.48885	1	45522798	45823416	ABI family, member 3 (NESH) binding protein
IMPG2	95.2021	52.9152	59.626	48.3694	52.9375	64.0175	67.2044	95.65	148.163	40.5462	14.6879	1	46090214	46161410	interphotoreceptor matrix proteoglycan 2
PCNP	214.766	234.066	256.549	156.642	241.801	195.344	222.907	253.4	159.936	167.094	252.759	1	46355788	46368899	PEST proteolytic signal containing nuclear protein
ZBTB11	216.578	261.681	238.51	384.467	383.449	298.77	309.954	150.047	454.262	459.736	450.745	1	46382708	46412050	zinc finger and BTB domain containing 11
RPL24	1039.03	855.944	1534.29	933.726	905.657	936.161	1030.85	1826.55	1206.89	1336.78	879.958	1	46415257	46420683	ribosomal protein L24
CEP97	357.881	260.576	196.42	169.049	273.908	259.324	263.366	209.883	372.691	106.457	119.791	1	46431164	46451696	centrosomal protein 97kDa
NFKBIZ	24.5505	16.4641	1	8.8949	7.61023	9.17785	7.13004	23.8466	6.04559	16.8185	11.7548	1	46543498	46553152	nuclear factor of kappa light polypeptide gene enhancer in B-cells inhibitor, zeta
ZPLD1	1	1	1	1	1	1	1	1	1	1	1	1	47253804	47305082	zona pellucida-like domain containing 1
ALCAM	28.1737	56.229	38.5807	163.409	127.539	28.4198	26.7462	93.4742	72.4791	77.456	60.1512	1	50332271	50558841	activated leukocyte cell adhesion molecule
CBLB	77.0863	88.2618	59.626	111.529	27.4409	76.5248	54.9444	96.738	28.7507	40.5462	62.5955	1	50659513	50880121	Cas-Br-M (murine) ecotropic retroviral transforming sequence b
TMSB4	24.5505	1	5.50969	2.12784	1	1.9621	2.22601	1	1.84093	7.15163	7.35509	1	51022883	51023018	thymosin beta 4, X-linked
MIR2286	1	1	1	1	1	1	1	1	1	1	1	1	52194978	52194979	microRNA mir-2286
LOC100848469	26.3621	9.83663	2.50323	25.8126	30.2739	9.6589	8.35605	1	7.72745	8.03043	1.48885	1	52200738	52200739	uncharacterized LOC100848469
CCDC54	1	1	1	1	1	1	1	1	1	1	1	1	52363870	52364857	coiled-coil domain containing 54
BBX	1754.61	2589.03	1752.26	1908.18	1597.84	1331.1	1139.96	2381.39	1127.01	1148.72	1723.72	1	52748704	52840954	bobby sox homolog (Drosophila)
LOC100848494	1	1	1	1	1	1	1	1	1	1	1	1	52946536	52951310	uncharacterized LOC100848494
CD47	60.7821	26.4053	79.1679	51.7529	54.8261	34.1924	19.3901	141.343	60.7061	45.819	71.8837	1	53105966	53168920	CD47 molecule
IFT57	120.564	130.236	128.775	131.83	145.481	92.8805	111.341	61.9242	107.798	51.0918	180.898	1	53295682	53368834	intraflagellar transport 57 homolog (Chlamydomonas)
MYH15	1	17.5687	1	1	6.66591	1	1	4.26379	35.4782	1.8788	1	1	53530490	53687493	myosin, heavy chain 15
KIAA1524	220.201	447.25	246.026	384.467	465.605	418.07	546.574	262.104	275.984	302.43	308	1	53729954	53753770	KIAA1524 ortholog
DZIP3	20.9274	30.8236	44.5937	67.5427	16.1091	21.6851	47.5883	69.5397	41.3647	9.78804	19.5764	1	53768377	53884123	DAZ interacting protein 3, zinc finger
TRAT1	1	3.20916	1	42.7302	1	1	1	1	1	1	1	1	53995616	54041405	T cell receptor associated transmembrane adaptor 1
LOC100297006	1	1	1	1	1	1	1	1	1	1	1	1	54302654	54337567	uncharacterized LOC100297006
DPPA2	216.578	165.582	223.478	350.631	306.015	265.577	237.62	206.619	422.306	443.039	197.519	1	54481548	54493234	developmental pluripotency associated 2
DPPA4	122.376	198.72	411.382	136.341	181.365	45.7376	81.9165	404.623	306.258	181.155	291.379	1	54509506	54518332	developmental pluripotency associated 4
LOC614129	1	1	1	1	1	1	1	1	1	1	1	1	55266047	55266048	eukaryotic translation initiation factor 4A2 pseudogene
CD96	1	1	1	1	1	1	1	1	1	1	1	1	56722611	56818685	CD96 molecule
ZBED2	1	1	1	1	1	1	1	1	1	1	1	1	56759265	56759919	zinc finger, BED-type containing 2
PLCXD2	1	2.10458	2.50323	1	5.72159	1	2.22601	11.8793	1.84093	1	4.42197	1	56844454	56894475	phosphatidylinositol-specific phospholipase C, X domain containing 2
PHLDB2	299.911	548.871	507.588	315.668	261.632	175.14	132.183	559.109	101.912	129.305	269.869	1	57054878	57145559	pleckstrin homology-like domain, family B, member 2
ABHD10	13.6811	6.5229	13.0258	16.7898	13.2761	11.1021	8.35605	22.7586	24.5461	6.27283	8.3328	1	57156339	57168989	abhydrolase domain containing 10
TAGLN3	1	1	1	1	1	1	1	1	1	1	1	1	57178661	57192110	transgelin 3
TMPRSS7	1	1	1	8.8949	1	1	1	1	1	1	1	1	57227952	57268818	transmembrane protease, serine 7
C1H3orf52	1	6.5229	7.01292	2.12784	1	9.6589	1	5.35173	1.84093	2.75761	1	1	57279625	57319610	chromosome 1 open reading frame, human C3orf52
SLC9A10	1	1	1	2.12784	1	1	1	1	1	1	1	1	57348755	57501868	solute carrier family 9, member 10
LOC100848747	1	3.20916	1	1	1	1	1	1	1	1	1	1	57516240	57526411	poliovirus receptor-related protein 1-like
CD200	1	1	1	3.25569	1.94432	3.8863	1	1	4.36372	1.8788	1	1	57568630	57590974	CD200 molecule
ATG3	77.0863	82.7388	76.1615	137.469	216.305	166.481	167.737	146.783	143.958	211.913	225.873	1	57752371	57786379	ATG3 autophagy related 3 homolog (S. cerevisiae)
SLC35A5	33.6084	23.0916	50.6066	48.3694	25.5523	54.3965	36.5542	47.7811	26.2279	53.7283	23.9761	1	57787989	57805935	solute carrier family 35, member A5
CCDC80	1	1	1	1	1	1	1	1	1	176.761	1	1	57820079	57854492	coiled-coil domain containing 80
CD200R1	1	1	1	1	1	1	1	1	1	1	1	1	58015210	58035590	CD200 receptor 1
CD200R1L	1	1	1	1	1	1	1	1	1	1	1	1	58085937	58125682	CD200 receptor 1-like
GTPBP8	49.9126	38.5557	79.1679	125.063	96.3761	23.1283	97.8546	42.3414	65.7517	89.7592	45.9745	1	58152862	58166519	GTP-binding protein 8 (putative)
C1H3orf17	29.9853	59.5427	52.1098	17.9176	79.3784	22.1662	13.2601	80.419	91.8205	72.1831	72.8614	1	58170477	58185749	chromosome 1 open reading frame, human C3orf17
BOC	1	10.9412	11.5226	2.12784	1.94432	3.40525	2.22601	2.08793	1	1	1	1	58428031	58464876	Boc homolog (mouse)
WDR52	1	2.10458	7.01292	4.38353	1	12.0641	20.6161	60.8362	1.84093	16.8185	1	1	58469278	58575453	WD repeat domain 52
SPICE1	236.505	199.824	285.11	160.026	200.251	231.904	243.75	461.195	346.623	328.794	242.005	1	58585793	58634230	spindle and centriole associated protein 1
SIDT1	1	1	1	1	1	2.9242	1	1	1	1	1	1	58662680	58771764	SID1 transmembrane family, member 1
KIAA2018	1511.86	1266.85	749.608	1349.9	1030.31	1216.13	1365.55	1413.14	1505.43	1463.33	1661.15	1	58790853	58811091	KIAA2018 ortholog
NAA50	145.926	208.661	241.517	194.989	267.298	263.653	242.524	350.226	164.982	231.247	150.1	1	58849899	58878946	N(alpha)-acetyltransferase 50, NatE catalytic subunit
ATP6V1A	3414.01	2974.53	4700.1	3338.29	5275.96	4013.92	4630.41	2283.48	3290.72	3318.49	2436.47	1	58910245	58937968	ATPase, H+ transporting, lysosomal 70kDa, V1 subunit A
GRAMD1C	289.041	399.753	516.608	241.231	238.968	225.169	115.019	381.776	106.957	122.275	38.6417	1	59026503	59062915	GRAM domain containing 1C
ZDHHC23	446.648	451.668	426.414	446.498	603.475	446.452	568.642	441.612	457.625	573.98	399.415	1	59064837	59074350	zinc finger, DHHC-type containing 23
KIAA1407	40.8547	47.3923	64.1356	5.51137	49.1602	55.8397	10.8081	20.5828	13.614	88.0016	3.44427	1	59082201	59179987	KIAA1407 ortholog
QTRTD1	55.3474	57.3335	71.6518	73.182	99.2091	117.895	54.9444	67.3638	48.9331	109.093	128.102	1	59186732	59202916	queuine tRNA-ribosyltransferase domain containing 1
DRD3	1	1	1	1	1	1	1	1	1	2.75761	1	1	59297290	59344117	dopamine receptor D3
TIGIT	1	1	1	1	1	1	1	1	1	1	1	1	59371393	59387525	T cell immunoreceptor with Ig and ITIM domains
ZBTB20	1	5.41832	1	2.12784	1	1	1	1	1.84093	1	1	1	59420221	59434013	zinc finger and BTB domain containing 20
GAP43	1	1	1	1	1	1	1	1	1	1	1	1	60856365	60956785	growth associated protein 43
LSAMP	4.62316	1	1	1	2.88864	3.8863	1	2.08793	1	1.8788	1	1	61034467	61780544	neuronal growth regulator 1-like
LOC538060	1	1	1	8.8949	1	1	4.67802	1	1.84093	11.5457	1	1	62162864	62169582	aldo-keto reductase family 1, member C1 (dihydrodiol dehydrogenase 1; 20-alpha (3-alpha)-hydroxyster
LOC100337250	1	1	1	1	1	1	1	1	1	1	1	1	63176804	63482058	uncharacterized LOC100337250
IGSF11	19.1158	51.8106	34.071	12.2784	21.775	9.6589	9.58206	77.1552	32.9554	23.8489	53.7962	1	64357502	64487884	immunoglobulin superfamily, member 11
C1H3orf30	1	1	1	1	1	1	1	1	1	1	1	1	64552518	64559966	chromosome 1 open reading frame, human C3orf30
UPK1B	129.622	81.6343	34.071	117.168	81.267	92.3995	85.5945	146.783	93.5024	87.1228	57.2181	1	64590851	64604738	uroplakin 1B
B4GALT4	8.24632	6.5229	22.0452	16.7898	17.9977	32.2682	3.45202	22.7586	5.20465	17.6973	21.5318	1	64615139	64633289	UDP-Gal:betaGlcNAc beta 1,4- galactosyltransferase, polypeptide 4
ARHGAP31	100.637	205.347	43.0904	183.711	293.739	55.8397	80.6905	56.4845	58.1833	94.1532	100.237	1	64678145	64795985	Rho GTPase activating protein 31
TMEM39A	106.072	94.8892	184.394	190.478	139.815	87.1079	225.359	284.95	322.236	339.34	261.07	1	64806718	64834095	transmembrane protein 39A
POGLUT1	19.1158	41.8694	92.697	21.3012	1	9.17785	40.2323	10.7914	2.68186	1	1.48885	1	64841728	64863806	protein O-glucosyltransferase 1
TIMMDC1	33.6084	18.6733	32.5678	37.091	34.9955	16.3936	14.4861	17.319	28.7507	22.0913	21.5318	1	64870960	64891029	translocase of inner mitochondrial membrane domain containing 1
CD80	1	1	1	1	1	1	1	1	1	1	1	1	64897607	64919556	CD80 molecule
ADPRH	2.81158	5.41832	1	6.63922	16.1091	53.9155	9.58206	42.3414	1	1	19.0876	1	64933573	64937122	ADP-ribosylarginine hydrolase
PLA1A	1	1	1	1	1	1	1	1	1	1	1	1	64945879	64975917	phospholipase A1 member A
POPDC2	1	1	1	1	1	1	1	1	1	1	1	1	65002508	65014276	popeye domain containing 2
COX17	11.8695	4.31374	14.5291	15.662	9.49886	12.0641	8.35605	12.9672	16.9777	22.0913	43.5302	1	65029912	65031979	COX17 cytochrome c oxidase assembly homolog (S. cerevisiae)
NR1I2	2.81158	1	1	1	1	3.8863	2.22601	1	5.20465	1	1	1	65227485	65237791	nuclear receptor subfamily 1, group I, member 2
GSK3B	308.968	299.236	289.62	456.649	484.491	648.974	557.608	624.385	639.267	519.495	473.232	1	65245956	65322595	glycogen synthase kinase 3 beta
GPR156	13.6811	4.31374	1	1	1	8.21575	1	1	1	1	1	1	65541497	65620536	G protein-coupled receptor 156
LRRC58	1	16.4641	1	13.4063	3.83295	86.1458	5.90403	67.3638	13.614	1.8788	3.93312	1	65681205	65700685	leucine rich repeat containing 58
FSTL1	66.2168	46.2877	44.5937	77.6933	1.94432	332.924	52.4923	118.497	43.0465	75.6984	29.3535	1	65745209	65802344	follistatin-like 1
NDUFB4	49.9126	67.2747	118.252	33.7075	127.539	73.6385	61.0744	115.233	76.6838	65.1527	99.2595	1	65922509	65928564	NADH dehydrogenase (ubiquinone) 1 beta subcomplex, 4, 15kDa
HGD	1	1	1	1	1	1	1	1	1	1	1	1	65942276	65984631	homogentisate 1,2-dioxygenase
RABL3	8.24632	30.8236	20.542	16.7898	8.55455	14.4694	39.0063	12.9672	31.2735	3.63641	32.2866	1	65993058	66037875	RAB, member of RAS oncogene family-like 3
GTF2E1	343.388	260.576	280.601	222.057	237.08	237.677	199.613	190.3	332.327	373.613	268.892	1	66042805	66070581	general transcription factor IIE, polypeptide 1, alpha 56kDa
STXBP5L	203.897	533.407	270.078	357.398	79.3784	72.1954	149.347	769.08	54.8196	124.033	80.6831	1	66213611	66537346	syntaxin binding protein 5-like
POLQ	1894.1	1639.09	1618.48	1462.68	2045.45	1708.73	1436.66	1067.17	1346.49	1857.91	971.374	1	66552041	66658759	polymerase (DNA directed), theta
ARGFX	232.882	119.19	2.50323	165.665	649.747	271.831	61.0744	12.9672	741.86	871.016	740.146	1	66679346	66696544	arginine-fifty homeobox
FBXO40	1	1	1	1	2.88864	1	2.22601	2.08793	1	1	1	1	66711445	66717261	F-box protein 40
HCLS1	10.0579	7.62747	7.01292	14.5341	1.94432	16.8746	1	1	1	1	1	1	66722068	66751175	hematopoietic cell-specific Lyn substrate 1
GOLGB1	3897.71	3573.21	2312.97	3072.12	2488.33	2184	2936.06	2923.18	2732.34	2885.24	2670.63	1	66760189	66823420	golgin B1
IQCB1	118.753	80.5297	97.2067	167.921	271.075	120.781	138.313	67.3638	93.5024	131.063	147.656	1	66855290	66895152	IQ motif containing B1
EAF2	2.81158	2.10458	2.50323	1	5.72159	2.9242	1	1	1	1	1.97771	1	66900683	66955923	ELL associated factor 2
SLC15A2	13.6811	27.5099	2.50323	1	1.94432	17.8367	2.22601	3.17586	2.68186	1.8788	1	1	66968037	66970956	solute carrier family 15 (H+/peptide transporter), member 2
ILDR1	102.448	66.1702	40.084	41.6024	1	20.242	9.58206	43.4293	4.36372	1.8788	1.48885	1	67082856	67116574	immunoglobulin-like domain containing receptor 1
CD86	1	1	1	1	6.66591	1	1	40.1655	13.614	1	1	1	67144233	67209102	CD86 molecule
CASR	2.81158	9.83663	1	1	20.8307	1	1	1	6.04559	1	1.48885	1	67312079	67343178	calcium-sensing receptor
CSTA	1	1	1	1	1	1	1	1	1	1	1	1	67373106	67383699	cystatin A (stefin A)
CCDC58	953.891	572.067	943.525	764.55	702.628	672.546	1409.68	791.926	714.95	878.925	866.759	1	67398633	67457618	coiled-coil domain containing 58
FAM162A	24.5505	7.62747	26.5549	33.7075	46.3273	17.8367	27.9722	42.3414	61.547	52.8494	68.9506	1	67422932	67443368	family with sequence similarity 162, member A
WDR5B	64.4053	28.6145	28.0581	37.091	23.6636	2.44315	39.0063	2.08793	9.40931	3.63641	15.6656	1	67446798	67447791	WD repeat domain 5B
KPNA1	803.529	791.879	857.841	505.146	386.282	693.712	811.391	498.185	485.376	452.705	739.169	1	67477373	67517072	karyopherin alpha 1 (importin alpha 5)
PARP9	28.1737	14.2549	29.5614	24.6847	29.3296	65.4607	119.923	3.17586	22.8642	2.75761	1.97771	1	67559721	67583156	poly (ADP-ribose) polymerase family, member 9
DTX3L	183.969	75.0068	86.6841	38.2188	92.5989	175.621	112.567	45.6052	79.2066	118.76	102.681	1	67588919	67596629	deltex 3-like (Drosophila)
PARP14	383.243	335.687	396.349	219.802	316.402	443.566	194.709	279.51	217.96	122.275	243.471	1	67613091	67659061	poly (ADP-ribose) polymerase family, member 14
HSPBAP1	19.1158	3.20916	20.542	2.12784	20.8307	8.6968	12.0341	1	15.2958	1.8788	13.2213	1	67665162	67720801	HSPB (heat shock 27kDa) associated protein 1
DIRC2	29.9853	55.1244	77.6647	84.4604	85.9886	51.0292	58.6224	44.5173	70.7973	100.305	93.3933	1	67722340	67809880	disrupted in renal carcinoma 2
SEMA5B	31.7968	62.8564	91.1938	4.38353	32.1625	73.1575	20.6161	36.9017	30.4326	28.2429	24.465	1	67840312	67878001	sema domain, seven thrombospondin repeats (type 1 and type 1-like), transmembrane domain (TM) and sh
PDIA5	62.5937	76.1114	70.1486	61.9035	100.153	65.4607	72.1085	110.881	44.7284	104.699	172.588	1	68012176	68101702	protein disulfide isomerase family A, member 5
SEC22A	55.3474	31.9282	46.0969	8.8949	29.3296	37.0787	21.8421	29.2862	4.36372	5.39402	9.79936	1	68170571	68232640	SEC22 vesicle trafficking protein homolog A (S. cerevisiae)
ADCY5	4.62316	1	4.00646	2.12784	1	1	1	2.08793	9.40931	13.3033	1	1	68263140	68420954	adenylate cyclase 5
LOC100848864	1	1	1	1	1	1	1	1	1	1	1	1	68423204	68424460	uncharacterized LOC100848864
PTPLB	53.5358	112.562	92.697	88.9718	61.4364	80.8543	101.533	117.409	56.5014	83.6076	47.9299	1	68464629	68550708	protein tyrosine phosphatase-like (proline instead of catalytic arginine), member b
MYLK	153.173	133.549	187.4	143.108	176.643	318.493	139.539	133.728	34.6372	46.6978	62.5955	1	68580207	68667822	myosin light chain kinase
CCDC14	24.5505	21.987	11.5226	20.1733	7.61023	23.1283	34.1022	14.0552	14.4549	28.2429	1.48885	1	68895326	68896232	coiled-coil domain containing 14
ROPN1	1	1	1	1	1	1	1	1	1	1	1	1	68954653	68965531	rhophilin associated tail protein 1
KALRN	102.448	90.4709	58.1227	101.378	142.648	123.187	96.6286	37.9897	128.821	59.0011	260.092	1	69628965	69675387	kalirin, RhoGEF kinase
LOC100847188	91.579	35.242	97.2067	83.3325	89.7659	42.3703	79.4645	51.0448	92.6615	44.0614	158.9	1	69663729	69724961	kalirin-like
UMPS	154.984	204.243	161.846	276.194	199.307	365.636	339.378	275.159	261.689	485.221	226.85	1	69732811	69782469	uridine monophosphate synthetase
ITGB5	20.9274	34.1374	59.626	54.0086	67.1023	48.1429	25.5202	74.9793	22.8642	84.4864	18.1099	1	69802237	69899675	integrin, beta 5
MUC13	17.3042	1	10.0194	30.3239	50.1046	15.9125	4.67802	8.61552	4.36372	1	4.91083	1	69937357	69958892	mucin 13, cell surface associated
HEG1	225.636	203.138	130.278	112.656	68.9909	162.633	209.421	209.883	133.026	146.003	99.2595	1	70027674	70106394	heart development protein with EGF-like domains 1
SLC12A8	48.1011	35.242	31.0646	21.3012	38.7727	51.5102	68.4304	77.1552	55.6605	155.67	112.459	1	70127296	70280058	solute carrier family 12, member 8
ZNF148	566.213	519.048	453.472	435.22	513.765	374.295	383.514	497.097	710.746	963.291	411.637	1	70292379	70372592	zinc finger protein 148
SNX4	1435.77	1085.7	1519.26	1550.66	876.383	1394.6	1417.04	2355.28	1053.85	1015.14	897.557	1	70506084	70557862	sorting nexin 4
OSBPL11	1194.83	1677.75	1385.47	1215.69	1207.84	655.709	1441.56	866.994	996.662	1162.78	923.466	1	70574542	70663866	oxysterol binding protein-like 11
LMLN	46.2895	130.236	86.6841	78.8212	90.7102	51.5102	52.4923	27.1104	59.0242	64.2739	106.592	1	70730928	70784212	leishmanolysin-like (metallopeptidase M8 family)
RPL35A	674.907	664.852	1033.72	358.526	616.696	496.481	371.254	803.894	556.014	1081.05	877.514	1	70788746	70791442	ribosomal protein L35a
IQCG	10.0579	10.9412	14.5291	6.63922	1	2.9242	1	5.35173	8.56838	7.15163	2.46656	1	70797034	70837730	IQ motif containing G
LRCH3	481.068	520.152	355.762	398.001	433.498	407.968	414.165	680.957	371.01	530.919	431.68	1	70842446	70947214	leucine-rich repeats and calponin homology (CH) domain containing 3
FYTTD1	417.663	287.086	259.555	275.066	206.861	283.857	542.896	123.936	141.435	115.245	300.667	1	70954733	70984188	forty-two-three domain containing 1
KIAA0226	58.9705	134.654	142.304	108.145	80.3227	167.924	292.79	104.353	266.734	143.366	188.231	1	70996497	71044754	KIAA0226 ortholog
MUC20	53.5358	36.3465	16.0323	153.259	84.1	141.948	107.663	55.3966	80.8884	76.5772	35.7086	1	71072050	71085343	mucin 20, cell surface associated
MUC4	31.7968	20.8824	2.50323	49.4973	34.9955	8.21575	67.2044	35.8138	32.9554	35.2734	1	1	71095993	71121537	mucin 4, cell surface associated
TNK2	13.6811	9.83663	7.01292	15.662	1.94432	6.7726	7.13004	9.70345	21.1823	48.4554	8.82165	1	71208140	71226400	tyrosine kinase, non-receptor, 2
TFRC	1388.67	2094.18	1725.2	1335.24	2593.15	1149.75	1177.97	749.497	3396.68	2688.38	2133.87	1	71260148	71280648	transferrin receptor (p90, CD71)
ZDHHC19	1	1	1	2.12784	1	3.8863	1	1	5.20465	1	1	1	71396853	71409403	zinc finger, DHHC-type containing 19
PCYT1A	80.7095	73.9022	121.258	87.8439	152.091	138.099	101.533	193.564	186.846	173.246	119.302	1	71432053	71465126	phosphate cytidylyltransferase 1, choline, alpha
TCTEX1D2	1	1	2.50323	1	1	1.48105	1	1	1	1	1.48885	1	71489385	71516670	Tctex1 domain containing 2
UBXN7	111.506	79.4251	74.6582	60.7757	101.098	142.429	47.5883	130.464	115.367	59.8799	121.258	1	71542843	71594667	UBX domain protein 7
RNF168	511.865	355.57	467.001	385.594	446.718	417.589	584.58	336.083	330.645	243.55	251.293	1	71631334	71652598	ring finger protein 168, E3 ubiquitin protein ligase
C1H3orf43	1	1	1	1	1	1	1	1	1	1	1	1	71655127	71661714	chromosome 1 open reading frame, human C3orf43
WDR53	69.84	29.7191	142.304	57.3922	55.7705	43.8134	77.0125	127.2	84.2522	41.425	24.465	1	71697276	71702080	WD repeat domain 53
FBXO45	17.3042	16.4641	25.0517	21.3012	14.2204	13.0262	56.1704	3.17586	15.2958	3.63641	13.7102	1	71710382	71720975	F-box protein 45
CEP19	11.8695	25.3007	29.5614	12.2784	64.2693	11.1021	14.4861	5.35173	13.614	2.75761	3.44427	1	71835207	71836404	centrosomal protein 19kDa
PIGX	66.2168	33.0328	64.1356	56.2643	30.2739	34.6735	80.6905	68.4518	49.774	57.2435	66.9952	1	71839801	71861505	phosphatidylinositol glycan anchor biosynthesis, class X
PAK2	595.198	776.415	648.892	617.93	549.649	512.356	546.574	601.538	387.828	675.043	504.519	1	71911218	71952257	p21 protein (Cdc42/Rac)-activated kinase 2
SENP5	218.389	331.269	217.465	137.469	270.131	195.344	149.347	289.302	188.528	218.065	123.213	1	71980543	72009655	SUMO1/sentrin specific peptidase 5
NCBP2	24.5505	6.5229	7.01292	28.0682	29.3296	10.14	16.9381	3.17586	9.40931	72.1831	50.863	1	72014704	72019956	nuclear cap binding protein subunit 2, 20kDa
LOC783161	1	1	1	1	1	1	1	1	1	1	1	1	72020186	72020486	uncharacterized protein DKFZp762I1415-like
LOC525407	158.607	427.368	351.252	204.012	248.411	133.77	133.409	110.881	170.868	75.6984	120.28	1	72024752	72028772	GPI mannosyltransferase 4-like
MFI2	13.6811	1	1	1	2.88864	16.3936	1	1	1	1.8788	1	1	72086118	72109804	antigen p97 (melanoma associated) identified by monoclonal antibodies 133.2 and 96.5
DLG1	444.837	363.302	399.356	319.052	409.89	486.86	338.152	454.667	562.742	550.253	517.229	1	72122369	72389796	discs, large homolog 1 (Drosophila)
BDH1	1	1	1	1	1	1	1	2.08793	2.68186	1	1	1	72573296	72601901	3-hydroxybutyrate dehydrogenase, type 1
APOD	1	1	1	1	1	1	1	1	1	1	1	1	72674372	72684024	apolipoprotein D
PPP1R2	44.4779	18.6733	13.0258	10.0227	22.7193	23.1283	18.1641	16.231	39.6828	25.6065	24.465	1	72709048	72726572	protein phosphatase 1, regulatory (inhibitor) subunit 2
ACAP2	46.2895	18.6733	28.0581	38.2188	52.9375	42.8513	61.0744	97.8259	53.9786	56.3647	29.3535	1	72758984	72871658	ArfGAP with coiled-coil, ankyrin repeat and PH domains 2
XXYLT1	33.6084	20.8824	31.0646	39.3467	3.83295	49.586	10.8081	29.2862	52.2968	22.9701	25.9315	1	72935317	73105188	xyloside xylosyltransferase 1
FAM43A	1	3.20916	1	3.25569	4.77727	1.48105	1	1	1	1	1	1	73468657	73469929	family with sequence similarity 43, member A
LSG1	562.589	535.616	433.93	642.743	833.889	534.484	612.778	602.626	540.878	596.829	442.923	1	73484584	73506823	large subunit GTPase 1 homolog (S. cerevisiae)
TMEM44	1	1	1	1	3.83295	2.9242	1	2.08793	1	1	1	1	73516159	73559045	transmembrane protein 44
ATP13A3	549.908	1039.3	722.55	701.391	559.092	581.627	520.827	583.043	552.651	816.53	554.382	1	73677700	73732213	ATPase type 13A3
GP5	1	1	1	1	1	1	1	1	1	1	1	1	73740502	73742417	glycoprotein V (platelet)
CPN2	1	1	1	1	1	1	1	1	1	1	1	1	73800120	73801767	carboxypeptidase N, polypeptide 2
HES1	80.7095	113.667	121.258	114.912	113.374	103.945	151.799	119.585	81.7294	55.4859	60.1512	1	73974611	73976498	hairy and enhancer of split 1, (Drosophila)
OPA1	472.011	420.74	384.324	798.385	536.428	437.793	639.75	651.583	576.197	745.347	559.271	1	74386129	74467298	optic atrophy 1 (autosomal dominant)
LOC100138235	1	1	1	1	4.77727	1	1	1	1	1	1	1	74467190	74470421	uncharacterized LOC100138235
ATP13A4	6.43474	1	1	1	1	2.44315	1	1	1.84093	1	1	1	74504186	74629830	ATPase type 13A4
ATP13A5	44.4779	81.6343	50.6066	28.0682	136.982	64.0175	35.3282	51.0448	75.0019	63.3951	109.037	1	74634936	74769379	ATPase type 13A5
HRASLS	11.8695	1	4.00646	5.51137	18.942	20.723	24.2941	1	7.72745	15.9397	8.3328	1	74778857	74785768	HRAS-like suppressor
MB21D2	115.129	99.3075	71.6518	92.3553	86.933	80.8543	57.3964	150.047	35.4782	88.0016	104.637	1	75101222	75222153	Mab-21 domain containing 2
FGF12	15.4926	6.5229	8.51615	1	5.72159	17.8367	2.22601	20.5828	1	51.9706	8.3328	1	75288420	75894927	fibroblast growth factor 12
CCDC50	234.694	308.073	221.975	234.464	385.338	564.79	351.638	589.571	355.032	410.523	527.495	1	76545815	76624237	coiled-coil domain containing 50
OSTN	1	1	1	1	1	1	1	1	1	1	1	1	76690427	76706248	osteocrin
LOC614619	1	1	1	1	1	1	1	1	1	1	1	1	76743928	76750425	histone H2B 5-like
GMNC	1	1	1	1	1	1	1	1	1	1	1	1	76850453	77001495	geminin coiled-coil domain containing
LOC782776	1	1	1	1	1	1	1	1	1	1	1	1	77037253	77037254	eukaryotic translation elongation factor 1 alpha 1 pseudogene
IL1RAP	1	1	1	50.6251	7.61023	5.8105	2.22601	1	10.2502	4.51522	24.465	1	77223758	77285537	interleukin 1 receptor accessory protein
TMEM207	1	1	1	1	1	1	1	1	1	1	1	1	77415856	77436466	transmembrane protein 207
CLDN16	1	1	1	1	1	1	1	1	1	1	1	1	77471214	77492020	claudin 16
CLDN1	11.8695	4.31374	14.5291	1	34.0511	27.4577	24.2941	39.0776	69.9563	22.0913	5.39968	1	77596606	77611595	claudin 1
LEPREL1	26.3621	91.5755	71.6518	5.51137	41.6057	59.207	36.5542	111.969	126.299	63.3951	34.7309	1	77752707	77931265	leprecan-like 1
TP63	11.8695	10.9412	2.50323	34.8353	11.3875	4.8484	12.0341	18.4069	52.2968	15.0609	31.7978	1	78013493	78283420	tumor protein p63
TPRG1	10.0579	4.31374	1	14.5341	1.94432	1.9621	31.6502	21.6707	150.686	121.396	104.637	1	78604342	78728638	tumor protein p63 regulated 1
LPP	991.934	1074.65	767.647	666.427	568.535	1028.04	873.918	1182.49	761.202	878.047	1014.39	1	79041950	79542121	LIM domain containing preferred translocation partner in lipoma
MIR28	1	1	1	1	1	1	1	1	1	1	1	1	79250615	79250616	microRNA mir-28
LOC100847122	2.81158	1	4.00646	8.8949	7.61023	1	1	1	1	5.39402	1	1	79786111	79786112	uncharacterized LOC100847122
LOC100847148	1	1	1	1	1	1	1	1	1	1	1	1	79952450	79972327	uncharacterized LOC100847148
LOC100847171	1	1	1	1	1	1	1	1	1.84093	1	1	1	80179010	80179011	uncharacterized LOC100847171
BCL6	19.1158	5.41832	47.6001	8.8949	6.66591	13.9884	50.0403	40.1655	22.0233	8.03043	85.0828	1	80190706	80202388	B-cell CLL/lymphoma 6
RTP2	1	1	1	1	1	1	1	1	1	1	1	1	80221897	80225631	receptor (chemosensory) transporter protein 2
SST	1	1	1	1	1	1	1	1	1	1	1	1	80250309	80251500	somatostatin
MASP1	1	1	1	4.38353	6.66591	1	1	1	1	1	1	1	80596983	80647823	mannan-binding lectin serine peptidase 1 (C4/C2 activating component of Ra-reactive factor)
RTP1	1	1	1	1	1	1	1	1	1	1	1	1	80673150	80675983	receptor (chemosensory) transporter protein 1
LOC100847189	1	1	1	1	1	1	1	1	1	1	1	1	80731173	80731174	uncharacterized LOC100847189
ST6GAL1	339.765	312.491	256.549	523.191	4.77727	13.9884	260.914	58.6604	225.529	88.0016	132.99	1	80788321	80824869	ST6 beta-galactosamide alpha-2,6-sialyltranferase 1
ADIPOQ	1	1	1	1	1	1	1	1	1	1	1	1	81006906	81008526	adiponectin, C1Q and collagen domain containing
RFC4	19.1158	18.6733	46.0969	15.662	23.6636	35.1545	15.7121	9.70345	26.2279	4.51522	93.8821	1	81044934	81057719	replication factor C (activator 1) 4, 37kDa
EIF4A2	834.326	711.244	1020.19	1419.83	1595.01	1557.2	1079.89	915.951	1262.4	1211.11	1752.56	1	81058411	81064057	eukaryotic translation initiation factor 4A2
MIR1248-1	1	1	1	1	1	1	1	1	1	1	1	1	81060997	81060998	microRNA mir-1248-1
KNG1	1	1	1	1	1	1	1	12.9672	1	1	1	1	81098779	81120943	kininogen 1
HRG	1	1	1	12.2784	7.61023	1.48105	9.58206	1	1	10.6669	2.95541	1	81127311	81135736	histidine-rich glycoprotein
FETUB	321.649	84.948	176.878	491.612	1086.97	149.644	294.016	27.1104	390.351	408.765	567.581	1	81151373	81166410	fetuin B
AHSG	1	1	1	1	3.83295	1	1	1	1	1	6.86624	1	81202506	81209042	alpha-2-HS-glycoprotein
DNAJB11	377.808	339.001	480.53	502.89	329.623	635.505	578.45	678.781	508.922	426.341	327.554	1	81234397	81252039	DnaJ (Hsp40) homolog, subfamily B, member 11
TBCCD1	22.7389	109.249	98.7099	30.3239	48.2159	49.586	85.5945	143.519	54.8196	66.9103	117.836	1	81258669	81275263	TBCC domain containing 1
CRYGS	1	1	1	1	1	1	1	1	1	1	1	1	81281017	81286703	crystallin, gamma S
DGKG	1	1	1	1	1	1	1	1	1	1	1	1	81530632	81687456	diacylglycerol kinase, gamma 90kDa
ETV5	22.7389	18.6733	13.0258	8.8949	1.94432	65.9417	10.8081	86.9466	7.72745	1.8788	1	1	81729046	81782745	ets variant 5
LOC616971	1	1	1	2.12784	5.72159	2.9242	1	2.08793	1.84093	1	1	1	81864258	81864259	nmrA-like family domain-containing protein 1-like
TRA2B	513.677	408.59	552.685	373.188	554.37	419.994	431.329	394.831	507.24	450.948	655.086	1	81878823	81897976	transformer 2 beta homolog (Drosophila)
IGF2BP2	75.2747	164.478	91.1938	94.611	31.2182	102.502	115.019	95.65	85.934	33.5158	112.947	1	81992468	82161355	insulin-like growth factor 2 mRNA binding protein 2
SENP2	830.703	897.918	500.072	584.095	637.47	770.199	436.233	788.662	565.265	702.286	504.519	1	82177123	82210543	SUMO1/sentrin/SMT3 specific peptidase 2
LIPH	89.7674	69.4839	10.0194	82.2047	5.72159	106.35	23.0681	355.666	24.5461	12.4245	12.2436	1	82243011	82277990	lipase, member H
TMEM41A	229.259	384.289	336.22	247.998	341.899	344.951	371.254	428.557	272.621	321.764	198.497	1	82285972	82293881	transmembrane protein 41A
MAP3K13	154.984	70.5885	82.1744	144.236	169.089	199.674	108.889	316.5	105.275	102.062	66.0175	1	82301674	82346570	mitogen-activated protein kinase kinase kinase 13
EHHADH	2.81158	3.20916	1	1	1	1	1	1	1.84093	1	1	1	82467853	82520620	enoyl-CoA, hydratase/3-hydroxyacyl CoA dehydrogenase
LOC100140254	1	1	1	1	1	1	1	1	1	1	1	1	82540595	82550013	tyrosine 3-monooxygenase/tryptophan 5-monooxygenase activation protein, zeta polypeptide-like
C1H3orf70	19.1158	39.6603	34.071	7.76706	76.5455	33.2303	31.6502	107.617	16.1368	79.2136	90.949	1	82574202	82694431	chromosome 1 open reading frame, human C3orf70
VPS8	189.404	153.432	148.316	236.719	132.26	243.93	170.189	222.938	289.439	326.158	249.337	1	82706192	82987709	vacuolar protein sorting 8 homolog (S. cerevisiae)
MAGEF1	13.6811	23.0916	13.0258	7.76706	23.6636	9.6589	3.45202	2.08793	48.0921	1	5.39968	1	83090541	83091465	melanoma antigen family F, 1
EPHB3	97.0137	111.458	115.245	76.5655	34.9955	63.0554	46.3623	78.2431	48.0921	30.8793	43.0414	1	83202526	83212913	EPH receptor B3
LOC524771	1	1	1	1	1	1	1	1	1	1	1	1	83316777	83317665	uncharacterized LOC524771
CHRD	1	3.20916	2.50323	34.8353	7.61023	2.9242	3.45202	36.9017	1	1	1	1	83416901	83427572	chordin
THPO	2.81158	1	1	8.8949	1.94432	2.44315	1	2.08793	2.68186	1	1	1	83429636	83434167	thrombopoietin
POLR2H	75.2747	58.4381	112.239	112.656	158.701	80.8543	52.4923	48.869	86.775	69.5467	67.484	1	83438116	83441105	polymerase (RNA) II (DNA directed) polypeptide H
CLCN2	131.434	378.766	354.259	231.08	166.256	99.6152	205.743	199.004	182.641	249.702	116.369	1	83443174	83456840	chloride channel 2
FAM131A	160.419	135.759	205.439	103.634	78.4341	218.916	236.394	159.838	114.526	224.216	64.0621	1	83458422	83464233	family with sequence similarity 131, member A
EIF4G1	5861.46	9453.99	6770.04	7991.77	7791.62	8599.28	7342.34	6299.04	6823.47	7507.75	7184.21	1	83467018	83484284	eukaryotic translation initiation factor 4 gamma, 1
PSMD2	2281.78	3060.68	3001.45	3010.09	3093.64	2438.48	3660.63	3268.06	2821.48	2823.72	3860.01	1	83491855	83500990	proteasome (prosome, macropain) 26S subunit, non-ATPase, 2
ECE2	6.43474	19.7778	14.5291	1	28.3852	79.8922	46.3623	3.17586	13.614	1	2.46656	1	83508205	83521770	endothelin converting enzyme 2
CAMK2N2	8.24632	6.5229	10.0194	6.63922	2.88864	2.44315	1	4.26379	4.36372	16.8185	1	1	83531170	83532307	calcium/calmodulin-dependent protein kinase II inhibitor 2
ALG3	40.8547	63.961	41.5872	42.7302	64.2693	58.2449	39.0063	63.0121	46.4103	96.7897	72.8614	1	83540717	83545873	asparagine-linked glycosylation 3, alpha-1,3- mannosyltransferase homolog (S. cerevisiae)
VWA5B2	1	1	4.00646	1	1	1	4.67802	1	1	1	1	1	83546312	83557613	von Willebrand factor A domain containing 5B2
MIR1224	1	1	1	1	1	1	1	1	1	1	1	1	83546946	83546947	microRNA mir-1224
ABCF3	133.245	124.713	164.852	163.409	214.416	181.875	171.415	102.178	217.96	182.034	175.521	1	83573437	83580983	ATP-binding cassette, sub-family F (GCN20), member 3
AP2M1	4535.38	5455.41	5564.45	3955.22	4480.85	4563.28	5135.52	5330.78	5915.27	7259.92	7665.73	1	83583500	83589914	adaptor-related protein complex 2, mu 1 subunit
DVL3	457.518	377.661	462.491	456.649	405.168	723.056	394.549	528.647	460.989	351.643	413.592	1	83595929	83609419	dishevelled segment polarity protein 3
EIF2B5	263.679	368.825	294.13	117.168	280.518	219.397	373.706	314.324	368.487	417.553	252.759	1	83616369	83625122	eukaryotic translation initiation factor 2B, subunit 5 epsilon, 82kDa
HTR3E	2.81158	1	1	2.12784	1	1.48105	1	1	1	1.8788	1	1	83643181	83648438	5-hydroxytryptamine (serotonin) receptor 3E, ionotropic
HTR3C	1	1	1	1	1	1	1	1	1	1	1	1	83676970	83683796	5-hydroxytryptamine (serotonin) receptor 3C, ionotropic
ABCC5	1443.02	1246.97	1035.22	1381.48	1397.65	1076.15	1146.09	539.526	777.179	933.411	789.52	1	83739204	83762541	ATP-binding cassette, sub-family C (CFTR/MRP), member 5
PARL	194.839	131.34	292.627	320.18	161.534	179.951	153.025	316.5	193.573	160.942	158.411	1	83860275	83914501	presenilin associated, rhomboid-like
MAP6D1	1	2.10458	5.50969	5.51137	1	2.44315	2.22601	1	1	1	1	1	83918063	83923960	MAP6 domain containing 1
YEATS2	1279.97	1370.68	1044.24	1415.32	1447.7	1908.36	1632.82	1677.5	1962.89	2328.95	1843.98	1	83929063	84009504	YEATS domain containing 2
KLHL24	10.0579	8.73205	7.01292	15.662	7.61023	12.0641	14.4861	28.1983	34.6372	2.75761	7.84395	1	84063053	84086806	kelch-like 24 (Drosophila)
KLHL6	1	1	1	1	1	1	1	1	1	1	1	1	84158821	84211374	kelch-like 6 (Drosophila)
LOC100848684	1	1	2.50323	1	1	1.48105	5.90403	3.17586	1	1	51.8407	1	84259769	84259770	uncharacterized LOC100848684
LOC613595	1	1	1	1	1	1	1	1	1	1	1.48885	1	84324176	84325181	L-lactate dehydrogenase B chain-like
MCF2L2	8.24632	4.31374	1	1	1	1	1	8.61552	4.36372	1	9.79936	1	84326118	84525334	MCF.2 cell line derived transforming sequence-like 2
B3GNT5	62.5937	54.0198	56.6195	55.1365	15.1648	69.3091	42.6843	66.2759	21.1823	15.0609	24.9538	1	84367881	84428220	UDP-GlcNAc:betaGal beta-1,3-N-acetylglucosaminyltransferase 5
LAMP3	1	1	1	14.5341	1	8.21575	1	1	1	1	1	1	84536481	84559730	lysosomal-associated membrane protein 3
MCCC1	339.765	303.655	211.452	422.813	566.647	342.064	347.96	245.785	416.42	283.096	171.61	1	84574974	84633174	methylcrotonoyl-CoA carboxylase 1 (alpha)
DCUN1D1	13.6811	17.5687	23.5484	28.0682	31.2182	15.9125	23.0681	15.1431	6.04559	15.9397	16.6433	1	84673428	84688979	DCN1, defective in cullin neddylation 1, domain containing 1 (S. cerevisiae)
ATP11B	2087.94	1736.29	1457.63	1631.86	1658.28	2428.86	1792.2	2287.83	1675.29	1648.76	2286.39	1	84722593	84841527	ATPase, class VI, type 11B
LOC784318	1	1	1	1	1	1	1	1	1	1	1	1	85695883	85729586	uncharacterized LOC784318
LOC100849009	1	1	1	1	1	1	1	1	1	1	1	1	85908067	85933238	uncharacterized LOC100849009
SOX2	109.695	51.8106	103.22	61.9035	117.151	110.198	42.6843	338.259	60.7061	152.154	132.99	1	85933424	85934387	SRY (sex determining region Y)-box 2
LOC100848836	1	1	1	1	1	1	1	1	1	1	1	1	86254182	86261654	uncharacterized LOC100848836
DNAJC19	165.854	118.085	161.846	107.017	239.913	132.327	238.846	121.76	154.89	204.883	167.699	1	86666924	86672008	DnaJ (Hsp40) homolog, subfamily C, member 19
FXR1	647.734	525.675	653.402	466.799	594.032	759.135	550.252	739.706	975.639	999.322	902.446	1	86679172	86751948	fragile X mental retardation, autosomal homolog 1
CCDC39	6.43474	10.9412	1	3.25569	8.55455	12.5452	2.22601	27.1104	1	1	1.97771	1	86953444	87004882	coiled-coil domain containing 39
TTC14	31.7968	36.3465	32.5678	23.5569	22.7193	42.8513	51.2663	16.231	22.0233	9.78804	20.5541	1	87010833	87017112	tetratricopeptide repeat domain 14
PEX5L	8.24632	2.10458	1	1	15.1648	13.0262	1	1	1	1.8788	7.84395	1	87718589	87976027	peroxisomal biogenesis factor 5-like
USP13	4.62316	13.1504	1	8.8949	1.94432	8.21575	13.2601	33.6379	36.3191	1	24.9538	1	87949705	88075188	ubiquitin specific peptidase 13 (isopeptidase T-3)
NDUFB5	80.7095	42.974	89.6906	52.8808	109.597	108.755	53.7183	88.0345	187.687	151.276	128.102	1	88097209	88111774	NADH dehydrogenase (ubiquinone) 1 beta subcomplex, 5, 16kDa
MRPL47	102.448	129.131	50.6066	120.551	59.5477	97.21	89.2726	102.178	141.435	59.0011	39.1306	1	88111970	88129093	mitochondrial ribosomal protein L47
ACTL6A	107.883	129.131	149.82	153.259	165.311	198.711	99.0806	125.024	127.14	182.034	167.699	1	88129902	88160809	actin-like 6A
GNB4	267.302	199.824	243.02	147.62	183.253	150.607	139.539	189.212	133.867	124.911	204.852	1	88225884	88257869	guanine nucleotide binding protein (G protein), beta polypeptide 4
MFN1	169.477	172.21	134.787	114.912	123.761	182.356	151.799	251.224	138.913	224.216	187.253	1	88264657	88387073	mitofusin 1
ZNF639	207.52	280.459	215.962	184.838	138.87	202.079	156.703	101.09	36.3191	89.7592	297.245	1	88405654	88410287	zinc finger protein 639
KCNMB3	1	1	1	1	1	1	1	1	1	1	1	1	88484532	88495379	potassium large conductance calcium-activated channel, subfamily M beta member 3
PIK3CA	328.896	368.825	318.181	287.472	263.52	448.857	265.818	311.061	247.393	247.944	98.2818	1	88504289	88533061	phosphatidylinositol-4,5-bisphosphate 3-kinase, catalytic subunit alpha
ZMAT3	26.3621	49.6015	37.0775	35.9631	5.72159	44.2945	30.4242	5.35173	30.4326	17.6973	14.6879	1	88636563	88663595	zinc finger, matrin-type 3
KCNMB2	1	1	1	1	1	1	1	1	1	1	1	1	88785047	88820693	potassium large conductance calcium-activated channel, subfamily M, beta member 2
TBL1XR1	1682.15	1443.58	1298.29	901.019	1113.41	1153.11	747.639	1438.16	1515.52	1745.43	1107.28	1	90564844	90604698	transducin (beta)-like 1 X-linked receptor 1
LOC616200	2.81158	3.20916	5.50969	2.12784	1.94432	6.29155	4.67802	2.08793	2.68186	3.63641	1	1	93132588	93140243	glyceraldehyde-3-phosphate dehydrogenase-like
NLGN1	1	1	1	1	1	1	1	1	1	1	1	1	93626218	93646736	neuroligin 1
LOC100294973	1	1	1	1	1	1	1	1	1	1	1	1	93789330	93798359	aTP-binding cassette, sub-family C (CFTR/MRP), member 4-like
LOC100847574	1	1	1	1	1	1.48105	5.90403	1	1	1	1	1	93807460	93828805	multidrug resistance-associated protein 4-like
LOC781410	1	1	1	1	1	1	1	1	1	1	1	1	94987029	94987410	histone cluster 1, H2bm-like
SPATA16	100.637	119.19	74.6582	65.287	3.83295	21.6851	20.6161	24.9345	6.04559	37.031	2.95541	1	94988265	95364356	spermatogenesis associated 16
GPX5	1	1	1	20.1733	1	1	1	5.35173	1	1	1	1	95126636	95134601	glutathione peroxidase 5 (epididymal androgen-related protein)
GPX6	1	5.41832	2.50323	2.12784	1	22.1662	1	42.3414	1.84093	3.63641	1	1	95159044	95165803	glutathione peroxidase 6 (olfactory)
ECT2	1457.51	1383.93	1761.28	1283.36	1278.66	1284.44	1358.19	1758.01	1453.29	1250.66	1273	1	95476967	95531172	epithelial cell transforming sequence 2 oncogene
NCEH1	73.4632	104.83	291.123	93.4831	254.077	143.872	138.313	147.871	272.621	212.792	128.591	1	95585668	95646188	neutral cholesterol ester hydrolase 1
TNFSF10	4.62316	1	1	19.0455	1	3.8863	1	1	1	24.7277	1	1	95752048	95767920	tumor necrosis factor (ligand) superfamily, member 10
GHSR	6.43474	3.20916	1	2.12784	1	1	1	1	1	1	1	1	95795897	95799140	growth hormone secretagogue receptor
FNDC3B	725.632	633.924	826.273	534.47	600.642	880.359	796.679	933.357	1037.03	1069.63	983.595	1	95891212	96173201	fibronectin type III domain containing 3B
TMEM212	1	1	1	1	1	1	1	1	1	1	1	1	96388870	96417652	transmembrane protein 212
PLD1	69.84	2.10458	40.084	48.3694	127.539	75.0817	30.4242	1	118.73	83.6076	41.086	1	96547866	96675917	phospholipase D1, phosphatidylcholine-specific
TNIK	881.427	564.335	851.828	560.41	372.117	264.134	344.282	836.531	335.69	410.523	287.468	1	96789411	97194001	TRAF2 and NCK interacting kinase
SLC2A2	1	1	1	1	4.77727	1	1	1	1	1	1	1	97220141	97249099	solute carrier family 2 (facilitated glucose transporter), member 2
EIF5A2	1	1	1	1	1	7.25365	4.67802	1	1.84093	7.15163	1.48885	1	97308999	97324798	eukaryotic translation initiation factor 5A2
RPL22L1	187.593	250.635	249.033	169.049	235.191	126.554	100.307	474.25	297.008	402.614	464.922	1	97339648	97343231	ribosomal protein L22-like 1
SLC7A14	1	1	1	1	1	1	1	1	1	1	1	1	97709413	97762144	solute carrier family 7 (orphan transporter), member 14
CLDN11	1	1	1	1	1	1	1	1	1	1	1	1	97789138	97802792	claudin 11
SKIL	191.216	246.217	194.917	246.87	79.3784	150.607	144.443	166.366	231.415	73.0619	179.92	1	97824528	97843625	SKI-like oncogene
PRKCI	850.631	408.59	713.531	509.657	798.005	722.575	482.821	1092.2	943.684	653.073	967.952	1	97883583	97951901	protein kinase C, iota
PHC3	116.941	119.19	127.271	114.912	223.859	210.257	89.2726	162.014	268.416	146.881	167.699	1	97985763	98061926	polyhomeotic homolog 3 (Drosophila)
GPR160	6.43474	2.10458	5.50969	7.76706	1	2.9242	2.22601	18.4069	6.88652	1	18.5987	1	98071465	98072479	G protein-coupled receptor 160
SEC62	1544.47	1051.45	1230.64	2043.52	1461.86	1620.21	1122.8	1502.35	1223.71	1227.81	1473.43	1	98180212	98211064	SEC62 homolog (S. cerevisiae)
SAMD7	1	1	1	1	1	1	1	1	1	1	1	1	98232992	98247591	sterile alpha motif domain containing 7
LRRC31	1	1	1	1	1	1	1	1	1	1	1	1	98303614	98330710	leucine rich repeat containing 31
LRRIQ4	1	1	1	1	1	1	1	1	1	1	1	1	98331691	98346914	leucine-rich repeats and IQ motif containing 4
LRRC34	1	1	1	1	1	1	2.22601	2.08793	1	1	1	1	98352375	98369767	leucine rich repeat containing 34
MYNN	1017.3	516.838	522.621	751.016	699.795	572.487	827.329	555.845	1178.3	1251.54	1072.08	1	98378713	98391719	myoneurin
ARPM1	2.81158	1	1	6.63922	5.72159	3.40525	1	1	1	1.8788	19.0876	1	98396459	98398142	actin related protein M1
TERC	1	1	1	1	1	1	1	1	1	1	1	1	98401867	98401868	telomerase RNA component
MECOM	71.6516	1	1	32.5796	2.88864	35.1545	5.90403	19.4948	12.773	1	1.97771	1	99090971	99143143	MDS1 and EVI1 complex locus
LOC100337483	1	1	1	1	1	1	1	1	1	1	1	1	99372893	99433929	eGF-like and EMI domain containing 1, pseudogene-like
LOC100139843	1	1	1	1	1	1	1	1	1	1	1	1	99577899	100028233	mCG140927-like
MIR551B	1	1	1	1	1	1	1	1	1	1	1	1	99671789	99671790	microRNA mir-551b
GOLIM4	93.3905	157.85	86.6841	189.35	119.04	242.006	145.669	293.654	375.214	220.701	242.005	1	100158666	100240513	golgi integral membrane protein 4
MGC133804	1	1	1	1	1	1	1	1	1	1	1	1	100346338	100375202	uncharacterized protein MGC133804
SERPINI1	1	1	2.50323	14.5341	1	7.25365	1	1	1	1	1	1	100456738	100487634	serpin peptidase inhibitor, clade I (neuroserpin), member 1
PDCD10	1990.11	1274.58	1866.51	1312.68	1348.54	1772.71	1423.17	2036.52	1399.47	2317.53	1903.13	1	100556919	100587574	programmed cell death 10
MGC151671	1	1	1	1	1	1.48105	1	1	1	1	16.1545	1	100619750	100660778	uncharacterized LOC531076
SERPINI2	1	1	1	1	1	1	1	1	1	1	1	1	100794193	100827796	serpin peptidase inhibitor, clade I (pancpin), member 2
ZBBX	1	2.10458	2.50323	1	6.66591	1	1	1	1	1	2.95541	1	100899104	100959578	zinc finger, B-box domain containing
BCHE	1	3.20916	1	7.76706	19.8864	9.17785	4.67802	1	53.9786	5.39402	14.6879	1	102337856	102409560	butyrylcholinesterase
SI	1	1	1	1	1	1	1	1	1	1	1	1	103088852	103204728	sucrase-isomaltase (alpha-glucosidase)
OTOL1	1	1	1	1	1	1	1	1	1.84093	1	1	1	106700528	106712030	otolin 1
SPTSSB	1	1	1	1	1	1	1	2.08793	1	1	1	1	106878904	106879135	serine palmitoyltransferase, small subunit B
NMD3	270.925	227.439	321.188	470.183	187.031	324.747	496.307	453.58	301.212	283.975	156.944	1	106974548	107008997	NMD3 homolog (S. cerevisiae)
B3GALNT1	20.9274	16.4641	10.0194	23.5569	25.5523	10.14	21.8421	21.6707	13.614	18.5761	10.7771	1	107212960	107213956	beta-1,3-N-acetylgalactosaminyltransferase 1 (globoside blood group)
PPM1L	17.3042	100.412	101.716	110.401	53.8818	80.3732	48.8143	102.178	154.89	110.851	29.3535	1	107241226	107576086	protein phosphatase, Mg2+/Mn2+ dependent, 1L
ARL14	1	1	1	1	1	1	1	1	1	1	1	1	107687595	107688174	ADP-ribosylation factor-like 14
KPNA4	622.372	862.572	802.221	1016.06	1218.23	970.796	1218.43	702.716	735.974	609.133	885.336	1	107774352	107834443	karyopherin alpha 4 (importin alpha 3)
TRIM59	4.62316	7.62747	16.0323	5.51137	3.83295	4.8484	7.13004	1	12.773	3.63641	15.6656	1	107891165	107892250	tripartite motif containing 59
SMC4	2068.01	1413.76	2055.91	1533.74	1419.37	1118.96	1375.35	1637.25	1259.03	1211.99	1181.09	1	107895574	107927009	structural maintenance of chromosomes 4
MIR16B	1	1	1	1	1	1	1	1	1	1	1	1	107923327	107923328	microRNA mir-16b
MIR15B	1	1	1	1	1	1	1	1	1	1	1	1	107923475	107923476	microRNA mir-15b
IFT80	26.3621	12.0458	20.542	1	8.55455	1	3.45202	21.6707	1	1.8788	2.95541	1	107960486	108058449	intraflagellar transport 80 homolog (Chlamydomonas)
LOC511229	118.753	57.3335	43.0904	136.341	61.4364	40.9271	68.4304	8.61552	63.2289	31.7582	128.102	1	108237492	108277185	uncharacterized LOC511229
IL12A	1	1	1	1	1	1	1	1	1	1	1	1	108285306	108291983	interleukin 12A (natural killer cell stimulatory factor 1, cytotoxic lymphocyte maturation factor 1,
SCHIP1	13.6811	1	7.01292	1	1	6.29155	1	8.61552	1	1	26.4204	1	108384263	108454005	schwannomin interacting protein 1
MFSD1	58.9705	111.458	161.846	189.35	77.4898	35.6356	148.121	233.817	88.4568	109.093	42.5525	1	109561210	109586806	major facilitator superfamily domain containing 1
RARRES1	2.81158	3.20916	1	3.25569	1	6.29155	4.67802	2.08793	1	9.78804	7.35509	1	109661972	109704363	retinoic acid receptor responder (tazarotene induced) 1
GFM1	622.372	716.767	430.924	727.331	417.444	512.837	361.446	379.6	462.671	399.098	521.629	1	109708533	109758001	G elongation factor, mitochondrial 1
LXN	35.42	13.1504	8.51615	5.51137	17.9977	10.621	1	58.6604	1	1	70.4172	1	109722324	109729457	latexin
MLF1	26.3621	16.4641	14.5291	1	1.94432	29.863	13.2601	10.7914	18.6595	2.75761	13.7102	1	109763306	109793650	myeloid leukemia factor 1
RSRC1	60.7821	115.876	131.781	78.8212	30.2739	128.959	99.0806	123.936	101.071	131.063	94.8598	1	109822208	110260919	arginine/serine-rich coiled-coil 1
SHOX2	1	1	1	1	1	5.32945	1	6.43966	3.52279	1	1	1	110277781	110286113	short stature homeobox 2
VEPH1	8.24632	7.62747	7.01292	1	1	11.1021	2.22601	3.17586	6.88652	30.0005	46.9522	1	110945677	111211551	ventricular zone expressed PH domain homolog 1 (zebrafish)
PTX3	1	1	1	1	1	1	1	1	1	1	1	1	111028405	111033777	pentraxin 3, long
CCNL1	410.417	285.981	300.143	261.532	314.514	334.368	298.92	287.126	543.4	364.825	282.091	1	111318619	111330656	cyclin L1
LEKR1	1	1	1	1	2.88864	1	1	1	1	1	1	1	111445586	111678579	leucine, glutamate and lysine rich 1
TIPARP	709.327	863.676	1005.16	1241.63	784.784	1435.49	1059.04	1322.84	1955.32	779.621	1149.81	1	111830979	111853973	TCDD-inducible poly(ADP-ribose) polymerase
SSR3	544.474	480.387	848.821	553.643	504.322	446.452	517.149	457.931	341.577	626.709	716.192	1	111997012	112007989	signal sequence receptor, gamma (translocon-associated protein gamma)
KCNAB1	22.7389	12.0458	1	2.12784	1	3.8863	2.22601	10.7914	1.84093	1	11.7548	1	112013797	112313365	potassium voltage-gated channel, shaker-related subfamily, beta member 1
GMPS	1312.58	1433.64	1029.21	1057.79	383.449	787.516	1354.51	1343.51	858.75	813.015	1234.87	1	112631093	112704962	guanine monphosphate synthetase
SLC33A1	82.5211	89.3663	137.794	95.7388	81.267	98.6531	111.341	121.76	80.8884	49.3342	127.613	1	112730500	112749964	solute carrier family 33 (acetyl-CoA transporter), member 1
C1H3orf33	252.809	215.288	200.93	209.651	254.077	131.846	291.564	148.959	234.779	15.0609	74.328	1	112779462	112802909	chromosome 1 open reading frame, human C3orf33
PLCH1	4.62316	1	10.0194	5.51137	4.77727	16.3936	8.35605	16.231	9.40931	1	1	1	112962345	113071514	phospholipase C, eta 1
LOC100847501	1	1	1	1	1	1	1	1	1	1	1	1	113277406	113277407	uncharacterized LOC100847501
MME	62.5937	15.3595	17.5355	7.76706	30.2739	1	2.22601	73.8914	22.0233	26.4853	1.97771	1	113388354	113497548	membrane metallo-endopeptidase
DHX36	207.52	271.622	244.523	242.358	211.583	123.668	176.319	311.061	189.369	216.307	206.807	1	114236065	114280561	DEAH (Asp-Glu-Ala-His) box polypeptide 36
ARHGEF26	1196.64	766.473	1236.65	876.206	1034.08	1072.3	1701.47	601.538	1536.54	1466.85	1340.46	1	114292760	114431455	Rho guanine nucleotide exchange factor (GEF) 26
LOC100299503	11.8695	1	2.50323	1	19.8864	41.8892	4.67802	52.1328	3.52279	65.1527	8.82165	1	115291700	115296206	THO complex subunit 2-like
RAP2B	24.5505	27.5099	10.0194	16.7898	36.8841	26.0146	67.2044	28.1983	4.36372	17.6973	44.9968	1	115479293	115479845	RAP2B, member of RAS oncogene family
P2RY1	1	3.20916	7.01292	26.9404	1	5.32945	14.4861	29.2862	45.5693	55.4859	5.39968	1	115834775	115835897	purinergic receptor P2Y, G-protein coupled, 1
MBNL1	39.0432	25.3007	43.0904	12.2784	20.8307	30.8251	12.0341	22.7586	17.8186	27.3641	13.2213	1	116241624	116394384	muscleblind-like splicing regulator 1
AADAC	1	1	1	1	1	1	1	1	1	1	1	1	116974436	116990763	arylacetamide deacetylase (esterase)
LOC523130	1	1	1	1	1	1	1	1	1	1	1	1	117252851	117253808	C1GALT1-specific chaperone 1-like
IGSF10	48.1011	9.83663	1	10.0227	49.1602	29.3819	16.9381	2.08793	31.2735	5.39402	14.199	1	117532035	117544618	immunoglobulin superfamily, member 10
MED12L	799.906	679.212	439.943	805.152	1357.04	911.146	881.274	445.964	1578.59	1659.3	1259.31	1	117548525	117952786	mediator complex subunit 12-like
P2RY12	2.81158	5.41832	10.0194	20.1733	26.4966	4.36735	15.7121	1	37.16	138.093	62.1067	1	117638816	117639836	purinergic receptor P2Y, G-protein coupled, 12
P2RY13	8.24632	16.4641	11.5226	7.76706	56.7148	23.1283	30.4242	40.1655	103.594	110.851	63.0844	1	117692341	117693343	purinergic receptor P2Y, G-protein coupled, 13
GPR87	160.419	48.4969	20.542	40.4745	60.492	91.9184	26.7462	127.2	323.077	323.521	274.269	1	117727675	117734152	G protein-coupled receptor 87
P2RY14	20.9274	12.0458	32.5678	14.5341	23.6636	24.5714	1	27.1104	22.8642	30.0005	38.6417	1	117815755	117816769	purinergic receptor P2Y, G-protein coupled, 14
GPR171	11.8695	2.10458	5.50969	14.5341	7.61023	6.7726	1	10.7914	20.3414	10.6669	48.4188	1	117834767	117835727	G protein-coupled receptor 171
CLRN1	1	1	1	1	1	1	1	1	1	1	1	1	118097063	118140747	clarin 1
SIAH2	33.6084	16.4641	11.5226	7.76706	22.7193	66.4228	21.8421	125.024	27.0689	35.2734	13.2213	1	118300797	118318162	siah E3 ubiquitin protein ligase 2
FAM194A	1	1	1	1	1	1	1	1	1	1	1	1	118371942	118417710	family with sequence similarity 194, member A
SELT	680.342	447.25	430.924	215.29	344.732	374.776	436.233	257.752	417.261	443.039	454.167	1	118448890	118475983	selenoprotein T
EIF2A	254.621	374.348	444.453	350.631	437.275	270.869	295.242	375.248	436.602	506.312	607.667	1	118495767	118536731	eukaryotic translation initiation factor 2A, 65kDa
SERP1	87.9558	119.19	134.787	54.0086	88.8216	85.1837	65.9784	204.443	95.1843	119.639	107.57	1	118537438	118539103	stress-associated endoplasmic reticulum protein 1
TSC22D2	78.8979	57.3335	65.6389	79.949	111.485	146.758	99.0806	117.409	158.254	103.82	90.4602	1	118613617	118657169	TSC22 domain family, member 2
PFN2	78.8979	34.1374	145.31	70.9263	78.4341	95.7668	99.0806	16.231	185.164	134.578	124.191	1	119151146	119156225	profilin 2
RNF13	439.402	304.759	457.982	303.262	272.964	310.796	284.208	184.86	456.785	209.277	251.782	1	119161744	119266574	ring finger protein 13
ANKUB1	1	1	1	1	1	1	1	1	1	1	1	1	119308049	119336931	ankyrin repeat and ubiquitin domain containing 1
COMMD2	510.054	417.426	489.55	548.004	577.034	540.257	590.71	1355.47	633.38	1042.38	879.469	1	119344659	119353619	COMM domain containing 2
WWTR1	2037.21	2346.02	1311.82	2211.57	2062.45	1504.28	1773.81	1150.94	2056.24	2261.28	3065.13	1	119437951	119583027	WW domain containing transcription regulator 1
TM4SF4	2.81158	1	1	1	1.94432	1	1	1	1	1	1	1	119604276	119631380	transmembrane 4 L six family member 4
TM4SF1	29.9853	20.8824	34.071	116.04	64.2693	184.28	31.6502	255.576	91.8205	69.5467	67.9729	1	119750449	119758050	transmembrane 4 L six family member 1
TM4SF18	1	1	1	1	1	1	1	1	1	1	1	1	119800422	119823076	transmembrane 4 L six family member 18
CP	2.81158	10.9412	7.01292	1	4.77727	25.5335	3.45202	1	1	1.8788	2.95541	1	119896152	119943033	ceruloplasmin (ferroxidase)
HPS3	178.535	122.504	148.316	114.912	139.815	152.05	81.9165	154.398	127.14	265.52	280.135	1	119945265	119985488	Hermansky-Pudlak syndrome 3
HLTF	207.52	225.23	237.007	217.546	267.298	233.347	116.245	478.602	205.346	270.793	382.306	1	120013940	120075035	helicase-like transcription factor
GYG1	111.506	89.3663	50.6066	117.168	63.325	76.0438	178.771	63.0121	169.186	72.1831	212.185	1	120090581	120127893	glycogenin 1
CPA3	1	1	1	1	1	1	1	1	1	1	1	1	120237059	120268817	carboxypeptidase A3 (mast cell)
CPB1	1	1	4.00646	1	1	1	1	1	1	1	1	1	120278984	120315802	carboxypeptidase B1 (tissue)
AGTR1	1	1	1	1	1	1.48105	1	22.7586	1	2.75761	1	1	120403008	120404088	angiotensin II receptor, type 1
LOC100295922	1	1	1	1	1	1	1	1	1	1	1	1	121279153	121279962	uncharacterized LOC100295922
HMGN4	26.3621	8.73205	10.0194	12.2784	10.4432	12.5452	2.22601	17.319	17.8186	19.4549	25.4427	1	121288784	121289057	high mobility group nucleosomal binding domain 4
LOC100139345	202.085	142.386	191.91	172.432	119.04	166	108.889	138.079	46.4103	103.82	38.6417	1	121430513	121435201	zinc finger protein 426-like
ZIC1	1	2.10458	7.01292	1	1.94432	6.7726	1	1	1	1	1.48885	1	121864959	121867967	Zic family member 1
ZIC4	1	1	1	1	1	1	1	1	1	1	1	1	121875411	121889027	Zic family member 4
PLSCR5	1	1	1	1	1	1	1	1	1	1	1	1	122815604	122842538	phospholipid scramblase family, member 5
PLSCR1	232.882	103.726	172.368	251.381	77.4898	177.545	165.285	169.629	127.981	114.366	58.1958	1	122919256	122937932	phospholipid scramblase 1
PLSCR4	57.1589	18.6733	37.0775	92.3553	31.2182	67.8659	46.3623	88.0345	32.9554	51.0918	54.285	1	123253448	123271040	phospholipid scramblase 4
PLOD2	13.6811	36.3465	28.0581	33.7075	1.94432	94.8047	4.67802	31.4621	5.20465	189.064	1	1	123322817	123442740	procollagen-lysine, 2-oxoglutarate 5-dioxygenase 2
C1H3orf58	446.648	250.635	358.769	461.16	323.013	180.432	246.202	109.793	236.461	80.9712	325.599	1	125865584	125884967	chromosome 1 open reading frame, human C3orf58
LOC100847509	98.8253	33.0328	35.5743	100.25	33.1068	171.773	132.183	109.793	75.8428	55.4859	83.6162	1	125895121	125895122	uncharacterized LOC100847509
SLC9A9	10.0579	10.9412	34.071	31.4518	18.942	6.29155	12.0341	35.8138	30.4326	17.6973	12.7325	1	126040207	126702880	solute carrier family 9, subfamily A (NHE9, cation proton antiporter 9), member 9
CHST2	26.3621	19.7778	44.5937	64.1592	31.2182	102.983	56.1704	63.0121	8.56838	64.2739	18.5987	1	126872957	126874541	carbohydrate (N-acetylglucosamine-6-O) sulfotransferase 2
U2SURP	3229.23	3807.38	3661.36	2821.74	3194.68	2602.52	2544.97	3394.26	2972.01	3387.91	2994.74	1	126938285	126987601	U2 snRNP-associated SURP domain containing
PAQR9	1	1	1	1	1	1	1	1	1	1	1	1	127041726	127042860	progestin and adipoQ receptor family member IX
LOC783224	1	1	1	1	1	1	1	1	1	1	1	1	127128888	127132773	ferritin light chain-like
PCOLCE2	1	13.1504	1	4.38353	1	1.48105	1	6.43966	1	41.425	1	1	127132997	127229211	procollagen C-endopeptidase enhancer 2
TRPC1	8.24632	3.20916	5.50969	5.51137	4.77727	9.17785	2.22601	32.55	1.84093	1	1	1	127257291	127318216	transient receptor potential cation channel, subfamily C, member 1
LOC100847999	1	2.10458	1	1	1	1	1	1	1.84093	1	1	1	127318224	127318896	splicing factor, proline- and glutamine-rich-like
PLS1	1113.31	1272.37	1791.35	804.024	336.233	1027.08	627.49	2228	1015.16	639.012	476.654	1	127323370	127380429	plastin 1
ATR	555.343	461.61	426.414	440.859	613.862	420.475	455.849	592.835	497.149	543.222	468.344	1	127469442	127590555	ataxia telangiectasia and Rad3 related
XRN1	366.939	350.047	277.594	337.097	323.013	348.318	411.713	583.043	419.784	254.974	320.71	1	127592002	127699862	5'-3' exoribonuclease 1
GK5	24.5505	16.4641	14.5291	7.76706	51.9932	16.3936	37.7802	28.1983	19.5005	10.6669	34.7309	1	127736220	127814692	glycerol kinase 5 (putative)
TFDP2	531.793	721.186	675.95	489.356	526.985	264.615	587.032	527.559	582.924	565.192	430.213	1	127978033	128016874	transcription factor Dp-2 (E2F dimerization partner 2)
LOC511302	8.24632	19.7778	19.0388	22.429	6.66591	8.21575	14.4861	21.6707	1.84093	1	1	1	128034608	128036420	ribosomal protein S12-like
ATP1B3	582.517	689.153	818.757	460.032	594.032	536.408	475.465	870.257	764.565	421.068	420.436	1	128051219	128085549	ATPase, Na+/K+ transporting, beta 3 polypeptide
GRK7	2.81158	1	1	1	1	1	1	12.9672	1	1	1	1	128145295	128185018	G protein-coupled receptor kinase 7
LOC100299991	1	2.10458	5.50969	5.51137	12.3318	5.8105	1	1	1	1	2.95541	1	128268870	128282393	uncharacterized LOC100299991
RASA2	1203.89	1093.43	1314.82	1091.62	680.909	1742.4	1387.62	2185.57	891.546	672.406	752.856	1	128345693	128468029	RAS p21 protein activator 2
ZBTB38	13.6811	40.7649	41.5872	40.4745	11.3875	28.4198	39.0063	20.5828	67.4335	41.425	31.3089	1	128532756	128536371	zinc finger and BTB domain containing 38
LOC100295034	22.7389	35.242	41.5872	38.2188	6.66591	39.0029	21.8421	3.17586	20.3414	1	3.44427	1	128725398	128773525	uncharacterized LOC100295034
SPSB4	115.129	163.373	59.626	92.3553	71.8239	72.6764	51.2663	41.2535	77.5247	66.0315	29.8423	1	128832265	128901497	splA/ryanodine receptor domain and SOCS box containing 4
SLC25A36	796.283	696.885	877.383	1198.77	906.601	1327.25	1600.94	1388.11	1223.71	1424.66	1488.09	1	129009735	129041439	solute carrier family 25, member 36
TRIM42	1	1	1	1	1	1	1	2.08793	1	6.27283	1	1	129262594	129292281	tripartite motif containing 42
CLSTN2	1	3.20916	1	8.8949	3.83295	49.105	1	28.1983	1	1	1	1	129389225	130108428	calsyntenin 2
NMNAT3	1	1	1	2.12784	2.88864	3.8863	2.22601	1	7.72745	1	1	1	130412834	130518100	nicotinamide nucleotide adenylyltransferase 3
KPNA6	1129.61	853.735	644.382	1051.02	754.566	1058.35	1044.33	903.983	1298.56	1240.99	1110.21	1	130554555	130642880	karyopherin alpha 6 (importin alpha 7)
RBP1	2.81158	2.10458	5.50969	6.63922	1.94432	15.9125	1	4.26379	7.72745	13.3033	10.7771	1	130588969	130615605	retinol binding protein 1, cellular
TXLNA	294.476	281.563	215.962	243.486	423.11	398.347	355.316	199.004	237.302	263.762	210.718	1	130653688	130662684	taxilin alpha
RBP2	1	1	1	1	1	1	1	1	1	1	1	1	130685226	130709915	retinol binding protein 2, cellular
COPB2	1468.38	1376.2	1304.3	1241.63	1003.87	1154.56	1480.79	1456.65	996.662	979.988	1139.54	1	130765816	130819920	coatomer protein complex, subunit beta 2 (beta prime)
MRPS22	115.129	116.981	137.794	103.634	207.806	99.6152	126.053	151.135	226.369	143.366	199.474	1	130778663	130792032	mitochondrial ribosomal protein S22
PRR23B	1	1	1	1	1	6.7726	1	1	1	2.75761	1	1	131089307	131090084	proline rich 23B
PRR23A	1	8.73205	1	7.76706	4.77727	2.9242	1	1	1	1	1	1	131113747	131114638	proline rich 23A
LOC783600	11.8695	5.41832	1	11.1506	16.1091	27.9388	31.6502	1	1	1	2.46656	1	131137814	131138690	uncharacterized LOC783600
LOC616698	1	1	1	1	1	20.723	1	1	1	1	1	1	131155309	131156110	uncharacterized LOC616698
FOXL2	1	1	1	1	1	1	1	1	1	1	1	1	131242443	131243577	forkhead box L2
PIK3CB	1040.85	1034.89	1251.69	726.203	1061.47	1016.5	802.809	1346.77	963.866	788.409	688.328	1	131429579	131530484	phosphoinositide-3-kinase, catalytic, beta polypeptide
FAIM	2.81158	13.1504	1	1	1.94432	2.44315	1	1	1	8.03043	1	1	131548752	131560581	Fas apoptotic inhibitory molecule
CEP70	223.824	172.21	243.02	81.0769	62.3807	148.201	308.728	176.157	149.845	138.093	182.853	1	131591255	131656996	centrosomal protein 70kDa
LOC616840	1	1	2.50323	16.7898	3.83295	2.9242	5.90403	1	1	1	8.3328	1	131629103	131629104	ribosomal protein L3 pseudogene
ESYT3	102.448	92.6801	184.394	91.2275	30.2739	137.137	58.6224	39.0776	159.936	136.336	79.7054	1	131669826	131722942	extended synaptotagmin-like protein 3
MRAS	443.025	394.23	706.015	779.212	728.125	395.461	800.357	351.314	764.565	632.86	1162.03	1	131769187	131805462	muscle RAS oncogene homolog
NME9	1	1	1	1	1	1	1	1	1	1	1	1	131854385	131876531	NME gene family member 9
ARMC8	125.999	203.138	137.794	220.929	161.534	165.519	105.211	163.102	154.89	151.276	113.436	1	131884331	131990608	armadillo repeat containing 8
DBR1	29.9853	61.7518	37.0775	19.0455	40.6614	35.6356	16.9381	33.6379	14.4549	25.6065	11.7548	1	132003015	132014424	debranching enzyme homolog 1 (S. cerevisiae)
A4GNT	1	1	1	1	1	1	1	1	1	1	1	1	132063621	132068263	alpha-1,4-N-acetylglucosaminyltransferase
LOC100337454	1	1	1	1	1	1	1	7.52759	1	1	1	1	132095202	132098592	zinc finger protein DZIP1L-like
DZIP1L	11.8695	1	2.50323	12.2784	6.66591	5.32945	27.9722	7.52759	1	2.75761	1	1	132100984	132129289	DAZ interacting zinc finger protein 1-like
CLDN18	1	1	1	1	1	10.621	1	2.08793	1	1	1	1	132175265	132191553	claudin 18
SOX14	1	1	1	1	1	1	1	1	1	1	1	1	132449821	132450544	SRY (sex determining region Y)-box 14
IL20RB	19.1158	1	26.5549	25.8126	1	16.3936	9.58206	3.17586	15.2958	1	1.97771	1	133269979	133309887	interleukin 20 receptor beta
NCK1	20.9274	28.6145	32.5678	47.2416	30.2739	25.0525	18.1641	32.55	19.5005	54.6071	49.8853	1	133319919	133339221	NCK adaptor protein 1
TMEM22	1	1	4.00646	1	1	1.48105	1	8.61552	1	1	1	1	133401822	133403058	transmembrane protein 22
LOC100847791	2.81158	2.10458	5.50969	1	8.55455	17.3557	2.22601	31.4621	6.04559	1	6.86624	1	133407704	133407705	uncharacterized LOC100847791
STAG1	261.867	298.132	279.097	260.404	392.892	399.79	343.056	366.545	353.35	368.34	227.339	1	133678525	134028688	stromal antigen 1
PCCB	205.708	176.628	313.672	194.989	264.465	105.388	210.647	204.443	225.529	153.033	430.702	1	134035755	134130525	propionyl CoA carboxylase, beta polypeptide
MSL2	453.895	658.225	629.35	368.677	439.164	236.714	210.647	576.516	594.697	503.676	699.083	1	134190963	134220225	male-specific lethal 2 homolog (Drosophila)
PPP2R3A	17.3042	20.8824	7.01292	31.4518	5.72159	25.0525	1	228.378	22.0233	1	95.3487	1	134225853	134372040	protein phosphatase 2, regulatory subunit B'', alpha
EPHB1	1	1	1	1	1	1	1	1	1	1	1	1	135192018	135658010	EPH receptor B1
KY	1	1	1	1	1	1	1	1	1	1	1	1	135841442	135849011	kyphoscoliosis peptidase
ANAPC13	28.1737	33.0328	65.6389	30.3239	20.8307	26.9767	40.2323	24.9345	24.5461	16.8185	72.8614	1	135946968	135950955	anaphase promoting complex subunit 13
AMOTL2	350.635	258.367	551.182	410.407	197.418	308.872	284.208	294.742	331.486	333.188	425.814	1	136057351	136070575	angiomotin like 2
RYK	544.474	456.087	444.453	755.527	452.384	1052.57	778.289	526.471	793.157	667.134	454.167	1	136182704	136290702	receptor-like tyrosine kinase
SLCO2A1	2.81158	8.73205	7.01292	23.5569	32.1625	5.8105	30.4242	45.6052	6.04559	7.15163	1.48885	1	136435601	136528512	solute carrier organic anion transporter family, member 2A1
RAB6B	17.3042	23.0916	34.071	114.912	43.4943	181.875	35.3282	42.3414	53.1377	32.6369	19.0876	1	136573371	136627767	RAB6B, member RAS oncogene family
TF	1	1	1	1	1	1	1	1	3.52279	1	1	1	136683642	136722207	transferrin
LOC525947	1	1	1	1	1	1	1	6.43966	1	1	1	1	136747202	136790625	serotransferrin-like
TOPBP1	3919.45	3543.39	3918.42	3859.35	3018.1	3284.65	4442.83	5044.65	4229.2	5363.46	4533.65	1	136833121	136902949	topoisomerase (DNA) II binding protein 1
CDV3	591.575	900.127	863.854	815.303	791.394	968.391	812.617	783.223	857.909	966.806	874.092	1	136949456	136961054	CDV3 homolog (mouse)
BFSP2	1	1	1	1	1	1	1	1	1	1	1	1	137030745	137107221	beaded filament structural protein 2, phakinin
NPHP3	82.5211	57.3335	8.51615	33.7075	79.3784	25.0525	52.4923	70.6276	131.344	16.8185	61.6178	1	137902567	137957087	nephronophthisis 3 (adolescent)
UBA5	250.998	244.007	173.871	232.208	122.817	79.4111	110.115	162.014	143.958	139.851	123.213	1	137962442	137993122	ubiquitin-like modifier activating enzyme 5
ACAD11	22.7389	42.974	44.5937	25.8126	14.2204	31.3061	27.9722	74.9793	59.0242	8.03043	6.37739	1	137993936	138111878	acyl-CoA dehydrogenase family, member 11
DNAJC13	4745.53	4269.09	3599.73	3863.86	2484.56	3689.69	3015.75	4568.14	3359.68	3520.61	1839.58	1	138140254	138277327	DnaJ (Hsp40) homolog, subfamily C, member 13
ACPP	64.4053	38.5557	41.5872	60.7757	42.55	69.3091	50.0403	166.366	44.7284	95.032	45.9745	1	138349815	138384832	acid phosphatase, prostate
KCNH8	11.8695	1	2.50323	3.25569	1	1	1	1	1	12.4245	1	1	138400619	138676649	potassium voltage-gated channel, subfamily H (eag-related), member 8
MIR2288	1	1	1	1	1	1	1	1	1	1	1	1	139318082	139318083	microRNA mir-2288
MRPL3	374.185	213.079	268.575	516.424	359.841	272.793	357.768	487.305	566.106	572.223	613.533	1	139880767	139937162	mitochondrial ribosomal protein L3
NUDT16	1	1	1	3.25569	1.94432	1	2.22601	1	1	22.0913	1	1	140045512	140046212	nudix (nucleoside diphosphate linked moiety X)-type motif 16
NEK11	6.43474	1	2.50323	1	1	29.3819	1	1	1	1	1	1	140061288	140330321	NIMA-related kinase 11
ATP2C1	511.865	414.113	346.743	421.685	354.175	489.266	324.666	466.635	262.53	313.854	287.957	1	140368300	140522546	ATPase, Ca++ transporting, type 2C, member 1
LOC100297522	1	1	1	1	1	1	1	1	1	1	1	1	140578415	140582777	60S ribosomal protein L38-like
PSMG1	115.129	81.6343	167.858	99.1223	223.859	123.668	176.319	197.916	127.981	161.821	196.052	1	140726758	140739207	proteasome (prosome, macropain) assembly chaperone 1
BRWD1	2638.66	3268.34	2042.39	2828.5	2310.8	3428.96	2649.18	2823.09	2296.74	2291.16	2383.67	1	140742535	140863306	bromodomain and WD repeat domain containing 1
HMGN1	669.473	503.584	587.26	896.507	363.618	557.575	734.153	749.497	392.033	561.677	377.417	1	140907750	140913228	high mobility group nucleosome binding domain 1
SETMAR	156.796	189.883	205.439	246.87	201.195	208.814	236.394	294.742	209.551	133.699	266.447	1	140923510	140932953	SET domain without mariner transposase fusion
WRB	10.0579	19.7778	5.50969	2.12784	23.6636	4.36735	15.7121	6.43966	32.9554	34.3946	4.91083	1	140944011	140958126	tryptophan rich basic protein
LCA5L	1	1	1	2.12784	1	1	1	1	1	1	1	1	140971622	140997067	Leber congenital amaurosis 5-like
SH3BGR	13.6811	3.20916	40.084	1	10.4432	66.9038	1	33.6379	1	6.27283	1	1	141029895	141097741	SH3 domain binding glutamic acid-rich protein
B3GALT5	35.42	6.5229	1	54.0086	18.942	145.315	58.6224	19.4948	8.56838	69.5467	1	1	141270104	141271040	UDP-Gal:betaGlcNAc beta 1,3-galactosyltransferase, polypeptide 5
IGSF5	49.9126	24.1962	31.0646	148.747	58.6034	33.2303	59.8484	72.8035	144.799	65.1527	332.443	1	141353864	141366183	immunoglobulin superfamily, member 5
PCP4	1	1	1	1	1	1	1	1	1	1	1	1	141459756	141531388	Purkinje cell protein 4
DSCAM	1	6.5229	2.50323	1	1	2.9242	1	8.61552	1	1	1.48885	1	141659022	141994736	Down syndrome cell adhesion molecule
BACE2	1	1	4.00646	3.25569	1	32.2682	1	1	1	1	1	1	142875108	142980405	beta-site APP-cleaving enzyme 2
FAM3B	1	1	1	1	1	1	1	1	1	1	1	1	143048275	143115094	family with sequence similarity 3, member B
MX2	1	1	2.50323	5.51137	1	25.5335	1	1	1	1.8788	1	1	143125835	143154499	myxovirus (influenza virus) resistance 2 (mouse)
MX1	13.6811	7.62747	2.50323	22.429	1	463.289	3.45202	695.1	11.9321	79.2136	1	1	143176082	143204486	myxovirus (influenza virus) resistance 1, interferon-inducible protein p78 (mouse)
TMPRSS2	1	5.41832	4.00646	1	1	12.5452	2.22601	6.43966	1	2.75761	1	1	143212386	143246161	transmembrane protease, serine 2
LOC783811	1	1	1	1	1	1	1	1	1	1	1	1	143360249	143360972	keratin-associated protein 10-8-like
KRTAP12-2	1	1	1	1	1	1	1	1	1	1	1	1	143370685	143371060	keratin-associated protein 12-2-like
RIPK4	46.2895	50.7061	83.6776	60.7757	20.8307	67.3849	24.2941	70.6276	35.4782	110.851	69.9283	1	143510609	143535443	receptor-interacting serine-threonine kinase 4
PRDM15	73.4632	116.981	61.1292	73.182	112.43	75.0817	40.2323	129.376	102.753	105.578	41.086	1	143569075	143637541	PR domain containing 15
C2CD2	106.072	97.0984	104.723	141.98	104.875	103.945	127.279	40.1655	127.14	160.942	66.0175	1	143645437	143706799	C2 calcium-dependent domain containing 2
ZNF295	48.1011	31.9282	10.0194	32.5796	58.6034	61.6123	58.6224	68.4518	37.16	140.73	168.677	1	143739694	143742838	zinc finger protein 295
UMODL1	1	1	1	1	1	1	1	1	1	1	1	1	143829674	143904907	uromodulin-like 1
LOC100847465	1	1	1	1	1	1	1	1	1	1	1	1	143989071	143990823	uncharacterized LOC100847465
ABCG1	1	6.5229	1	1	1	1	1	3.17586	1	1.8788	2.95541	1	143990493	144052766	ATP-binding cassette, sub-family G (WHITE), member 1
TFF3	6.43474	2.10458	2.50323	7.76706	2.88864	15.4315	1	9.70345	1	2.75761	20.5541	1	144067828	144071031	trefoil factor 3 (intestinal)
TFF2	1	1	1	1	1	1	1	1	1	1	1	1	144176928	144179988	trefoil factor 2
TFF1	1	1	1	1	1	1	1	1	1	1	1	1	144192320	144196549	trefoil factor 1
TMPRSS3	1	1	1	1	1	1	1	1	1	1	1	1	144222209	144242523	transmembrane protease, serine 3
UBASH3A	1	1	1	1	1	1	2.22601	1	1	1	1	1	144257057	144297415	ubiquitin associated and SH3 domain containing A
RSPH1	1	1	1	1	1.94432	1	1	1	1	1	1	1	144320258	144333283	radial spoke head 1 homolog (Chlamydomonas)
SLC37A1	48.1011	25.3007	43.0904	40.4745	35.9398	27.9388	43.9103	45.6052	21.1823	32.6369	11.7548	1	144364482	144436331	solute carrier family 37 (glycerol-3-phosphate transporter), member 1
PDE9A	1	15.3595	28.0581	1	1.94432	14.4694	1	18.4069	6.04559	3.63641	15.1768	1	144493954	144604522	phosphodiesterase 9A
WDR4	17.3042	5.41832	8.51615	1	9.49886	8.6968	3.45202	58.6604	13.614	21.2125	2.46656	1	144657517	144676864	WD repeat domain 4
NDUFV3	120.564	131.34	160.342	131.83	183.253	148.682	209.421	229.466	176.755	326.158	352.974	1	144690307	144701196	NADH dehydrogenase (ubiquinone) flavoprotein 3, 10kDa
PKNOX1	135.057	78.3205	98.7099	119.424	85.0443	204.003	99.0806	119.585	109.48	99.4261	130.546	1	144752391	144772642	PBX/knotted 1 homeobox 1
CBS	173.1	142.386	166.355	137.469	185.142	91.4374	287.886	60.8362	129.662	97.6685	89.9713	1	144791011	144809373	cystathionine-beta-synthase
U2AF1	135.057	156.746	244.523	113.784	186.086	200.636	187.353	185.948	200.301	222.459	258.626	1	144832583	144845371	U2 small nuclear RNA auxiliary factor 1
CRYAA	1	1	1	1	1	1	1	1	1	1	1	1	144887648	144890204	crystallin, alpha A
SUMO3	73.4632	82.7388	113.742	93.4831	100.153	148.682	85.5945	68.4518	86.775	133.699	109.037	1	145033004	145041249	SMT3 suppressor of mif two 3 homolog 3 (S. cerevisiae)
PTTG1IP	131.434	253.949	237.007	116.04	207.806	189.572	138.313	277.335	179.277	152.154	161.833	1	145059495	145075393	pituitary tumor-transforming 1 interacting protein
ITGB2	1	1	1	1	1	1	1	2.08793	5.20465	1	4.42197	1	145104826	145121459	integrin, beta 2 (complement component 3 receptor 3 and 4 subunit)
FAM207A	2.81158	4.31374	1	1	4.77727	1	8.35605	10.7914	3.52279	1	3.44427	1	145154690	145178581	family with sequence similarity 207, member A
ADARB1	1	27.5099	5.50969	22.429	19.8864	8.6968	24.2941	8.61552	1	45.819	22.5096	1	145518104	145555780	adenosine deaminase, RNA-specific, B1
POFUT2	78.8979	70.5885	98.7099	52.8808	59.5477	48.6239	78.2385	155.486	26.2279	76.5772	40.1083	1	145597355	145610036	protein O-fucosyltransferase 2
ICOSLG	196.651	99.3075	56.6195	141.98	317.347	182.356	166.511	160.926	137.231	182.912	308.489	1	145687748	145695788	inducible T-cell co-stimulator ligand
DNMT3L	1	1	1	1	1	1	1	1	1	1	1	1	145703733	145718122	DNA (cytosine-5-)-methyltransferase 3-like
AIRE	1	1	1	2.12784	4.77727	1.48105	1	1	1	1	1	1	145747979	145760199	autoimmune regulator
PFKL	497.373	432.89	522.621	580.711	605.364	560.942	618.908	749.497	344.941	592.435	513.807	1	145770081	145796773	phosphofructokinase, liver
C1H21orf2	2.81158	7.62747	11.5226	3.25569	17.0534	9.6589	7.13004	28.1983	6.04559	6.27283	5.88853	1	145802952	145813241	chromosome 1 open reading frame, human C21orf2
TRPM2	1	1	1	1	30.2739	1	1	1	1	1	2.46656	1	145830609	145871493	transient receptor potential cation channel, subfamily M, member 2
LRRC3	1	3.20916	25.0517	2.12784	1	5.32945	23.0681	97.8259	1	1	1	1	145886335	145887109	leucine rich repeat containing 3
LOC780781	1	1	1	1	1	1	1	1	1	1	1	1	145901590	145902232	keratin associated protein
LOC100299102	1	1	1	1	1	1	1	1	1	1	1	1	145922174	145922861	uncharacterized LOC100299102
KRTAP10-8	1	1	1	1	1	1	1	1	1	1	1	1	145933649	145934306	keratin associated protein 10-8
TSPEAR	1	3.20916	4.00646	1	1	3.8863	2.22601	1	1	1	1	1	145941425	146036324	thrombospondin-type laminin G domain and EAR repeats
KRTAP10-11	1	1	2.50323	1	1	1	1	1	1	1	1	1	145976434	145977244	keratin associated protein 10-11
KRTAP10-12	1	1	1	1	1	1	1	1	1	1	1	1	145987285	145988191	keratin associated protein 10-12
LOC100295858	1	1	1	1	1	1	1	1	1	1	2.95541	1	146010005	146010491	keratin associated protein 12-2-like
LOC100336639	1	1	1	1	1	1	1	1	1	1	1	1	146023191	146023192	keratin associated protein 10-11-like
LOC617218	1	1	1	1	1	1	1	1	1	1	1	1	146028113	146028971	keratin associated protein LOC617218
KRTAP10-2	1	1	1	1	1	1	2.22601	1	1	1	1	1	146076329	146077070	keratin associated protein 10-2
KRTAP10-7	1	1	1	6.63922	1	1	1	1	1	1	1	1	146084751	146085576	keratin associated protein 10-7
LOC783329	1	1	1	1	1	1	1	1	1	1	1	1	146092106	146092886	keratin associated protein 10-9-like
LOC783535	1	1	1	1	1	1	1	1	1	1	1	1	146097264	146097969	keratin associated protein 10-9-like
LOC100300014	1	1	1	1	1	1	1	1	1	1	1	1	146107494	146108334	uncharacterized LOC100300014
UBE2G2	140.492	186.569	113.742	117.168	80.3227	133.77	107.663	158.75	114.526	111.729	190.675	1	146115139	146120823	ubiquitin-conjugating enzyme E2G 2
SIK1	91.579	49.6015	62.6324	109.273	105.819	136.175	62.3004	101.09	48.9331	188.185	113.925	1	146145068	146216697	salt-inducible kinase 1
HSF2BP	13.6811	14.2549	38.5807	15.662	19.8864	31.3061	46.3623	36.9017	48.9331	46.6978	22.5096	1	146346453	146435890	heat shock transcription factor 2 binding protein
RRP1B	1189.4	1495.5	1292.27	1674.72	1951.02	1754.91	1675.73	1577.41	1320.42	1932.61	2301.54	1	146437175	146461658	ribosomal RNA processing 1B
PDXK	749.182	546.662	914.964	542.365	665.8	576.817	719.441	501.449	594.697	563.435	630.154	1	146491014	146516434	pyridoxal (pyridoxine, vitamin B6) kinase
CSTB	720.197	544.453	845.815	898.763	1159.68	414.222	378.61	866.994	767.929	1052.93	1023.68	1	146528137	146532096	cystatin B (stefin B)
RRP1	229.259	196.511	379.814	188.222	361.73	290.592	363.898	250.136	198.619	352.522	397.949	1	146569122	146582957	ribosomal RNA processing 1 homolog (S. cerevisiae)
AGPAT3	68.0284	81.6343	164.852	40.4745	60.492	121.262	91.7246	134.816	99.3889	73.0619	98.7707	1	146718436	146735008	1-acylglycerol-3-phosphate O-acyltransferase 3
TRAPPC10	604.256	701.303	642.879	832.22	552.482	596.54	1055.37	746.233	1001.71	857.834	663.396	1	146767817	146839781	trafficking protein particle complex 10
PWP2	116.941	145.7	133.284	100.25	121.873	69.7901	88.0466	100.002	92.6615	152.154	159.877	1	146844057	146856980	PWP2 periodic tryptophan protein homolog (yeast)
C1H21orf33	8.24632	45.1832	14.5291	31.4518	47.2716	46.6997	59.8484	37.9897	82.5703	57.2435	21.5318	1	146859219	146867556	chromosome 1 open reading frame, human C21orf33
COL18A1	1	5.41832	19.0388	2.12784	1	8.6968	3.45202	4.26379	1	1	1	1	146989243	147040792	collagen, type XVIII, alpha 1
SLC19A1	44.4779	8.73205	91.1938	208.523	135.093	210.738	181.223	34.7259	90.1387	47.5766	22.9984	1	147044705	147063014	solute carrier family 19 (folate transporter), member 1
PCBP3	35.42	54.0198	16.0323	35.9631	43.4943	66.4228	41.4583	58.6604	42.2056	51.0918	1.48885	1	147333236	147359843	poly(rC) binding protein 3
COL6A1	2.81158	2.10458	1	4.38353	1	2.44315	13.2601	2.08793	20.3414	28.2429	2.95541	1	147404614	147422878	collagen, type VI, alpha 1
COL6A2	1	2.10458	10.0194	14.5341	36.8841	18.3178	21.8421	14.0552	22.0233	50.213	11.2659	1	147555517	147569955	collagen, type VI, alpha 2
FTCD	1	1	1	1	1	1	1	1	1	1	1	1	147582844	147598126	formiminotransferase cyclodeaminase
LSS	22.7389	42.974	23.5484	17.9176	32.1625	30.344	39.0063	35.8138	39.6828	18.5761	16.1545	1	147625688	147654101	lanosterol synthase (2,3-oxidosqualene-lanosterol cyclase)
MCM3AP	347.012	484.806	318.181	293.111	464.66	480.126	534.313	318.676	466.035	495.767	359.818	1	147665916	147706423	minichromosome maintenance complex component 3 associated protein
YBEY	6.43474	8.73205	2.50323	2.12784	1.94432	3.8863	1	3.17586	2.68186	2.75761	2.95541	1	147708053	147711938	ybeY metallopeptidase (putative)
PCNT	1051.72	701.303	539.156	1065.68	851.831	779.339	802.809	472.074	1173.26	1068.75	838.895	1	147736440	147840556	pericentrin
LOC100847825	11.8695	6.5229	13.0258	24.6847	36.8841	9.6589	12.0341	8.61552	8.56838	24.7277	26.4204	1	147856271	147856272	uncharacterized LOC100847825
DIP2A	62.5937	59.5427	44.5937	48.3694	86.933	42.3703	64.7524	44.5173	53.1377	49.3342	15.6656	1	147856756	147977092	DIP2 disco-interacting protein 2 homolog A (Drosophila)
S100B	17.3042	17.5687	8.51615	14.5341	14.2204	24.5714	5.90403	6.43966	6.04559	5.39402	3.44427	1	148010726	148013820	S100 calcium binding protein B
MIR2289	1	1	1	1	1	1	1	1	1	1	1	1	148057013	148057014	microRNA mir-2289
PRMT2	29.9853	54.0198	44.5937	32.5796	110.541	42.3703	32.8762	90.2104	60.7061	89.7592	35.2197	1	148058570	148078280	protein arginine methyltransferase 2
LOC522736	1	1	1	1	1	1	1	1	1	1	1	1	148124102	148177577	aryl hydrocarbon receptor-like
FBXO25	17.3042	7.62747	7.01292	17.9176	25.5523	12.0641	5.90403	26.0224	12.773	37.9098	12.2436	1	148277253	148294187	F-box protein 25
C1H8orf42	140.492	146.804	119.755	191.605	126.594	120.3	156.703	135.904	110.321	69.5467	127.124	1	148301329	148347073	chromosome 1 open reading frame, human C8orf42
RUNX1	15.4926	15.3595	37.0775	22.429	21.775	22.1662	19.3901	63.0121	16.9777	59.8799	44.0191	1	148678709	148948599	runt-related transcription factor 1
MIR2285A	1	1	1	1	1	1	1	1	1	1	1	1	148908169	148908170	microRNA mir-2285a
SETD4	147.738	128.027	88.1873	125.063	142.648	150.607	213.099	102.178	168.345	108.214	120.769	1	150025826	150045152	SET domain containing 4
CBR1	17.3042	9.83663	19.0388	2.12784	16.1091	25.0525	21.8421	6.43966	12.773	10.6669	33.7532	1	150054321	150064553	carbonyl reductase 1
LOC100337155	1	1	1	1	1	1	1	1	1	1	1	1	150074070	150074071	carbonyl reductase [NADPH] 1-like
MGC127133	11.8695	5.41832	1	1	3.83295	1.48105	1	4.26379	1.84093	1.8788	1	1	150108574	150110305	20-beta-hydroxysteroid dehydrogenase-like
CBR3	1	7.62747	2.50323	1	12.3318	4.36735	1	3.17586	1	1	1.97771	1	150144302	150153882	carbonyl reductase 3
DOPEY2	98.8253	104.83	62.6324	144.236	138.87	256.437	191.031	148.959	144.799	154.791	250.804	1	150169935	150293309	dopey family member 2
MORC3	385.055	350.047	340.73	319.052	195.53	381.991	279.304	430.733	401.283	307.703	341.731	1	150307584	150348753	MORC family CW-type zinc finger 3
CHAF1B	399.547	433.995	411.382	509.657	618.584	308.391	553.93	294.742	275.984	454.463	501.586	1	150361039	150386109	chromatin assembly factor 1, subunit B (p60)
CLDN14	1	1	1	1	1	1	1	1	1	1	1	1	150439866	150440580	claudin 14
LOC100847516	2.81158	1	1	1	1	1	1	1	1	1	1	1	150675557	150690289	single-minded homolog 2-like
SIM2	2.81158	8.73205	1	1	1	1.48105	1	1	1	1	5.39968	1	150690366	150728567	single-minded homolog 2 (Drosophila)
HLCS	87.9558	97.0984	49.1033	73.182	145.481	87.1079	24.2941	104.353	116.208	63.3951	81.1719	1	150735333	150919818	holocarboxylase synthetase (biotin-(proprionyl-CoA-carboxylase (ATP-hydrolysing)) ligase)
PIGP	11.8695	44.0786	55.1163	15.662	7.61023	15.4315	39.0063	41.2535	23.7051	8.90924	7.35509	1	151008644	151020725	phosphatidylinositol glycan anchor biosynthesis, class P
TTC3	142.303	173.314	97.2067	253.637	142.648	284.338	264.592	167.454	119.571	93.2744	117.836	1	151034216	151139605	tetratricopeptide repeat domain 3
DSCR3	466.576	321.328	492.556	566.049	421.222	459.922	664.27	376.336	541.719	255.853	549.982	1	151166704	151199072	Down syndrome critical region gene 3
DYRK1A	4807.12	5677.43	3919.92	5410.14	3447.76	5208.85	5250.77	3223.45	5518.35	5591.95	5361.28	1	151320081	151411483	dual-specificity tyrosine-(Y)-phosphorylation regulated kinase 1A
KCNJ6	1	1	1	1	1	1	1	1	1	1	1	1	151517914	151651424	potassium inwardly-rectifying channel, subfamily J, member 6
KCNJ15	1	1	1	1	1	8.21575	1	1	1	2.75761	1	1	152304331	152305459	potassium inwardly-rectifying channel, subfamily J, member 15
ERG	1	1	1	1	1	1	1	1	4.36372	2.75761	1	1	152380782	152515066	v-ets erythroblastosis virus E26 oncogene homolog (avian)
ETS2	111.506	55.1244	119.755	104.762	98.2648	122.225	85.5945	254.488	173.391	59.8799	66.9952	1	152880459	152889961	v-ets erythroblastosis virus E26 oncogene homolog 2 (avian)
LOC100847346	1	1	1	1	1	1	1	1	1	1	1	1	153055489	153070015	uncharacterized LOC100847346
PIK3R4	2631.41	3012.08	2532.44	3051.82	2416.57	3045.08	2091.34	2059.37	2410.27	2640.05	2024.36	1	153235281	153320113	phosphoinositide-3-kinase, regulatory subunit 4
COL6A6	1	8.73205	4.00646	55.1365	23.6636	19.2799	26.7462	22.7586	16.9777	11.5457	23.4872	1	153323615	153438333	collagen, type VI, alpha 6
LOC100336592	2.81158	1	2.50323	1	9.49886	1	1	6.43966	2.68186	1	1	1	153905850	153905851	collagen alpha-4(VI) chain-like
CAPN7	107.883	150.118	130.278	100.25	173.81	126.073	91.7246	31.4621	84.2522	22.0913	128.591	1	153971501	154021415	calpain 7
SH3BP5	66.2168	41.8694	77.6647	107.017	15.1648	59.207	86.8206	51.0448	56.5014	21.2125	14.199	1	154024463	154103515	SH3-domain binding protein 5 (BTK-associated)
METTL6	20.9274	19.7778	2.50323	8.8949	10.4432	17.8367	20.6161	23.8466	6.04559	21.2125	2.46656	1	154171508	154186589	methyltransferase like 6
EAF1	223.824	164.478	234.001	162.282	145.481	119.819	97.8546	132.64	196.937	103.82	98.7707	1	154187643	154199553	ELL associated factor 1
COLQ	1	1	1	1	1	1	1	1	1	1	1	1	154220046	154285649	collagen-like tail subunit (single strand of homotrimer) of asymmetric acetylcholinesterase
HACL1	55.3474	36.3465	23.5484	34.8353	50.1046	63.5365	15.7121	28.1983	75.8428	12.4245	26.9092	1	154337627	154375944	2-hydroxyacyl-CoA lyase 1
BTD	15.4926	1	11.5226	23.5569	11.3875	7.7347	3.45202	3.17586	28.7507	27.3641	8.3328	1	154398775	154416661	biotinidase
ANKRD28	497.373	703.512	611.311	505.146	416.5	691.307	640.976	566.724	557.696	661.861	585.18	1	154443368	154575201	ankyrin repeat domain 28
LOC100848527	1	1	1	1	1	1	1	1	1	1	1	1	154657085	154669240	uncharacterized LOC100848527
GALNTL2	1	1	1	7.76706	1.94432	2.9242	1	1	11.0912	1.8788	1.97771	1	154923158	154967310	UDP-N-acetyl-alpha-D-galactosamine:polypeptide N-acetylgalactosaminyltransferase-like 2
DPH3	131.434	101.517	85.1809	74.3098	101.098	140.504	115.019	132.64	112.003	168.852	139.345	1	155006191	155009642	DPH3, KTI11 homolog (S. cerevisiae)
OXNAD1	133.245	105.935	137.794	151.003	110.541	105.388	113.793	135.904	65.7517	86.244	109.525	1	155019994	155158529	oxidoreductase NAD-binding domain containing 1
RFTN1	1	1	1	1	1	1	1	1	1	1	1	1	155093670	155283662	raftlin, lipid raft linker 1
DAZL	1	2.10458	4.00646	6.63922	1	13.5073	1	1	2.68186	12.4245	1	1	155385367	155406303	deleted in azoospermia-like
PLCL2	53.5358	125.817	151.323	73.182	46.3273	54.3965	143.217	127.2	81.7294	62.5163	26.9092	1	155618262	155831623	phospholipase C-like 2
TBC1D5	153.173	164.478	125.768	163.409	136.982	168.886	130.957	226.202	93.5024	109.972	82.6385	1	155833977	156185917	TBC1 domain family, member 5
SATB1	28.1737	26.4053	25.0517	19.0455	15.1648	18.7988	15.7121	4.26379	48.0921	49.3342	19.5764	1	157171131	157246177	SATB homeobox 1
LOC100139888	1	1	1	1	1	1	1	1	1	1	1	1	158172897	158172898	heterogeneous nuclear ribonucleoprotein C-like
LOC100297040	1	1	1	1	1	1	1	1	1	1	1	1	158295757	158299185	histone H2B type 1-like
HERC2	6881.38	6258.44	4522.71	8225.23	6765.15	7537.13	5200.5	6302.3	5765.58	5508.47	3694.78	2	646690	878049	HECT and RLD domain containing E3 ubiquitin protein ligase 2
NIPA1	125.999	59.5427	67.1421	88.9718	109.597	101.539	61.0744	47.7811	93.5024	96.7897	122.236	2	878957	963744	non imprinted in Prader-Willi/Angelman syndrome 1
NIPA2	685.777	635.028	823.267	622.442	1098.3	929.426	837.137	540.614	828.476	606.496	874.092	2	982817	994159	non imprinted in Prader-Willi/Angelman syndrome 2
CYFIP1	1595.19	1988.14	2209.24	1489.75	1885.86	1835.24	1497.96	1696	2180.69	1792	2237.02	2	996691	1073032	cytoplasmic FMR1 interacting protein 1
TUBGCP5	529.981	758.741	579.743	492.74	519.431	418.551	398.227	390.48	426.511	602.102	386.216	2	1162771	1212914	tubulin, gamma complex associated protein 5
CCDC115	196.651	251.739	172.368	179.199	266.353	204.484	246.202	400.271	244.029	175.003	276.713	2	1244966	1247797	coiled-coil domain containing 115
IMP4	71.6516	61.7518	70.1486	59.6478	94.4875	56.8018	53.7183	89.1225	114.526	143.366	87.527	2	1248573	1252545	IMP4, U3 small nucleolar ribonucleoprotein, homolog (yeast)
PTPN18	82.5211	41.8694	143.807	68.6706	44.4386	48.6239	59.8484	190.3	56.5014	71.3043	49.8853	2	1263606	1279366	protein tyrosine phosphatase, non-receptor type 18 (brain-derived)
FAM123C	1	1	1	1	1	1	1	1	1	1	1	2	1404183	1406607	family with sequence similarity 123C
ARHGEF4	1	8.73205	13.0258	8.8949	6.66591	7.25365	14.4861	28.1983	11.9321	4.51522	13.2213	2	1644728	1681064	Rho guanine nucleotide exchange factor (GEF) 4
FAM168B	165.854	167.791	163.349	191.605	156.812	125.592	101.533	235.993	147.322	149.518	107.57	2	1798349	1824545	family with sequence similarity 168, member B
PLEKHB2	537.227	458.296	599.285	494.995	433.498	659.557	690.016	518.855	503.036	617.921	321.199	2	1865723	1896626	pleckstrin homology domain containing, family B (evectins) member 2
HS6ST1	2.81158	3.20916	2.50323	2.12784	6.66591	10.14	3.45202	1	1.84093	7.15163	6.86624	2	4111870	4149283	heparan sulfate 6-O-sulfotransferase 1
UGGT1	4553.5	5241.12	5113.48	4652.22	4297.65	4890.87	5421.18	4416.91	5224.02	4755.33	4589.87	2	4226353	4333329	UDP-glucose glycoprotein glucosyltransferase 1
SAP130	289.041	282.668	133.284	338.225	112.43	341.102	221.681	221.85	212.074	334.946	200.941	2	4383953	4460959	Sin3A-associated protein, 130kDa
AMMECR1L	202.085	205.347	232.497	210.779	340.01	357.939	275.626	279.51	166.663	254.096	279.158	2	4541471	4548460	AMME chromosomal region gene 1-like
POLR2D	301.722	260.576	396.349	228.824	511.876	656.19	350.412	289.302	524.9	218.065	278.18	2	4554356	4565444	polymerase (RNA) II (DNA directed) polypeptide D
WDR33	443.025	353.361	521.117	354.015	411.778	256.437	409.261	599.362	495.467	522.131	471.766	2	4656366	4717334	WD repeat domain 33
SFT2D3	1	1	1	1	1	1	1	1	1	1	1	2	4722618	4723260	SFT2 domain containing 3
LIMS2	6.43474	2.10458	16.0323	3.25569	5.72159	7.25365	18.1641	12.9672	5.20465	23.8489	34.7309	2	4780251	4818515	LIM and senescent cell antigen-like domains 2
GPR17	1	1	1	1	11.3875	1.48105	1	8.61552	1	1	7.35509	2	4807000	4808020	G protein-coupled receptor 17
MYO7B	33.6084	15.3595	1	37.091	41.6057	6.29155	1	9.70345	2.68186	1	4.91083	2	4820013	4905244	myosin VIIB
IWS1	1584.32	1505.44	1054.76	1168.32	995.367	1109.82	1418.27	1302.17	1200.17	1237.48	985.062	2	4945532	4990922	IWS1 homolog (S. cerevisiae)
LOC507930	1	1	1	1	1	1	1	1	1	1	1	2	5016210	5016211	Ras-related GTP binding C pseudogene
PROC	1	2.10458	2.50323	1	9.49886	2.44315	1	1	1	1	1	2	5034547	5044955	protein C (inactivator of coagulation factors Va and VIIIa)
MAP3K2	189.404	102.621	59.626	107.017	114.318	77.0059	94.1766	57.5724	148.163	65.1527	85.0828	2	5131707	5166290	mitogen-activated protein kinase kinase kinase 2
ERCC3	194.839	177.733	241.517	264.915	352.286	216.029	219.229	246.873	273.462	251.459	343.197	2	5181086	5211002	excision repair cross-complementing rodent repair deficiency, complementation group 3 (xeroderma pig
CYP27C1	1	5.41832	1	19.0455	29.3296	1	1	1	20.3414	1	1	2	5230205	5251050	cytochrome P450, family 27, subfamily C, polypeptide 1
LOC524236	1	1	1	1	1	1	1	1	1	1	1	2	5345308	5345701	histone cluster 1, H2ai-like
BIN1	93.3905	179.942	218.968	174.688	119.04	126.554	106.437	151.135	88.4568	102.941	57.707	2	5350726	5407349	bridging integrator 1
MIR2350	1	1	1	1	1	1	1	1	1	1	1	2	5398901	5398902	microRNA mir-2350
NAB1	278.172	324.642	256.549	293.111	262.576	457.516	436.233	635.264	249.916	139.851	246.893	2	5569360	5603678	NGFI-A binding protein 1 (EGR1 binding protein 1)
TMEM194B	40.8547	33.0328	50.6066	67.5427	38.7727	21.2041	26.7462	30.3742	58.1833	13.3033	49.3965	2	5719421	5743659	transmembrane protein 194B
MFSD6	345.2	69.4839	43.0904	198.373	167.2	169.367	431.329	213.147	165.822	158.306	136.412	2	5753449	5814559	major facilitator superfamily domain containing 6
INPP1	28.1737	6.5229	26.5549	38.2188	9.49886	58.2449	27.9722	114.145	35.4782	38.7886	1	2	5867979	5886849	inositol polyphosphate-1-phosphatase
HIBCH	42.6663	60.6473	59.626	42.7302	96.3761	63.0554	78.2385	83.6828	33.7963	123.154	79.2165	2	5878675	6032556	3-hydroxyisobutyryl-CoA hydrolase
C2H2orf88	6.43474	5.41832	4.00646	8.8949	3.83295	9.17785	1	2.08793	1	4.51522	1	2	6038478	6038766	small membrane A-kinase anchor protein
MSTN	1	1	1	1	1	6.7726	5.90403	1	14.4549	11.5457	1	2	6213698	6218689	myostatin
LOC100335809	1	1	1	1	1	1	1	1	1	1	1	2	6346409	6357340	protease-like
PMS1	160.419	92.6801	100.213	73.182	123.761	39.0029	106.437	40.1655	50.6149	77.456	79.7054	2	6395193	6498919	PMS1 postmeiotic segregation increased 1 (S. cerevisiae)
ORMDL1	40.8547	68.3793	17.5355	32.5796	70.8795	39.484	27.9722	27.1104	53.9786	36.1522	18.5987	2	6512636	6522000	ORM1-like 1 (S. cerevisiae)
OSGEPL1	6.43474	5.41832	35.5743	44.9859	1.94432	21.2041	14.4861	18.4069	37.16	28.2429	16.1545	2	6532949	6541950	O-sialoglycoprotein endopeptidase-like 1
ASNSD1	89.7674	95.9938	92.697	126.191	113.374	122.706	81.9165	22.7586	87.6159	122.275	61.6178	2	6605519	6611557	asparagine synthetase domain containing 1
SLC40A1	8.24632	26.4053	37.0775	47.2416	32.1625	14.4694	12.0341	40.1655	33.7963	14.1821	23.9761	2	6717941	6739026	solute carrier family 40 (iron-regulated transporter), member 1
LOC100848294	1	1	1	1	1	1	1	1	1	1	1	2	6801869	6824920	uncharacterized LOC100848294
WDR75	256.433	312.491	415.891	246.87	422.166	278.085	271.948	338.259	351.668	284.854	326.576	2	6876304	6916079	WD repeat domain 75
COL5A2	1	1	1	1	1	1	1	1	1.84093	1.8788	1	2	7139758	7298551	collagen, type V, alpha 2
MIR2917	1	1	1	1	1	1	1	1	1	1	1	2	7214274	7214275	microRNA mir-2917
COL3A1	1	1	1	1	1	1	1	1	1	24.7277	1	2	7318226	7356829	collagen, type III, alpha 1
LOC100848318	1	1	1	1	1	1	1	1	1	1	1	2	7746160	7750928	uncharacterized LOC100848318
GULP1	22.7389	25.3007	22.0452	20.1733	15.1648	31.3061	16.9381	74.9793	11.0912	35.2734	1	2	7830324	7907003	GULP, engulfment adaptor PTB domain containing 1
TFPI	73.4632	142.386	145.31	164.537	136.038	18.7988	141.991	78.2431	161.618	59.0011	55.7516	2	8835690	8883986	tissue factor pathway inhibitor (lipoprotein-associated coagulation inhibitor)
CALCRL	1	1	1	11.1506	3.83295	1.48105	3.45202	1	1.84093	1	1	2	8981051	9028168	calcitonin receptor-like
ZSWIM2	1	1	1	1	1	1	1	1	1	1	1	2	9502290	9523394	zinc finger, SWIM-type containing 2
FAM171B	22.7389	18.6733	16.0323	37.091	11.3875	72.1954	35.3282	74.9793	23.7051	68.6679	1	2	9567190	9590366	family with sequence similarity 171, member B
ITGAV	211.143	241.798	197.923	140.853	176.643	178.988	197.161	367.633	264.211	246.186	88.5048	2	9651630	9760100	integrin, alpha V (vitronectin receptor, alpha polypeptide, antigen CD51)
MIR2351	1	1	1	1	1	1	1	1	1	1	1	2	9700748	9700749	microRNA mir-2351
ZC3H15	924.905	753.218	830.783	740.865	731.902	885.17	632.394	895.28	677.949	873.653	701.038	2	9849856	9870152	erythropoietin 4 immediate early response-like
FSIP2	2.81158	6.5229	2.50323	1	2.88864	5.8105	34.1022	21.6707	4.36372	48.4554	2.46656	2	10581445	10763702	fibrous sheath interacting protein 2
ZNF804A	1	1	1	1	1	1	1	1	1	1	1	2	11593229	11940242	zinc finger protein 804A
LOC614531	10.0579	2.10458	7.01292	2.12784	2.88864	22.6472	1	6.43966	13.614	2.75761	2.95541	2	11700813	11701755	ras-related GTP binding A-like
NUP35	464.764	407.485	433.93	461.16	351.342	386.802	473.013	507.976	585.447	745.347	541.672	2	13455817	13487161	nucleoporin 35kDa
DUSP19	4.62316	9.83663	4.00646	1	4.77727	6.7726	2.22601	3.17586	1.84093	1	13.7102	2	13505040	13519811	dual specificity phosphatase 19
NCKAP1	470.199	383.184	376.807	381.083	332.456	341.583	341.83	468.811	313.826	356.037	423.858	2	13574039	13664656	NCK-associated protein 1
FRZB	1	1	1	1	1	1	1	2.08793	1	1	1	2	13724924	13760672	frizzled-related protein
DNAJC10	354.258	292.609	315.175	286.344	256.91	183.799	285.434	269.719	167.504	138.093	178.943	2	13825965	13871901	DnaJ (Hsp40) homolog, subfamily C, member 10
PDE1A	1	1	1	1	1	1	1	1	1	1	1	2	14175951	14479750	phosphodiesterase 1A, calmodulin-dependent
PPP1R1C	1	1	1	5.51137	1	1	1	1	1	1	1	2	14502889	14623643	protein phosphatase 1, regulatory (inhibitor) subunit 1C
SSFA2	2343.37	1862.22	2688.77	2237.51	1273.94	2631.86	1859.63	4577.93	2131.92	1006.35	1355.61	2	14684937	14751322	sperm specific antigen 2
LOC100847482	1	1	1	1	1	1	1	1	1	1	1	2	14858598	14864520	uncharacterized LOC100847482
NEUROD1	1	2.10458	1	1	1	1	1	1	1	1	1	2	14953995	14955066	neurogenic differentiation 1
CERKL	1	1	1	1	1	1	1	1	1	1	1	2	14975681	15114969	ceramide kinase-like
ITGA4	1	1	1	1	1	7.25365	3.45202	1	1	1	1	2	15116000	15207458	integrin, alpha 4 (antigen CD49D, alpha 4 subunit of VLA-4 receptor)
UBE2E3	698.458	819.493	609.808	702.518	801.782	414.703	664.27	492.745	997.503	883.319	734.769	2	15671796	15761795	ubiquitin-conjugating enzyme E2E 3
CWC22	805.341	1041.51	766.144	1040.87	899.047	798.581	891.082	1007.34	602.266	687.346	1046.66	2	16837597	16882498	CWC22 spliceosome-associated protein homolog (S. cerevisiae)
ZNF385B	1	1	1	1	1	1	1	4.26379	1	1	1	2	17084654	17448607	zinc finger protein 385B
SESTD1	20.9274	37.4511	11.5226	21.3012	30.2739	45.7376	14.4861	66.2759	32.9554	22.9701	22.0207	2	17676587	17730629	SEC14 and spectrin domains 1
TTN	3279.96	3788.6	2146.11	6858.29	7025.78	12944.6	4142.46	2428.18	6894.95	2241.95	3111.08	2	18057346	18329808	titin
PLEKHA3	86.1442	140.177	46.0969	147.62	153.98	169.367	235.168	71.7155	139.754	190.822	182.365	2	18383075	18410160	pleckstrin homology domain containing, family A (phosphoinositide binding specific) member 3
FKBP7	1	5.41832	1	2.12784	1	1	1	3.17586	1.84093	1	1	2	18413964	18421434	FK506 binding protein 7
DFNB59	1	1	4.00646	1	1	1	1	1	1	1	1.48885	2	18424892	18431102	deafness, autosomal recessive 59
PRKRA	1	10.9412	1	3.25569	4.77727	8.6968	1	1	1.84093	1	1	2	18433195	18449544	protein kinase, interferon-inducible double stranded RNA dependent activator
OSBPL6	220.201	461.61	588.763	139.725	271.075	422.4	219.229	845.235	351.668	289.248	369.107	2	18476972	18564896	oxysterol binding protein-like 6
RBM45	113.318	114.772	113.742	164.537	123.761	124.63	110.115	134.816	102.753	60.7587	188.72	2	18762520	18776242	RNA binding motif protein 45
CYCT	1	1	1	5.51137	1	1	1	1	3.52279	1	1	2	18786406	18799705	cytochrome c, testis
PDE11A	1	1	1	1	1	1	1	1	1	1	1	2	18823637	19247650	phosphodiesterase 11A
TTC30A	4.62316	8.73205	22.0452	8.8949	1.94432	5.8105	3.45202	7.52759	6.88652	1	1	2	19257270	19259265	tetratricopeptide repeat domain 30A
TTC30B	4.62316	5.41832	1	1	1	1	1	1	3.52279	1	1.48885	2	19323626	19325621	tetratricopeptide repeat domain 30B
AGPS	1091.57	770.892	1236.65	752.143	811.225	595.578	739.057	905.071	779.702	926.381	558.293	2	19341047	19433176	alkylglycerone phosphate synthase
NFE2L2	1448.45	1695.42	1871.02	1710.81	2096.44	2818.51	2521.67	3210.4	1557.56	2256.01	1685.1	2	19659630	19691556	nuclear factor (erythroid-derived 2)-like 2
HNRNPA3	314.403	199.824	369.291	226.569	276.741	289.63	252.332	290.39	243.188	249.702	264.003	2	19700827	19705981	heterogeneous nuclear ribonucleoprotein A3
MTX2	77.0863	126.922	97.2067	253.637	80.3227	108.274	64.7524	88.0345	152.368	203.125	95.3487	2	20603668	20678743	metaxin 2
HOXD1	1	1	1	1	1	1	1	1	1	1	1	2	20759889	20761196	homeobox D1
LOC100295298	1	1	1	1	1	1	1	1	1	1	1	2	20769779	20770731	uncharacterized LOC100295298
LOC100847387	1	1	1	1	1	1	1	1	1	1	1	2	20771156	20776118	serine/arginine repetitive matrix protein 3-like
HOXD3	2.81158	2.10458	7.01292	16.7898	1	6.7726	7.13004	1	1	1	1	2	20776407	20779812	homeobox D3
HOXD4	55.3474	18.6733	17.5355	15.662	1	28.9009	68.4304	6.43966	10.2502	1.8788	1.48885	2	20795144	20796465	homeobox D4
MIR10B	1	1	1	1	1	1	1	1	1	1	1	2	20797703	20797704	microRNA mir-10b
HOXD8	1	2.10458	1	1	1	7.7347	1	1	1.84093	1	1.48885	2	20817055	20818282	homeobox D8
HOXD9	24.5505	12.0458	5.50969	29.1961	15.1648	23.6093	16.9381	16.231	16.9777	19.4549	17.1322	2	20824493	20826774	homeobox D9
HOXD10	1	1	2.50323	1	1	3.40525	1	1	1	1	1	2	20829622	20832001	homeobox D10
HOXD11	6.43474	1	1	1	1	1.48105	1	1	1	1	1	2	20839759	20841537	homeobox D11
HOXD12	1	1	1	1	1	1	1	1	1	1	1	2	20848043	20849004	homeobox D12
LOC100849025	1	1	1	1	1	1	1	1	1	1	1	2	20851244	20851721	uncharacterized LOC100849025
KIAA1715	64.4053	86.0526	97.2067	54.0086	53.8818	54.3965	43.9103	157.662	49.774	88.8804	104.148	2	20946954	21011178	KIAA1715
LOC532409	1	1	1	1	1	1.48105	1	1	1	1	1	2	21060666	21061224	high mobility group box 3 pseudogene
LOC100847478	1	1	1	1	1	8.21575	2.22601	1	1	1	1	2	21077127	21120041	uncharacterized LOC100847478
ATP5G3	49.9126	75.0068	53.613	97.9945	85.9886	75.0817	62.3004	44.5173	44.7284	92.3956	68.9506	2	21702461	21705118	ATP synthase, H+ transporting, mitochondrial Fo complex, subunit C3 (subunit 9)
ATF2	823.457	659.329	635.363	1127.72	853.719	631.656	639.75	1169.44	1153.92	1004.59	1119.5	2	21773615	21830229	activating transcription factor 2
CHN1	40.8547	21.987	34.071	101.378	121.873	146.758	45.1363	27.1104	132.185	216.307	114.414	2	21880794	22080558	chimerin (chimaerin) 1
CHRNA1	167.665	91.5755	61.1292	111.529	50.1046	82.2974	40.2323	142.431	96.0252	135.457	81.6608	2	22120317	22137668	cholinergic receptor, nicotinic, alpha 1 (muscle)
WIPF1	270.925	341.21	262.562	260.404	140.759	217.953	357.768	118.497	378.578	204.883	183.342	2	22266543	22291708	WAS/WASL interacting protein family, member 1
GPR155	82.5211	48.4969	116.749	97.9945	85.9886	158.784	127.279	55.3966	138.913	36.1522	132.502	2	22359362	22394126	G protein-coupled receptor 155
SCRN3	2.81158	1	1	21.3012	1	2.44315	5.90403	4.26379	3.52279	8.03043	18.5987	2	22401271	22429660	secernin 3
CIR1	252.809	182.151	217.465	349.504	273.908	187.647	229.037	151.135	313.826	350.764	186.764	2	22432932	22474367	corepressor interacting with RBPJ, 1
SP9	1	1	1	1	1	1	1	1	1	1	1	2	22485429	22487883	Sp9 transcription factor homolog (mouse)
OLA1	39.0432	52.9152	91.1938	57.3922	61.4364	42.8513	53.7183	86.9466	77.5247	97.6685	135.924	2	22566198	22728348	Obg-like ATPase 1
SP3	703.893	864.781	862.351	932.598	681.853	604.718	719.441	614.593	535.832	845.531	854.538	2	22832779	22888525	Sp3 transcription factor
CDCA7	35.42	61.7518	94.2002	35.9631	109.597	14.9504	16.9381	107.617	43.0465	29.1217	96.3264	2	23378819	23390636	cell division cycle associated 7
ZAK	240.128	224.125	112.239	151.003	303.182	451.263	370.028	317.588	229.733	109.093	177.476	2	23443012	23595180	sterile alpha motif and leucine zipper containing kinase AZK
RAPGEF4	1	1	1	1	1	1	1	1	1	1	1	2	23646128	23974945	Rap guanine nucleotide exchange factor (GEF) 4
PDK1	926.717	981.866	776.666	808.536	437.275	660.038	886.178	418.766	941.161	588.041	693.705	2	24067818	24107467	pyruvate dehydrogenase kinase, isozyme 1
ITGA6	69.84	97.0984	121.258	120.551	83.1557	109.717	61.0744	136.991	116.208	97.6685	123.213	2	24134497	24217715	integrin, alpha 6
MIR2352	1	1	1	1	1	1	1	1	1	1	1	2	24194814	24194815	microRNA mir-2352
DLX2	1	2.10458	1	2.12784	1	2.9242	1	1	1	1	1	2	24489338	24491347	distal-less homeobox 2
DLX1	1	1	1	1	1	1	1	1	1	1	1	2	24503923	24506507	distal-less homeobox 1
METAP1D	10.0579	26.4053	41.5872	23.5569	45.383	8.21575	25.5202	28.1983	2.68186	49.3342	30.3312	2	24512440	24526177	methionyl aminopeptidase type 1D (mitochondrial)
HAT1	278.172	447.25	342.233	304.39	411.778	215.548	197.161	364.369	389.51	182.912	322.666	2	24607149	24644456	histone acetyltransferase 1
SLC25A12	29.9853	9.83663	31.0646	5.51137	57.6591	11.5831	25.5202	66.2759	33.7963	70.4255	79.7054	2	24678646	24776305	solute carrier family 25 (mitochondrial carrier, Aralar), member 12
DYNC1I2	799.906	819.493	902.938	1150.27	770.619	622.997	799.131	1059.56	754.474	910.562	1202.6	2	24807356	24859469	dynein, cytoplasmic 1, intermediate chain 2
CYBRD1	1	1	2.50323	7.76706	1.94432	18.7988	3.45202	9.70345	1	7.15163	1	2	24956533	24987909	cytochrome b reductase 1
DCAF17	183.969	118.085	134.787	57.3922	98.2648	83.2595	94.1766	122.848	181.8	106.457	54.7739	2	25046027	25070380	DDB1 and CUL4 associated factor 17
METTL8	68.0284	130.236	157.336	137.469	14.2204	26.4956	45.1363	61.9242	46.4103	124.911	22.0207	2	25117251	25154848	methyltransferase like 8
TLK1	1087.95	1301.09	978.099	1111.93	778.174	1051.61	1208.62	949.676	1318.74	1146.96	1091.14	2	25314921	25493123	tousled-like kinase 1
GORASP2	4029.95	3229.68	3154.78	2902.94	2605.43	4321.79	3929.13	3518.28	4249.38	5419.71	5075.79	2	25567062	25599076	golgi reassembly stacking protein 2, 55kDa
GAD1	1	1	1	1	1	1	1	1	7.72745	1	1	2	25648032	25684122	glutamate decarboxylase 1 (brain, 67kDa)
SP5	1	1	1	1	1	1	1	1	1	42.3038	1	2	25773542	25776191	Sp5 transcription factor
UBR3	810.776	878.036	572.227	849.138	535.484	625.884	666.722	750.585	639.267	570.465	481.543	2	26362900	26565223	ubiquitin protein ligase E3 component n-recognin 3 (putative)
METTL5	19.1158	34.1374	23.5484	28.0682	27.4409	24.5714	12.0341	26.0224	11.0912	19.4549	10.2882	2	26582942	26592883	methyltransferase like 5
SSB	482.88	481.492	591.769	409.279	560.036	412.779	476.691	581.956	354.191	471.16	580.291	2	26592947	26599717	Sjogren syndrome antigen B (autoantigen La)
KLHL23	46.2895	1	46.0969	26.9404	20.8307	35.6356	54.9444	39.0776	17.8186	1	9.31051	2	26619584	26636478	kelch-like 23 (Drosophila)
PHOSPHO2	2.81158	7.62747	8.51615	1	21.775	3.40525	12.0341	20.5828	9.40931	1	3.93312	2	26660805	26661531	phosphatase, orphan 2
PPIG	1854.25	1468.99	1379.46	1584.49	1257.89	1206.99	1298.12	1211.87	1105.14	1187.39	989.461	2	26695559	26717435	peptidylprolyl isomerase G (cyclophilin G)
FASTKD1	62.5937	18.6733	37.0775	39.3467	57.6591	38.5219	51.2663	16.231	53.9786	33.5158	16.1545	2	26742610	26776228	FAST kinase domains 1
KBTBD10	6.43474	5.41832	5.50969	7.76706	2.88864	1	1	1	1	1	2.95541	2	26780988	26798002	kelch repeat and BTB (POZ) domain containing 10
BBS5	8.24632	24.1962	17.5355	6.63922	13.2761	1.9621	1	4.26379	5.20465	1.8788	1	2	26800972	26821626	Bardet-Biedl syndrome 5
LRP2	17964.6	21215.5	14571.8	10689.6	12876.8	16562.6	11171.2	19724.1	16516	9625.66	13088.6	2	26902752	27078328	low density lipoprotein receptor-related protein 2
DHRS9	11.8695	5.41832	8.51615	21.3012	22.7193	27.9388	2.22601	90.2104	5.20465	11.5457	1	2	27117084	27123557	dehydrogenase/reductase (SDR family) member 9
ABCB11	1	1	1	1	1	1	1	1	1	1	1	2	27176813	27258734	ATP-binding cassette, sub-family B (MDR/TAP), member 11
G6PC2	1	1	1	1	1	1	1	1	1	1	1	2	27274584	27281293	glucose-6-phosphatase, catalytic, 2
SPC25	223.824	116.981	164.852	222.057	234.247	494.076	301.372	219.674	233.938	404.371	273.291	2	27297981	27309012	SPC25, NDC80 kinetochore complex component, homolog (S. cerevisiae)
NOSTRIN	24.5505	21.987	5.50969	26.9404	26.4966	8.21575	8.35605	15.1431	59.0242	25.6065	6.86624	2	27317715	27380451	nitric oxide synthase trafficker
CERS6	2.81158	1	1	1	1.94432	1.9621	1	2.08793	1	11.5457	1	2	27407916	27653182	ceramide synthase 6
MIR2353	1	1	1	1	1	1	1	1	1	1	1	2	27629886	27629887	microRNA mir-2353
STK39	19.1158	10.9412	2.50323	6.63922	5.72159	1	5.90403	1	27.0689	1	1.48885	2	27924730	28017172	serine threonine kinase 39
LOC100847850	1	1	1	2.12784	1	1	1	10.7914	1	8.90924	1.48885	2	28277595	28279048	uncharacterized LOC100847850
B3GALT1	1	1	7.01292	1	5.72159	4.36735	1	2.08793	3.52279	5.39402	1	2	28400754	28401735	UDP-Gal:betaGlcNAc beta 1,3-galactosyltransferase, polypeptide 1
XIRP2	1	2.10458	13.0258	5.51137	28.3852	1	3.45202	46.6931	22.0233	8.90924	19.5764	2	29080499	29428855	xin actin-binding repeat containing 2
SCN7A	1	1	1	1	1	1	1	1	1	1	1	2	29933319	29994583	sodium channel, voltage-gated, type VII, alpha subunit
LOC780963	1	1	1	2.12784	1	1	1	1	1	1	1	2	30088133	30092690	uncharacterized LOC780963
SCN9A	8.24632	34.1374	19.0388	1	1.94432	5.32945	3.45202	30.3742	1	1.8788	1	2	30093696	30184429	sodium channel, voltage-gated, type IX, alpha subunit
SCN1A	2.81158	2.10458	1	20.1733	1	22.6472	1	5.35173	12.773	1	1	2	30321634	30415283	sodium channel, voltage-gated, type I, alpha subunit
TTC21B	55.3474	26.4053	55.1163	19.0455	39.7171	14.4694	53.7183	46.6931	71.6382	26.4853	24.9538	2	30433161	30530728	tetratricopeptide repeat domain 21B
GALNT3	140.492	165.582	77.6647	197.245	87.8773	65.4607	183.675	184.86	156.572	185.549	204.852	2	30642214	30665653	UDP-N-acetyl-alpha-D-galactosamine:polypeptide N-acetylgalactosaminyltransferase 3 (GalNAc-T3)
CSRNP3	1	1	1	1	1	1	1	1	1	1	1	2	30717074	30792078	cysteine-serine-rich nuclear protein 3
SCN2A	1	1	1	8.8949	1	3.8863	1	1	1	1	1	2	30983623	31067356	sodium channel, voltage-gated, type II, alpha subunit
SCN3A	1	1	1	1	1	2.44315	2.22601	1	1	1	1	2	31196565	31283753	sodium channel, voltage-gated, type III, alpha subunit
SLC38A11	11.8695	10.9412	16.0323	15.662	17.9977	15.4315	27.9722	34.7259	12.773	28.2429	3.44427	2	31391904	31446840	solute carrier family 38, member 11
COBLL1	4339.73	5341.64	5089.43	3074.37	2013.34	3582.9	3276.89	3308.31	3220.08	2812.29	2266.84	2	31542569	31698638	cordon-bleu WH2 repeat protein-like 1
GRB14	1	1	1	1	1	4.8484	1	1	1.84093	1	1	2	31783532	31911351	growth factor receptor-bound protein 14
FIGN	127.811	145.7	41.5872	56.2643	103.931	23.1283	34.1022	27.1104	27.9098	47.5766	9.79936	2	32727852	32852428	fidgetin
GCA	452.083	463.819	1374.95	1053.28	372.117	1452.33	470.561	1315.22	175.914	186.428	78.2388	2	34175353	34192912	grancalcin, EF-hand calcium binding protein
IFIH1	4.62316	1	1	6.63922	2.88864	8.6968	1	22.7586	7.72745	12.4245	1	2	34217172	34272207	interferon induced with helicase C domain 1
FAP	1	1	1	1	1	1	1	1	1	1	1	2	34299338	34376531	fibroblast activation protein, alpha
GCG	1	1	1	1	1	1	1	1	1	1	1	2	34401306	34407923	glucagon
DPP4	64.4053	13.1504	88.1873	84.4604	83.1557	129.921	70.8825	61.9242	24.5461	7.15163	59.6624	2	34487935	34571758	dipeptidyl-peptidase 4
SLC4A10	11.8695	1	1	1	1.94432	1	1	2.08793	1	1	21.043	2	34585181	34826739	solute carrier family 4, sodium bicarbonate transporter, member 10
TBR1	2.81158	1	14.5291	1	6.66591	1	1	15.1431	1	1	1.97771	2	35063833	35071440	T-box, brain, 1
PSMD14	149.549	82.7388	182.891	132.958	174.755	240.563	162.833	258.84	241.506	300.672	306.044	2	35076572	35175784	proteasome (prosome, macropain) 26S subunit, non-ATPase, 14
TANK	635.053	418.531	635.363	549.132	568.535	1086.25	625.038	863.73	643.471	514.222	589.091	2	35247869	35300073	TRAF family member-associated NFKB activator
RBMS1	283.606	188.778	164.852	204.012	225.748	215.067	302.598	344.786	429.875	166.215	352.974	2	35960408	36177636	RNA binding motif, single stranded interacting protein 1
ITGB6	2.81158	1	1	1	2.88864	10.621	1	1	1	1	1	2	36256576	36348700	integrin, beta 6
PLA2R1	1	45.1832	13.0258	97.9945	61.4364	110.198	7.13004	114.145	29.5917	51.9706	25.4427	2	36374219	36507042	phospholipase A2 receptor 1, 180kDa
LY75	1	5.41832	1	1	3.83295	1.48105	1	4.26379	6.88652	17.6973	16.1545	2	36557430	36647343	lymphocyte antigen 75
CD302	4.62316	3.20916	5.50969	1	2.88864	6.7726	4.67802	1	1	21.2125	1	2	36656348	36679402	CD302 molecule
BAZ2B	589.763	596.368	467.001	619.058	342.843	635.986	317.31	820.213	553.492	261.126	332.443	2	36998169	37150472	bromodomain adjacent to zinc finger domain, 2B
WDSUB1	24.5505	37.4511	52.1098	29.1961	33.1068	35.6356	25.5202	49.9569	69.9563	6.27283	5.88853	2	37169484	37235880	WD repeat, sterile alpha motif and U-box domain containing 1
TANC1	106.072	67.2747	119.755	103.634	91.6546	123.668	83.1425	55.3966	97.707	117.002	155.478	2	37239773	37407155	tetratricopeptide repeat, ankyrin repeat and coiled-coil containing 1
DAPL1	1	2.10458	1	3.25569	1	1.9621	1	1	7.72745	1	1	2	37593376	37619991	death associated protein-like 1
PKP4	816.211	1186.21	1068.29	963.05	1005.75	1177.17	1108.09	1219.48	818.385	663.618	744.546	2	37815705	37929695	plakophilin 4
CCDC148	1	1	1	1	2.88864	1	1	1	1	1	1	2	38092380	38302357	coiled-coil domain containing 148
UPP2	1	1	1	1	1	1	1	1	1	1	1	2	38328003	38363667	uridine phosphorylase 2
ACVR1C	1	1	1	1	1	1	1	1	1	1	1	2	38551515	38599514	activin A receptor, type IC
CYTIP	1	1	1	1	1	1	1	1	1	1	1	2	38682067	38710144	cytohesin 1 interacting protein
ERMN	1	1	1	1	1	3.8863	1	1	1	1	1	2	38780589	38785319	ermin, ERM-like protein
GALNT5	1	1	1	1	1	1	1	1	1	1	1	2	38796688	38838127	UDP-N-acetyl-alpha-D-galactosamine:polypeptide N-acetylgalactosaminyltransferase 5 (GalNAc-T5)
ACVR1	810.776	442.832	760.131	375.444	732.847	643.202	718.215	671.166	783.066	774.348	894.624	2	39307563	39360417	activin A receptor, type I
GPD2	133.245	151.223	214.459	178.071	77.4898	148.682	141.991	392.655	87.6159	48.4554	39.1306	2	39766330	39877436	glycerol-3-phosphate dehydrogenase 2 (mitochondrial)
NR4A2	15.4926	16.4641	7.01292	8.8949	19.8864	8.6968	2.22601	47.7811	1	29.1217	2.95541	2	40011974	40016378	nuclear receptor subfamily 4, group A, member 2
KCNJ3	1	1	1	1	1	1	1	1	1	1	1	2	41361198	41491255	potassium inwardly-rectifying channel, subfamily J, member 3
GALNT13	1	1	1	2.12784	1	1	1	1	1	1	1	2	41791845	42371758	UDP-N-acetyl-alpha-D-galactosamine:polypeptide N-acetylgalactosaminyltransferase 13 (GalNAc-T13)
RPRM	1	1	1	1	1	1	1	1	1	1	1	2	42763118	42763448	reprimo, TP53 dependent G2 arrest mediator candidate
LOC785568	104.26	141.282	200.93	162.282	166.256	171.292	182.449	143.519	158.254	207.519	112.947	2	43382648	43382649	mortality factor 4 like 1 pseudogene
ARL6IP6	118.753	62.8564	97.2067	82.2047	118.095	30.8251	63.5264	122.848	54.8196	37.9098	40.1083	2	43544353	43584221	ADP-ribosylation-like factor 6 interacting protein 6
PRPF40A	1395.92	1450.21	1638.02	1248.39	1818.81	1366.7	1485.7	1848.31	1613.91	1707.64	1607.86	2	43585375	43642994	PRP40 pre-mRNA processing factor 40 homolog A (S. cerevisiae)
FMNL2	366.939	384.289	468.504	411.535	284.295	444.528	263.366	1075.88	479.49	354.279	236.627	2	43651076	43979392	formin-like 2
STAM2	17.3042	18.6733	25.0517	3.25569	24.608	24.0904	9.58206	7.52759	16.9777	15.9397	31.7978	2	44110117	44145084	signal transducing adaptor molecule (SH3 domain and ITAM motif) 2
LOC100847279	164.042	140.177	173.871	171.304	176.643	128.478	202.065	83.6828	159.095	103.82	175.032	2	44146282	44166545	signal transducing adapter molecule 2-like
CACNB4	1	1	1	1	1	1	1	1	1	1	1	2	44185983	44457832	calcium channel, voltage-dependent, beta 4 subunit
ARL5A	78.8979	46.2877	115.245	107.017	114.318	122.706	103.985	82.5949	72.4791	110.851	154.5	2	44469159	44491115	ADP-ribosylation factor-like 5A
NEB	145.926	104.83	71.6518	184.838	85.0443	160.709	102.759	340.435	143.117	123.154	101.215	2	44547339	44754663	nebulin
RIF1	4749.15	5368.15	3515.55	4178.53	4546	3517.47	3981.85	4342.94	6168.39	5026	5575.39	2	44763232	44818737	RAP1 interacting factor homolog (yeast)
TNFAIP6	1	1	1	1	1	1	1	1	1	1	1	2	44850891	44867229	tumor necrosis factor, alpha-induced protein 6
NMI	24.5505	3.20916	5.50969	17.9176	35.9398	53.4344	35.3282	32.55	16.1368	76.5772	68.4618	2	44939206	44950265	N-myc (and STAT) interactor
RBM43	1	1	1	1	1	1	1	1	1	1	1	2	44961747	44971592	RNA binding motif protein 43
RND3	825.268	625.087	809.738	412.663	966.093	1162.25	693.695	567.812	645.994	931.654	858.938	2	45800706	45820240	Rho family GTPase 3
MMADHC	265.491	152.327	331.711	244.614	207.806	175.14	251.106	181.597	164.141	130.184	151.567	2	46649133	46664363	methylmalonic aciduria (cobalamin deficiency) cblD type, with homocystinuria
LYPD6	1	13.1504	7.01292	1	1	2.9242	1	10.7914	4.36372	1	1	2	46723404	46759004	LY6/PLAUR domain containing 6
KIF5C	723.82	956.461	1203.58	577.328	443.885	1337.36	789.323	1387.02	396.238	464.13	304.578	2	47329992	47471605	kinesin family member 5C
MIR2354	1	1	1	1	1	1	1	1	1	1	1	2	47459083	47459084	microRNA mir-2354
EPC2	327.084	454.982	345.24	510.785	678.076	637.429	344.282	678.781	470.239	647.8	885.336	2	47525291	47651142	enhancer of polycomb homolog 2 (Drosophila)
MBD5	160.419	232.962	185.897	314.54	185.142	156.86	181.223	326.292	262.53	227.731	218.051	2	47800889	47858040	methyl-CpG binding domain protein 5
PTMA	716.574	1130.98	1182.54	1144.63	392.892	1206.51	1423.17	1206.43	603.947	1208.48	995.817	2	47998758	47999088	prothymosin, alpha (gene sequence 28)
ORC4	571.647	533.407	521.117	426.197	547.76	770.199	780.741	355.666	508.922	582.768	469.81	2	48326486	48377766	origin recognition complex, subunit 4
ACVR2A	28.1737	14.2549	16.0323	60.7757	8.55455	10.14	14.4861	12.9672	19.5005	59.8799	57.2181	2	48384097	48476212	activin A receptor, type IIA
SNRPD1	484.692	321.328	393.343	367.549	363.618	428.653	420.295	552.581	471.08	494.009	622.333	2	49735994	49736399	small nuclear ribonucleoprotein D1 polypeptide 16kDa
LOC781064	1	1	1	1	1	1	1	1	1	1	1	2	50197139	50197448	NADH dehydrogenase (ubiquinone) 1 alpha subcomplex, 12 pseudogene
LOC510454	1	1	1	1	1	1	1	1	1	1	1	2	50562442	50562443	sorting nexin 6
LOC613677	1	1	1	1	1	1	1	1	1	1	1	2	52274980	52276785	uncharacterized LOC613677
ZEB2	1	1	1	19.0455	1	1	1	1	1	1	5.88853	2	52277923	52364164	zinc finger E-box binding homeobox 2
GTDC1	55.3474	58.4381	80.6712	157.77	33.1068	128.478	73.3345	91.2983	65.7517	156.548	194.097	2	52584333	52896941	glycosyltransferase-like domain containing 1
ARHGAP15	15.4926	3.20916	19.0388	40.4745	76.5455	33.7114	12.0341	11.8793	26.2279	44.9402	60.6401	2	53065586	53732838	Rho GTPase activating protein 15
KYNU	2.81158	6.5229	1	4.38353	19.8864	1.48105	1	1	1.84093	1	1	2	53844213	53956734	kynureninase
LOC100848327	1	1	1	1	1	1	1	1	1	1	1	2	54596464	54619994	uncharacterized LOC100848327
LRP1B	1	1	1	7.76706	1	1	1	1	1	1	1	2	54816522	56930432	low density lipoprotein receptor-related protein 1B
NXPH2	1	1	1	1	1	1	1	1	1	1	1	2	58582495	58711855	neurexophilin 2
SPOPL	113.318	91.5755	85.1809	69.7984	107.708	87.589	119.923	196.828	117.889	152.154	87.527	2	58798301	58817943	speckle-type POZ protein-like
HNMT	1	1	1	1	1	1	1	1	1	1	1	2	59377262	59417325	histamine N-methyltransferase
HNRNPA1L2	1	1	1	1	1	1.48105	1	1	1	1	1.48885	2	60615827	60616790	heterogeneous nuclear ribonucleoprotein A1-like 2
CXCR4	1	1	1	2.12784	1	1.9621	1	1	1	1	1	2	61582212	61585315	chemokine (C-X-C motif) receptor 4
DARS	680.342	378.766	453.472	473.566	496.767	218.916	539.218	963.819	423.147	808.621	651.664	2	61722490	61787612	aspartyl-tRNA synthetase
MCM6	5169.44	5647.61	5187.14	4201.09	8083.42	4729.72	5464.09	5337.3	5155.07	5035.67	5304.08	2	61821954	61856092	minichromosome maintenance complex component 6
LCT	1	1	14.5291	15.662	24.608	2.44315	1	1	1	1.8788	1	2	61867079	61884820	lactase
UBXN4	167.665	225.23	133.284	162.282	210.639	163.595	203.291	345.874	255.802	228.61	182.365	2	61920138	61949527	UBX domain protein 4
LOC100297008	1	1	1	1	1	1	1	1	1	1	1	2	61949871	61951271	uncharacterized LOC100297008
LOC100847709	1	1	1	1	1	1	1	1	1	1	1	2	61961707	61961708	uncharacterized LOC100847709
R3HDM1	644.111	762.055	536.15	752.143	1027.47	546.992	817.521	740.794	951.252	941.321	1099.94	2	61969458	62016633	R3H domain containing 1
MIR128-1	1	1	1	1	1	1	1	1	1	1	1	2	62007832	62007833	microRNA mir-128-1
ZRANB3	482.88	490.329	436.937	350.631	238.968	331.481	271.948	484.042	392.033	349.006	184.809	2	62162397	62433185	zinc finger, RAN-binding domain containing 3
RAB3GAP1	432.156	464.923	339.227	517.552	350.398	452.225	306.276	210.971	248.234	313.854	321.688	2	62458038	62568124	RAB3 GTPase activating protein subunit 1 (catalytic)
YSK4	1	1	1	1	1	1	1	1	1	1	1	2	62601166	62642560	YSK4 Sps1/Ste20-related kinase homolog (S. cerevisiae)
CCNT2	571.647	670.375	620.331	536.725	525.097	629.732	442.363	640.704	626.653	595.072	549.005	2	62651958	62681201	cyclin T2
ACMSD	1	1	1	1	1	1	1	1	1	1	1	2	62692906	62753559	aminocarboxymuconate semialdehyde decarboxylase
TMEM163	11.8695	31.9282	1	31.4518	4.77727	16.3936	18.1641	2.08793	8.56838	4.51522	2.46656	2	62843381	63111290	transmembrane protein 163
MGAT5	977.441	823.911	970.583	1063.43	746.067	890.942	1294.44	703.804	809.976	1187.39	730.369	2	63118921	63362056	mannosyl (alpha-1,6-)-glycoprotein beta-1,6-N-acetyl-glucosaminyltransferase
NCKAP5	8.24632	9.83663	2.50323	15.662	1	62.5744	25.5202	54.3087	103.594	6.27283	27.3981	2	64170567	65141757	NCK-associated protein 5
LYPD1	20.9274	57.3335	20.542	68.6706	26.4966	32.2682	34.1022	9.70345	38.8419	26.4853	37.664	2	65217260	65277297	LY6/PLAUR domain containing 1
GPR39	1	2.10458	1	1	1	1	1	1	1	1	1	2	65526344	65527197	G protein-coupled receptor 39
SLC35F5	20.9274	37.4511	38.5807	23.5569	36.8841	26.4956	15.7121	58.6604	38.001	17.6973	15.6656	2	65682855	65719138	solute carrier family 35, member F5
LOC100847374	8.24632	1	1	1	5.72159	1.48105	8.35605	1	1.84093	1	1.48885	2	65864522	65864523	uncharacterized LOC100847374
ACTR3	1890.48	1552.93	2132.58	1908.18	1708.33	1685.16	2009.2	2629.44	1925.89	2376.41	1555.06	2	65864816	65912606	ARP3 actin-related protein 3 homolog (yeast)
LOC781039	1	1	1	1	1	1	1	1	1	1	1	2	66273031	66295953	uncharacterized LOC781039
DPP10	1	1	1	1	1	1	1	1	1	1	1	2	67307866	68110779	dipeptidyl-peptidase 10 (non-functional)
DDX18	216.578	284.877	309.162	222.057	304.126	167.443	285.434	116.321	149.845	228.61	325.11	2	69859860	69874876	DEAD (Asp-Glu-Ala-Asp) box polypeptide 18
LOC523484	1	1	1	1	1	1	1	4.26379	1	1	1	2	69899472	69917270	5-hydroxytryptamine receptor 5B-like
CCDC93	160.419	189.883	139.297	132.958	55.7705	149.644	124.827	85.8587	69.1154	35.2734	98.7707	2	69929308	70029393	coiled-coil domain containing 93
INSIG2	44.4779	10.9412	28.0581	49.4973	21.775	15.9125	54.9444	73.8914	27.0689	24.7277	39.1306	2	70137446	70142319	insulin induced gene 2
LOC100848049	8.24632	6.5229	13.0258	8.8949	5.72159	7.7347	8.35605	11.8793	11.0912	35.2734	24.465	2	70428972	70432726	uncharacterized LOC100848049
MARCO	1	1	1	1	1	1	1	1	1	1	1	2	71099130	71133924	macrophage receptor with collagenous structure
C1QL2	1	1	1	1	2.88864	1	1	1	1	1	1	2	71283903	71285350	complement component 1, q subcomponent-like 2
STEAP3	1375.99	2192.48	2164.15	1470.58	2249.42	1273.86	1437.88	1602.44	1125.32	1730.49	1707.59	2	71387739	71424474	STEAP family member 3, metalloreductase
C2H2orf76	39.0432	36.3465	13.0258	30.3239	50.1046	32.7493	43.9103	213.147	80.8884	170.609	75.3057	2	71473647	71516886	chromosome 2 open reading frame, human C2orf76
DBI	260.056	207.556	310.665	252.509	450.495	407.487	230.263	556.933	446.693	368.34	447.812	2	71561315	71566152	diazepam binding inhibitor (GABA receptor modulator, acyl-CoA binding protein)
TMEM37	37.2316	136.863	109.233	266.043	451.44	272.312	59.8484	134.816	389.51	488.736	899.024	2	71607793	71613428	transmembrane protein 37
SCTR	1	1	1	5.51137	1	2.9242	1	1	1	1	1	2	71616444	71714867	secretin receptor
PCDP1	1	7.62747	1	1	23.6636	11.5831	2.22601	1	13.614	1	7.84395	2	71765138	71882657	primary ciliary dyskinesia protein 1
TMEM177	22.7389	8.73205	25.0517	4.38353	2.88864	7.7347	5.90403	5.35173	1	1.8788	5.39968	2	71893634	71894570	transmembrane protein 177
PTPN4	196.651	295.923	206.942	251.381	178.532	184.28	195.935	330.643	112.003	103.82	184.809	2	71992464	72146309	protein tyrosine phosphatase, non-receptor type 4 (megakaryocyte)
EPB41L5	164.042	136.863	188.904	178.071	218.193	166.962	191.031	226.202	122.935	117.881	142.767	2	72172306	72248985	erythrocyte membrane protein band 4.1 like 5
TMEM185B	20.9274	28.6145	41.5872	51.7529	42.55	22.6472	23.0681	40.1655	13.614	22.9701	38.1529	2	72356581	72357634	transmembrane protein 185B
RALB	127.811	144.595	148.316	37.091	148.314	156.86	132.183	231.641	78.3656	124.033	53.7962	2	72412120	72429235	v-ral simian leukemia viral oncogene homolog B (ras related; GTP binding protein)
INHBB	1	1	2.50323	1	1.94432	1	1	1	1.84093	1	1	2	72523470	72527172	inhibin, beta B
LOC781979	1	1	2.50323	4.38353	1	1	1	1	1	1	1	2	72592433	72592434	T-complex protein 1 subunit zeta-like
GLI2	2.81158	5.41832	8.51615	5.51137	1.94432	23.1283	7.13004	5.35173	26.2279	14.1821	1	2	72977074	73168370	GLI family zinc finger 2
TFCP2L1	245.563	280.459	333.214	132.958	218.193	325.709	202.065	292.566	236.461	151.276	252.271	2	73380231	73441557	transcription factor CP2-like 1
CLASP1	2354.24	2702.8	3605.74	5278.18	4349.59	2975.81	2818.37	4536.59	4546.23	4843.21	4343.97	2	73491070	73723487	cytoplasmic linker associated protein 1
TSN	359.693	323.537	352.756	373.188	420.277	442.123	495.081	616.769	359.237	575.738	345.153	2	73827203	73833315	translin
LOC784679	1	1	1	1	1	1	1	1	1	1	1	2	74646309	74646840	peptidylprolyl isomerase A (cyclophilin A)-like
CNTNAP5	1	1	1	1	1	1	1	1	1	1	1	2	76541397	77285994	contactin associated protein-like 5
LOC789626	1	1	1	1	1	1	1	1	1	1	1	2	77949051	77950456	signal-induced proliferation-associated 1 like 1-like
GYPC	1	3.20916	1	1	1	1	1	1	1	19.4549	1	2	79255967	79303925	glycophorin C (Gerbich blood group)
LOC100295717	1	1	1	1	1	1	1	1	1	1	1	2	79550874	79553406	uncharacterized LOC100295717
GLS	19.1158	42.974	19.0388	13.4063	26.4966	40.4461	31.6502	61.9242	11.0912	30.8793	16.6433	2	79798439	79851939	glutaminase
STAT1	1131.43	875.827	1125.42	1178.47	1356.1	1156.48	1092.15	1218.4	1190.92	844.652	1237.8	2	79894278	79923701	signal transducer and activator of transcription 1, 91kDa
STAT4	39.0432	1	1	67.5427	40.6614	2.9242	1	8.61552	26.2279	21.2125	1.97771	2	79939583	80041309	signal transducer and activator of transcription 4
MYO1B	2823.44	3268.34	2786.48	2701.06	2114.38	2483.7	2766.87	3124.45	2675.16	2625.11	2297.14	2	80201454	80368470	myosin IB
SDPR	1	1	1	1	1	1	5.90403	1	1	1	1	2	80859701	80871115	serum deprivation response
TMEFF2	1	1	1	1	1	1	1	24.9345	8.56838	1	1	2	80997965	81275416	transmembrane protein with EGF-like and two follistatin-like domains 2
SLC39A10	167.665	182.151	217.465	514.169	523.208	272.793	264.592	695.1	145.64	102.941	164.766	2	84734001	84770606	solute carrier family 39 (zinc transporter), member 10
DNAH7	11.8695	6.5229	7.01292	4.38353	1.94432	12.5452	1	1	2.68186	3.63641	2.95541	2	84773413	85028029	dynein, axonemal, heavy chain 7
STK17B	8.24632	3.20916	5.50969	2.12784	8.55455	1.9621	8.35605	6.43966	1	1	15.6656	2	85078053	85094689	serine/threonine kinase 17b
HECW2	252.809	163.373	109.233	320.18	576.09	423.843	221.681	221.85	364.282	437.766	565.137	2	85137278	85387383	HECT, C2 and WW domain containing E3 ubiquitin protein ligase 2
CCDC150	2.81158	13.1504	19.0388	7.76706	2.88864	14.9504	7.13004	3.17586	1.84093	14.1821	1.48885	2	85640912	85726445	coiled-coil domain containing 150
GTF3C3	260.056	208.661	191.91	199.5	129.427	153.974	168.963	163.102	101.912	184.67	120.28	2	85760491	85792671	general transcription factor IIIC, polypeptide 3, 102kDa
C2H2orf66	1	1	1	1	1	1	1	1	4.36372	1	1	2	85799096	85806605	chromosome 2 open reading frame, human C2orf66
PGAP1	142.303	183.256	160.342	54.0086	122.817	138.099	175.093	422.03	144.799	142.487	90.4602	2	85835324	85909825	post-GPI attachment to proteins 1
ANKRD44	97.0137	157.85	74.6582	22.429	81.267	90.9563	95.4026	67.3638	120.412	108.214	126.635	2	85967997	86152174	ankyrin repeat domain 44
SF3B1	5589.72	5670.8	6063.52	5753	4854.8	5078	6970.86	4124.26	4424.3	5065.55	6195.26	2	86351772	86387018	splicing factor 3b, subunit 1, 155kDa
COQ10B	84.3326	63.961	61.1292	87.8439	160.59	196.306	135.861	251.224	105.275	156.548	214.14	2	86410901	86426934	coenzyme Q10 homolog B (S. cerevisiae)
HSPD1	546.285	555.499	745.099	708.158	864.107	655.709	611.552	993.194	697.291	814.773	932.754	2	86439453	86447989	heat shock 60kDa protein 1 (chaperonin)
HSPE1	267.302	194.301	261.059	319.052	331.511	204.965	378.61	238.169	183.482	573.102	311.911	2	86449568	86451439	heat shock 10kDa protein 1 (chaperonin 10)
MOBKL3	58.9705	68.3793	61.1292	29.1961	42.55	22.1662	19.3901	12.9672	54.8196	31.7582	23.9761	2	86464354	86492132	MOB1, Mps One Binder kinase activator-like 3 (yeast)
RFTN2	1	1	1	1	1	1	1	19.4948	1	6.27283	1	2	86505772	86561416	raftlin family member 2
MARS2	31.7968	51.8106	55.1163	60.7757	71.8239	24.5714	19.3901	24.9345	40.5237	86.244	66.0175	2	86593553	86595335	methionyl-tRNA synthetase 2, mitochondrial
BOLL	2.81158	1	1	10.0227	5.72159	19.2799	9.58206	1	3.52279	25.6065	4.42197	2	86630981	86693715	bol, boule-like (Drosophila)
PLCL1	37.2316	1	1	1	1	1.9621	1	1	1	1	1	2	86718340	87086748	phospholipase C-like 1
SATB2	4.62316	12.0458	13.0258	2.12784	14.2204	8.6968	21.8421	18.4069	6.88652	22.9701	24.9538	2	88248732	88455549	SATB homeobox 2
LOC613365	1	1	1	1	1	1	1	1	1	1	1	2	88810053	88850205	formimidoyltransferase-cyclodeaminase-like
C2H2orf69	51.7242	34.1374	56.6195	138.597	114.318	31.7872	139.539	64.1	81.7294	43.1826	58.1958	2	88897205	88908836	chromosome 2 open reading frame, human C2orf69
TYW5	17.3042	6.5229	8.51615	5.51137	2.88864	6.29155	15.7121	18.4069	1	1.8788	1	2	88915907	88935645	tRNA-yW synthesizing protein 5
C2H2orf47	80.7095	176.628	118.252	127.318	99.2091	86.6269	155.477	92.3863	127.981	103.82	92.9044	2	88935958	88947275	chromosome 2 open reading frame, human C2orf47
LOC100848623	1	1	1	1	1	1	1	1	1	1	1	2	88965609	89052415	uncharacterized LOC100848623
LOC531990	1	1	1	1	1	1	1	1	1	1	1	2	89166307	89166718	histone cluster 2, H3c-like
SPATS2L	37.2316	65.0656	68.6453	56.2643	103.931	175.14	111.341	90.2104	62.3879	94.1532	71.8837	2	89336269	89439097	spermatogenesis associated, serine-rich 2-like
KCTD18	13.6811	7.62747	35.5743	1	19.8864	7.25365	7.13004	4.26379	1	23.8489	11.2659	2	89451968	89468680	potassium channel tetramerisation domain containing 18
SGOL2	1423.09	1485.55	1456.13	1304.79	1712.1	1226.71	1157.13	1451.21	1211.1	1509.03	1274.46	2	89494026	89512955	shugoshin-like 2 (S. pombe)
AOX1	557.155	598.577	497.066	569.433	829.167	616.744	503.663	460.107	420.625	294.521	185.787	2	89517810	89588726	aldehyde oxidase 1
BZW1	3122.35	3629.54	3020.99	3457.84	3600.74	3408.76	3329.61	2891.63	2663.39	3197.21	3120.37	2	89887485	89897163	basic leucine zipper and W2 domains 1
CLK1	48.1011	51.8106	17.5355	35.9631	57.6591	20.242	36.5542	121.76	142.276	143.366	152.545	2	89920809	89924764	CDC-like kinase 1
PPIL3	106.072	57.3335	92.697	52.8808	101.098	65.9417	46.3623	101.09	106.116	104.699	54.7739	2	89936568	89945210	peptidylprolyl isomerase (cyclophilin)-like 3
NIF3L1	218.389	205.347	202.433	220.929	166.256	140.023	166.511	230.554	155.731	205.761	243.96	2	89949024	89963314	NIF3 NGG1 interacting factor 3-like 1 (S. pombe)
ORC2	272.737	186.569	130.278	255.893	163.423	154.936	264.592	217.498	134.708	100.305	136.901	2	89969224	89997698	origin recognition complex, subunit 2
FAM126B	153.173	122.504	139.297	97.9945	285.24	181.875	115.019	98.9138	168.345	160.942	145.212	2	90020666	90053933	family with sequence similarity 126, member B
NDUFB3	22.7389	37.4511	16.0323	24.6847	56.7148	13.0262	31.6502	55.3966	14.4549	30.0005	64.0621	2	90084995	90088335	NADH dehydrogenase (ubiquinone) 1 beta subcomplex, 3, 12kDa
CFLAR	1	4.31374	1	1	2.88864	62.5744	14.4861	4.26379	11.0912	1	1	2	90139431	90172951	CASP8 and FADD-like apoptosis regulator
CASP8	2.81158	10.9412	1	5.51137	1	317.531	40.2323	19.4948	27.0689	96.7897	12.2436	2	90290222	90300903	caspase 8, apoptosis-related cysteine peptidase
ALS2CR12	1	1	1	1	1	1	1	1	1	1	1	2	90320268	90333548	amyotrophic lateral sclerosis 2 (juvenile) chromosome region, candidate 12
TRAK2	310.78	211.975	190.407	182.583	149.258	107.793	161.607	79.3311	122.094	97.6685	147.167	2	90355095	90397090	trafficking protein, kinesin binding 2
STRADB	894.108	950.938	940.518	1291.25	1311.71	1108.38	1453.82	1503.43	1426.38	1213.75	2035.61	2	90428835	90455735	STE20-related kinase adaptor beta
ALS2CR11	1	1	1	2.12784	1.94432	1	21.8421	70.6276	1	1	34.242	2	90461665	90585137	amyotrophic lateral sclerosis 2 (juvenile) chromosome region, candidate 11
TMEM237	270.925	176.628	64.1356	194.989	224.803	258.362	330.796	115.233	189.369	83.6076	170.632	2	90589733	90610363	transmembrane protein 237
MPP4	1	1	1	1	1	1	1	1	1	1	1	2	90612742	90638771	membrane protein, palmitoylated 4 (MAGUK p55 subfamily member 4)
ALS2	616.937	1466.78	727.06	634.848	586.477	518.129	589.484	626.561	573.674	542.343	343.686	2	90665186	90712586	amyotrophic lateral sclerosis 2 (juvenile)
CDK15	1	1	1	1	1	1	1	1	1	1	1	2	90753935	90842991	cyclin-dependent kinase 15
FZD7	28.1737	9.83663	17.5355	10.0227	14.2204	9.6589	19.3901	29.2862	9.40931	20.3337	11.2659	2	90987066	90988791	frizzled family receptor 7
LOC614993	4.62316	1	1	3.25569	3.83295	1	1	12.9672	1	1	1	2	91027233	91153084	uncharacterized LOC614993
SUMO1	68.0284	80.5297	83.6776	55.1365	41.6057	64.4986	47.5883	95.65	97.707	88.0016	109.037	2	91156003	91180768	SMT3 suppressor of mif two 3 homolog 1 (S. cerevisiae)
NOP58	1196.64	1031.57	1164.5	723.947	692.241	673.508	1006.33	1427.28	964.707	1104.78	1361.48	2	91203544	91226859	NOP58 ribonucleoprotein homolog (yeast)
BMPR2	193.027	187.674	70.1486	137.469	165.311	115.971	129.731	151.135	100.23	210.155	115.881	2	91370423	91461191	bone morphogenetic protein receptor, type II (serine/threonine kinase)
WDR12	765.486	699.094	617.324	499.507	480.714	411.817	474.239	678.781	641.789	561.677	564.159	2	91622055	91645156	WD repeat domain 12
LOC783376	6.43474	1	1	1	1	1	1	1	1	4.51522	1	2	91686141	91686142	ribosomal protein L7 pseudogene
NBEAL1	1430.34	1555.14	1056.27	966.434	767.786	874.586	1290.76	1280.41	1705.57	974.715	821.785	2	91754397	91886850	neurobeachin-like 1
CYP20A1	87.9558	49.6015	181.388	100.25	168.144	168.405	200.839	235.993	228.051	313.854	80.1942	2	91899134	91943118	cytochrome P450, family 20, subfamily A, polypeptide 1
ABI2	17.3042	30.8236	35.5743	26.9404	26.4966	26.4956	48.8143	69.5397	15.2958	35.2734	1	2	91960677	92057674	abl-interactor 2
CD28	1	1	1	1	1	1	1	1	1	1	1	2	92325179	92358568	CD28 molecule
CTLA4	1	1	1	1	1	1	1	1	1	1	1	2	92490400	92495797	cytotoxic T-lymphocyte-associated protein 4
ICOS	1	1	1	1	1	1	1	1	1	1	1	2	92564266	92587579	inducible T-cell co-stimulator
PARD3B	57.1589	46.2877	28.0581	49.4973	41.6057	108.755	47.5883	80.419	73.3201	95.032	7.35509	2	93222593	94382773	par-3 partitioning defective 3 homolog B (C. elegans)
NRP2	69.84	128.027	104.723	84.4604	12.3318	53.4344	92.9506	125.024	110.321	130.184	171.61	2	94456003	94573687	neuropilin 2
INO80D	462.953	365.511	234.001	360.782	560.036	295.884	243.75	167.454	476.967	631.103	630.154	2	94796433	94837164	INO80 complex subunit D
LOC100847622	1	1	1	2.12784	1	1	1	1	1	1	1	2	94887096	94898178	uncharacterized LOC100847622
NDUFS1	374.185	343.42	264.065	310.029	303.182	159.265	422.747	219.674	413.897	273.429	415.548	2	94894250	94920010	NADH dehydrogenase (ubiquinone) Fe-S protein 1, 75kDa (NADH-coenzyme Q reductase)
EEF1B2	2097	1180.69	1549.33	789.362	894.325	845.242	1497.96	1971.24	2512.86	2961.69	2211.59	2	94923205	94926079	eukaryotic translation elongation factor 1 beta 2
GPR1	68.0284	234.066	112.239	39.3467	8.55455	1	10.8081	140.255	1	1	1.48885	2	94940391	94941459	G protein-coupled receptor 1
ZDBF2	11.8695	129.131	67.1421	90.0996	13.2761	4.36735	12.0341	164.19	30.4326	2.75761	1	2	95040252	95144356	zinc finger, DBF-type containing 2
ADAM23	1	1	1	1	1	1	1	1	1	1	1	2	95145166	95338649	ADAM metallopeptidase domain 23
LOC100139318	1	1	1	1	1	1	1	1	1	1	1	2	95370099	95375107	hCG1657980
DYTN	1	1	1	4.38353	1	1	8.35605	1	1	1	1	2	95378113	95473309	dystrotelin
MDH1B	1	1	1	1	1	6.7726	1	1	1	1	1	2	95475510	95499156	malate dehydrogenase 1B, NAD (soluble)
FASTKD2	26.3621	13.1504	31.0646	42.7302	24.608	22.1662	15.7121	108.705	16.1368	78.3348	4.42197	2	95500429	95519680	FAST kinase domains 2
CPO	1	1	1	1	1	3.40525	1	1	2.68186	1	1	2	95668877	95700725	carboxypeptidase O
KLF7	135.057	128.027	160.342	157.77	152.091	114.047	129.731	247.96	161.618	203.125	218.051	2	95781739	95903170	Kruppel-like factor 7 (ubiquitous)
MIR2355	1	1	1	1	1	1	1	1	1	1	1	2	95834628	95834629	microRNA mir-2355
LOC100847666	1	1	1	1	1	1	1	1	1	1	1	2	96105768	96105769	uncharacterized LOC100847666
CREB1	214.766	155.641	349.749	357.398	306.959	434.426	284.208	475.338	408.851	546.737	372.529	2	96296418	96328670	cAMP responsive element binding protein 1
METTL21A	20.9274	19.7778	29.5614	21.3012	16.1091	36.5977	15.7121	5.35173	21.1823	10.6669	1.48885	2	96341802	96349505	methyltransferase like 21A
LOC784637	1	3.20916	1	1	1	1	2.22601	3.17586	1	7.15163	1.48885	2	96350908	96355055	bicaudal D homolog 1 (Drosophila) pseudogene
CCNYL1	495.561	472.655	357.265	405.896	329.623	495.519	227.811	686.397	405.488	379.765	365.196	2	96424300	96458767	cyclin Y-like 1
FZD5	28.1737	20.8824	13.0258	8.8949	11.3875	9.17785	14.4861	26.0224	8.56838	29.1217	25.9315	2	96470386	96472144	frizzled family receptor 5
PLEKHM3	26.3621	30.8236	16.0323	11.1506	25.5523	10.621	12.0341	20.5828	7.72745	4.51522	34.242	2	96532556	96719858	pleckstrin homology domain containing, family M, member 3
CRYGA	1	1	1	1	1	1	1	1	1	1	1	2	96813275	96816124	crystallin, gamma A
CRYGD	1	1	1	1	1	1	1	4.26379	1	1	1	2	96826434	96828203	crystallin, gamma D
CRYGC	1	1	1	1	1	1	1	1	1	1	1	2	96836674	96838585	crystallin, gamma C
CRYGB	1	1	1	1	1	1	1	1	1	1	1	2	96848354	96850477	crystallin, gamma B
C2H2orf80	13.6811	3.20916	1	3.25569	1	1.48105	10.8081	1	1.84093	1	1.48885	2	96867973	96890808	chromosome 2 open reading frame, human C2orf80
IDH1	6941.16	5205.78	3795.15	4841.7	5586.64	4377.11	6139.62	3897.97	4073.63	4210.47	4117.63	2	96941900	96958425	isocitrate dehydrogenase 1 (NADP+), soluble
PIKFYVE	977.441	1033.78	600.789	614.547	568.535	651.86	648.332	680.957	795.68	595.95	558.782	2	96982647	97056673	phosphoinositide kinase, FYVE finger containing
PTH2R	1	1	1	1	1	1	1	1	1	1	1	2	97098842	97182875	parathyroid hormone 2 receptor
LOC100300864	1	1	1	1	1	1	1	1	1	1	1	2	97475542	97476739	uncharacterized LOC100300864
LOC616092	1	1	1	1	1	1	1	1	1	1	1	2	97501583	97503908	gamma-crystallin F-like
MAP2	1	7.62747	1	4.38353	18.942	2.44315	2.22601	12.9672	1	16.8185	1.48885	2	97915671	97988140	microtubule-associated protein 2
UNC80	8.24632	1	1	5.51137	1	13.5073	2.22601	1	1	1	1	2	98024632	98250937	unc-80 homolog (C. elegans)
RPE	198.462	211.975	214.459	209.651	327.734	216.991	144.443	153.31	251.597	202.246	208.763	2	98260971	98269169	ribulose-5-phosphate-3-epimerase
ACADL	1	1	5.50969	5.51137	1	9.17785	3.45202	1	1	1	1	2	98417197	98456858	acyl-CoA dehydrogenase, long chain
MYL1	1	1	1	1	1	1	1	1	1	1	1	2	98528725	98555115	myosin, light chain 1, alkali; skeletal, fast
LANCL1	548.097	578.695	778.17	661.916	589.31	275.679	503.663	506.888	323.917	301.551	383.283	2	98620429	98666257	LanC lantibiotic synthetase component C-like 1 (bacterial)
CPS1	1	1	1	1	1	1	1	1	1	1	1	2	98758156	98897483	carbamoyl-phosphate synthase 1, mitochondrial
ERBB4	1	1	1	1	9.49886	1	1	1	1	1	1	2	99660619	100632794	v-erb-b2 avian erythroblastic leukemia viral oncogene homolog 4
IKZF2	19.1158	10.9412	7.01292	13.4063	13.2761	20.242	30.4242	11.8793	39.6828	1	9.79936	2	101527601	101704028	IKAROS family zinc finger 2 (Helios)
SPAG16	1	2.10458	1	1	1	1	1	1	1	4.51522	1	2	101854430	102923306	sperm associated antigen 16
VWC2L	1	1	1	1	1	1	1	1	1	1	1	2	102927401	103134122	von Willebrand factor C domain containing protein 2-like
BARD1	2187.58	1054.77	845.815	2450.68	1243.72	1172.36	2313.25	848.499	1662.68	1468.6	1166.43	2	103278837	103370909	BRCA1 associated RING domain 1
ABCA12	2.81158	1	1	1	1	3.8863	2.22601	1	5.20465	1	1	2	103520263	103720887	ATP-binding cassette, sub-family A (ABC1), member 12
ATIC	2776.34	3016.5	3575.68	2802.56	3021.87	2017.56	4098.32	3649.92	3228.49	4364.26	5937.63	2	103847266	103870579	5-aminoimidazole-4-carboxamide ribonucleotide formyltransferase/IMP cyclohydrolase
FN1	172029	252630	185826	259820	217058	136931	152141	233794	232695	257140	294981	2	103882095	103950365	fibronectin 1
MREG	1	2.10458	4.00646	1	1	1	3.45202	3.17586	1.84093	1	1	2	104492958	104560643	melanoregulin
PECR	57.1589	69.4839	83.6776	42.7302	68.9909	16.8746	123.601	106.529	92.6615	81.85	62.5955	2	104590477	104638006	peroxisomal trans-2-enoyl-CoA reductase
TMEM169	8.24632	14.2549	23.5484	29.1961	33.1068	12.0641	12.0341	46.6931	16.9777	42.3038	11.7548	2	104647134	104649749	transmembrane protein 169
SHOX	1	1	1	1	1	1	1	1	1	1	1	2	104975963	104987392	short stature homeobox
SMARCAL1	319.838	516.838	370.794	376.572	342.843	321.86	363.898	202.267	364.282	287.49	346.13	2	105138333	105188478	SWI/SNF related, matrix associated, actin dependent regulator of chromatin, subfamily a-like 1
RPL37A	298.099	200.929	423.408	249.125	374.95	320.417	247.428	435.085	495.467	433.372	689.794	2	105202306	105204546	ribosomal protein L37a
IGFBP2	19.1158	56.229	53.613	56.2643	52.9375	39.0029	32.8762	92.3863	42.2056	80.0924	84.1051	2	105338357	105367086	insulin-like growth factor binding protein 2, 36kDa
IGFBP5	11.8695	1	14.5291	47.2416	1.94432	13.5073	7.13004	37.9897	6.04559	20.3337	3.44427	2	105379126	105397616	insulin-like growth factor binding protein 5
TNP1	1	1	1	11.1506	1	1.48105	1	8.61552	1.84093	1	4.42197	2	105576769	105577157	transition protein 1 (during histone to protamine replacement)
TNS1	834.326	1337.54	1383.97	1100.65	1147.4	773.085	823.651	835.444	735.974	1112.69	1003.15	2	106628658	106723211	tensin 1
MIR2356	1	1	1	1	1	1	1	1	1	1	1	2	106733810	106733811	microRNA mir-2356
RUFY4	1	1	1	1	1	1	1	1	1	1	1	2	106879383	106897237	RUN and FYVE domain containing 4
CXCR2	4.62316	1	1	10.0227	1	11.5831	1	1	1	1	1	2	106906852	106914272	interleukin 8 receptor, beta
ARPC2	7913.98	8466.49	9348.08	7232.73	8904.03	7147.48	8340.31	4922.8	8480.95	7649.23	7963.93	2	106978780	107005717	actin related protein 2/3 complex, subunit 2, 34kDa
GPBAR1	1	4.31374	1	2.12784	1	2.44315	1	2.08793	1	1.8788	1	2	107013858	107014848	G protein-coupled bile acid receptor 1
AAMP	819.834	553.29	880.389	1188.62	1116.24	1218.06	1063.95	651.583	608.152	949.23	907.334	2	107015772	107020211	angio-associated, migratory cell protein
PNKD	42.6663	41.8694	58.1227	21.3012	46.3273	86.6269	24.2941	15.1431	15.2958	146.003	143.745	2	107020667	107022963	paroxysmal nonkinesigenic dyskinesia
TMBIM1	1308.96	1441.37	1380.96	1242.76	1086.97	517.166	503.663	2263.9	858.75	461.493	1144.43	2	107025041	107032403	transmembrane BAX inhibitor motif containing 1
C2H2orf62	1	1	1	1	1	1	1	1	1	1	1	2	107100175	107106008	chromosome 2 open reading frame, human C2orf62
SLC11A1	1	1	1	1	1.94432	1	1	1	1	1	1	2	107115001	107125319	solute carrier family 11 (proton-coupled divalent metal ion transporters), member 1
CTDSP1	144.115	119.19	134.787	37.091	159.645	53.4344	121.149	26.0224	117.889	172.367	70.906	2	107130755	107135069	CTD (carboxy-terminal domain, RNA polymerase II, polypeptide A) small phosphatase 1
MIR26B	1	1	1	1	1	1	1	1	1	1	1	2	107133477	107133478	microRNA mir-26b
VIL1	1	1	1	1	1	1	1	1	1	1.8788	1	2	107150403	107169099	villin 1
USP37	86.1442	103.726	85.1809	123.935	83.1557	92.8805	48.8143	109.793	84.2522	64.2739	89.4825	2	107174481	107245866	ubiquitin specific peptidase 37
RQCD1	747.371	679.212	641.376	566.049	828.223	540.738	658.14	615.681	624.971	593.314	737.213	2	107256128	107287055	RCD1 required for cell differentiation1 homolog (S. pombe)
PLCD4	1	6.5229	1	1	1	1	1	7.52759	1	1	1	2	107302434	107320726	phospholipase C, delta 4
ZNF142	160.419	216.393	154.329	236.719	307.903	195.825	192.257	79.3311	111.162	149.518	161.344	2	107322485	107338147	zinc finger protein 142
BCS1L	557.155	575.381	579.743	647.254	607.252	423.362	712.085	490.569	607.311	450.948	904.89	2	107343386	107345774	BCS1-like (S. cerevisiae)
RNF25	874.181	1053.66	883.396	1441.26	1745.16	2733.84	1528.61	1344.6	1682.86	1216.39	2533.26	2	107346357	107355120	ring finger protein 25
STK36	102.448	240.694	151.323	152.131	97.3205	64.0175	127.279	71.7155	97.707	98.5473	100.237	2	107356023	107381866	serine/threonine kinase 36
TTLL4	1080.7	1410.44	761.634	1138.99	1154.96	1044.4	1023.49	839.795	807.453	657.467	1012.44	2	107412037	107428486	tubulin tyrosine ligase-like family, member 4
CYP27A1	1	2.10458	8.51615	1	1	1	1	17.319	1	1	1	2	107462702	107504783	cytochrome P450, family 27, subfamily A, polypeptide 1
PRKAG3	1	1	1	1	1	1	1	1	1	1	1	2	107511019	107516971	protein kinase, AMP-activated, gamma 3 non-catalytic subunit
WNT6	1	1	2.50323	1	2.88864	3.40525	1	1	1	1	1	2	107544756	107556681	wingless-type MMTV integration site family, member 6
WNT10A	1	1	1	1	1	2.44315	1	1	1	1	1	2	107564364	107573458	wingless-type MMTV integration site family, member 10A
CDK5R2	211.143	131.34	109.233	316.796	484.491	600.869	343.056	162.014	360.077	328.794	286.979	2	107620704	107621826	cyclin-dependent kinase 5, regulatory subunit 2 (p39)
FEV	1	1	1	1	1	1	1	1	1	1	1	2	107646741	107650448	FEV (ETS oncogene family)
CRYBA2	1	1	1	1	1	1	1	1	1	1	1	2	107655382	107658351	crystallin, beta A2
MIR375	1	1	1	1	1	1	1	1	1	1	1	2	107667583	107667584	microRNA mir-375
IHH	1	9.83663	13.0258	3.25569	1.94432	1.48105	12.0341	2.08793	1	1.8788	52.8184	2	107723436	107728824	Indian hedgehog
NHEJ1	127.811	156.746	143.807	79.949	117.151	118.857	160.381	92.3863	199.46	106.457	207.296	2	107743338	107831485	nonhomologous end-joining factor 1
SLC23A3	2.81158	1	14.5291	1	2.88864	3.8863	1	1	22.0233	11.5457	1	2	107836368	107842357	solute carrier family 23 (nucleobase transporters), member 3
CNPPD1	111.506	102.621	106.226	84.4604	48.2159	69.7901	181.223	122.848	63.2289	75.6984	89.4825	2	107844980	107848616	cyclin Pas1/PHO80 domain containing 1
FAM134A	750.994	512.42	964.57	684.473	613.862	626.846	811.391	739.706	1053	1112.69	819.829	2	107850114	107854436	family with sequence similarity 134, member A
ZFAND2B	53.5358	26.4053	56.6195	100.25	162.478	118.376	129.731	44.5173	122.935	120.517	103.17	2	107881373	107883705	zinc finger, AN1-type domain 2B
ABCB6	381.432	1029.36	766.144	408.151	462.772	424.324	444.815	688.573	395.397	355.158	359.818	2	107884337	107891634	ATP-binding cassette, sub-family B (MDR/TAP), member 6
ATG9A	125.999	89.3663	73.155	107.017	158.701	111.16	105.211	139.167	96.0252	191.701	144.723	2	107893449	107900139	ATG9 autophagy related 9 homolog A (S. cerevisiae)
ANKZF1	468.387	357.779	393.343	402.512	563.814	622.516	509.793	277.335	476.126	492.252	488.387	2	107902425	107908285	ankyrin repeat and zinc finger domain containing 1
GLB1L	48.1011	20.8824	16.0323	10.0227	13.2761	18.3178	8.35605	19.4948	7.72745	5.39402	23.4872	2	107908608	107915086	galactosidase, beta 1-like
STK16	196.651	124.713	185.897	127.318	219.138	118.857	182.449	180.509	295.326	109.972	176.987	2	107917414	107919938	serine/threonine kinase 16
TUBA4A	6.43474	6.5229	4.00646	12.2784	3.83295	21.6851	4.67802	24.9345	6.04559	12.4245	20.0653	2	107921784	107925459	tubulin, alpha 4a
TUBA1D	1	4.31374	1	3.25569	1	9.6589	1	1	1	1	1	2	107936610	107942474	tubulin, alpha 3d
DNAJB2	8.24632	15.3595	7.01292	2.12784	11.3875	13.5073	23.0681	7.52759	11.9321	17.6973	26.9092	2	107950116	107956085	DnaJ (Hsp40) homolog, subfamily B, member 2
PTPRN	13.6811	10.9412	2.50323	19.0455	2.88864	80.3732	2.22601	28.1983	8.56838	1	1.48885	2	107959470	107978200	protein tyrosine phosphatase, receptor type, N
MIR153-1	1	1	1	1	1	1	1	1	1	1	1	2	107963110	107963111	microRNA mir-153-1
LOC783612	1	1	1	1	1	1	1	1	1	1	1	2	107982413	107982414	glyceraldehyde-3-phosphate dehydrogenase pseudogene
RESP18	1	1	1	1	1	4.8484	2.22601	1	1	1	1	2	107992995	107998376	regulated endocrine-specific protein 18 homolog (rat)
DNPEP	212.955	216.393	445.956	451.009	328.678	466.175	560.06	770.168	392.033	531.798	494.253	2	108030045	108042198	aspartyl aminopeptidase
DES	1	2.10458	5.50969	7.76706	5.72159	17.8367	1	15.1431	2.68186	10.6669	1	2	108075524	108081776	desmin
SPEG	2.81158	2.10458	1	2.12784	1	1.48105	3.45202	1	1	1.8788	1	2	108089327	108147314	SPEG complex locus
LOC513894	1	1	1	1	1	1	1	1	1	1	1	2	108150667	108152677	hCG2042389-like
GMPPA	100.637	104.83	65.6389	77.6933	92.5989	153.012	143.217	128.288	68.2745	53.7283	92.4156	2	108154357	108160221	GDP-mannose pyrophosphorylase A
CHPF	6.43474	34.1374	20.542	2.12784	11.3875	4.8484	4.67802	14.0552	11.0912	7.15163	15.6656	2	108192369	108197063	chondroitin polymerizing factor
TMEM198	2.81158	1	1	1	1	5.32945	1	1	1	1	1	2	108198257	108202863	transmembrane protein 198
OBSL1	6.43474	16.4641	37.0775	15.662	4.77727	55.8397	35.3282	19.4948	2.68186	6.27283	2.46656	2	108204089	108225840	obscurin-like 1
INHA	1	2.10458	1	1	1	1	2.22601	1	1	1	1	2	108226872	108229791	inhibin, alpha
STK11IP	71.6516	119.19	187.4	129.574	95.4318	56.8018	80.6905	175.069	35.4782	74.8196	70.4172	2	108243940	108260509	serine/threonine kinase 11 interacting protein
SLC4A3	24.5505	26.4053	16.0323	30.3239	9.49886	28.9009	2.22601	30.3742	3.52279	5.39402	10.2882	2	108273127	108286637	solute carrier family 4, anion exchanger, member 3
EPHA4	20.9274	17.5687	19.0388	6.63922	1.94432	3.40525	4.67802	35.8138	22.0233	1	8.3328	2	110354476	110405334	EPH receptor A4
PAX3	1	2.10458	1	22.429	4.77727	18.7988	1	1	1	1	1	2	111129285	111229359	paired box 3
FARSB	707.516	711.244	635.363	719.436	757.399	595.097	815.069	822.388	628.334	692.619	925.91	2	111504584	111578389	phenylalanyl-tRNA synthetase, beta subunit pseudogene
GK	222.013	114.772	182.891	215.29	305.07	208.814	205.743	130.464	212.915	287.49	306.044	2	111598721	111600383	glycerol kinase
MOGAT1	13.6811	12.0458	7.01292	29.1961	1	6.7726	12.0341	15.1431	6.88652	3.63641	4.91083	2	111602254	111631454	monoacylglycerol O-acyltransferase 1
LOC508628	82.5211	12.0458	79.1679	73.182	19.8864	49.105	88.0466	74.9793	47.2512	103.82	123.702	2	111820333	111821083	ribosomal protein S6 pseudogene
ACSL3	7042.61	4885.45	5370.54	5538.71	4556.39	4865.38	5624.7	5581	5256.82	6566.55	5727.43	2	111856337	111887224	acyl-CoA synthetase long-chain family member 3
KCNE4	1	1	1	1	1	1	1	1	1	1	1	2	111988465	111988972	potassium voltage-gated channel, Isk-related family, member 4
SCG2	1	1	2.50323	1	1	1	1	1	1	27.3641	1	2	112550301	112552143	secretogranin II
AP1S3	64.4053	44.0786	53.613	65.287	80.3227	39.484	61.0744	42.3414	38.001	95.032	58.6847	2	112682249	112747074	adaptor-related protein complex 1, sigma 3 subunit
WDFY1	600.633	616.251	581.247	683.345	455.217	542.181	740.283	514.504	531.627	523.888	528.473	2	112793657	112845242	WD repeat and FYVE domain containing 1
MRPL44	151.361	78.3205	122.762	65.287	66.158	127.516	79.4645	103.266	120.412	140.73	171.61	2	112851036	112858593	mitochondrial ribosomal protein L44
SERPINE2	87.9558	115.876	122.762	139.725	123.761	159.265	84.3685	125.024	121.253	129.305	117.347	2	112870533	112900274	serpin peptidase inhibitor, clade E (nexin, plasminogen activator inhibitor type 1), member 2
FAM124B	1	1	1	1	1	1	1	1	1	1	1.97771	2	113276729	113287429	family with sequence similarity 124B
CUL3	2937.57	3083.88	2735.37	2450.68	1918.91	2617.91	1908.67	2695.81	2606.2	3032	2311.81	2	113372691	113486955	cullin 3
DOCK10	17.3042	27.5099	8.51615	78.8212	7.61023	87.589	13.2601	1	58.1833	59.8799	44.0191	2	113650510	113891165	dedicator of cytokinesis 10
NYAP2	1	1	1	1	1	1	1	1	1	1	1	2	114335912	114595813	neuronal tyrosine-phosphorylated phosphoinositide-3-kinase adaptor 2
IRS1	60.7821	52.9152	95.7035	49.4973	48.2159	130.402	69.6565	65.188	7.72745	21.2125	72.3726	2	115790539	115794253	insulin receptor substrate 1
RHBDD1	2.81158	12.0458	5.50969	30.3239	36.8841	3.40525	3.45202	1	10.2502	8.90924	1	2	115854631	115904975	rhomboid domain containing 1
COL4A4	1	1	1	1	5.72159	2.44315	1	1	1	1.8788	1	2	115971117	116104626	collagen, type IV, alpha 4
COL4A3	1	1	1	1	1	1	1	1	1	1	1	2	116130999	116291205	collagen, type IV, alpha 3 (Goodpasture antigen)
MFF	265.491	310.282	212.955	199.5	137.926	90.9563	166.511	101.09	84.2522	194.337	150.1	2	116305043	116327952	mitochondrial fission factor
TM4SF20	8.24632	1	1	2.12784	8.55455	1	4.67802	1	1	1	1	2	116332709	116343377	transmembrane 4 L six family member 20
AGFG1	2196.63	2088.65	1806.38	1689.38	1886.8	1861.22	2186.97	1366.35	2531.36	1892.19	2805.06	2	116442218	116515911	ArfGAP with FG repeats 1
SLC19A3	587.952	562.126	829.279	243.486	520.375	370.446	395.775	553.669	523.218	900.017	740.146	2	116621001	116629606	solute carrier family 19, member 3
LOC100296060	1	1	1	1	1	1	1	1	1	1	1	2	116691755	116692085	uncharacterized LOC100296060
CCL20	1	1	1	1	1	1	1	1	1	2.75761	1	2	116759445	116762448	chemokine (C-C motif) ligand 20
SPHKAP	1	1	1	12.2784	1	5.8105	1	1	1	1	1	2	116898518	117086285	SPHK1 interactor, AKAP domain containing
PID1	13.6811	4.31374	1	7.76706	36.8841	3.8863	23.0681	1	23.7051	1	1	2	117838066	117979858	phosphotyrosine interaction domain containing 1
DNER	1	1	1	1	1	2.9242	1	1	1	1	1	2	118194298	118581736	delta and Notch-like epidermal growth factor-related receptor-like
LOC100138326	381.432	168.896	140.8	334.842	506.21	385.359	243.75	299.093	367.646	530.04	264.492	2	118596277	118596511	CD24 antigen
TRIP12	5260.01	5414.54	3715.48	5387.58	7287.36	5857.78	5157.59	3999.15	7020.25	9318.08	7787.94	2	118622560	118729375	thyroid hormone receptor interactor 12
FBXO36	1	5.41832	13.0258	3.25569	1.94432	1	1	1	1	11.5457	1	2	118773137	118872523	F-box protein 36
SLC16A14	1	2.10458	2.50323	29.1961	1	1	1	1	1	1	1	2	118886690	118909613	solute carrier family 16, member 14 (monocarboxylic acid transporter 14)
SP140	1	1	7.01292	13.4063	2.88864	3.8863	3.45202	1	9.40931	3.63641	2.46656	2	118927757	118961993	SP140 nuclear body protein
SP110	1	1	1	1	4.77727	1	1	1	1	1	1.48885	2	119055561	119058335	SP110 nuclear body protein
SP100	1	1	1	1	1	1	1	1	1	1	1	2	119135909	119159089	SP100 nuclear antigen
SP140L	27455.5	20958.2	12790.5	23064.3	12070.3	14529.7	11051	24010.6	20204.4	27364.3	15075.3	2	119171822	119202393	SP140 nuclear body protein-like
CAB39	256.433	325.746	271.581	245.742	272.964	277.604	260.914	290.39	237.302	370.098	263.025	2	119386099	119440642	calcium binding protein 39
ITM2C	58.9705	67.2747	80.6712	99.1223	42.55	118.376	48.8143	95.65	80.0475	53.7283	49.3965	2	119476551	119489191	integral membrane protein 2C
GPR55	1	1	1	1	1	1	1	1	1	1	1	2	119524656	119525703	G protein-coupled receptor 55
SPATA3	1	1	1	1	1	1	1	1	1	1	1	2	119614090	119621931	spermatogenesis associated 3
C2H2orf72	26.3621	26.4053	7.01292	17.9176	1.94432	16.3936	14.4861	1	1	1	1	2	119657359	119664584	chromosome 2 open reading frame, human C2orf72
PSMD1	1808.96	1260.22	1208.09	1375.84	2576.16	1929.05	2815.91	1140.06	1371.72	1562.64	1039.81	2	119675809	119754914	proteasome (prosome, macropain) 26S subunit, non-ATPase, 1
HTR2B	26.3621	30.8236	11.5226	68.6706	15.1648	39.0029	8.35605	15.1431	26.2279	53.7283	52.8184	2	119704775	119718530	5-hydroxytryptamine (serotonin) receptor 2B
ARMC9	62.5937	54.0198	64.1356	33.7075	73.7125	43.3324	107.663	114.145	34.6372	37.9098	56.2404	2	119779532	119932085	armadillo repeat containing 9
B3GNT7	31.7968	16.4641	17.5355	5.51137	12.3318	5.8105	14.4861	3.17586	23.7051	7.15163	13.2213	2	119987530	119990869	UDP-GlcNAc:betaGal beta-1,3-N-acetylglucosaminyltransferase 7
NCL	16410.3	15258.6	14529.7	14247.9	11571.7	11645.8	14822.2	12213	12866.4	15530.3	16199.6	2	120039843	120049214	nucleolin
LOC100848851	1	1	1	1	1	1	1	1	1	1	1	2	120081513	120086476	uncharacterized LOC100848851
NMUR1	1	1	1	1	8.55455	1	1	1	1	1	2.46656	2	120086562	120118095	neuromedin U receptor 1
PDE6D	71.6516	139.072	100.213	119.424	102.042	119.819	161.607	31.4621	128.821	109.972	63.0844	2	120251016	120305713	phosphodiesterase 6D, cGMP-specific, rod, delta
LOC615610	1	1	1	1	1.94432	1.48105	1	1	3.52279	1	1.48885	2	120279662	120279663	phosphoglycerate mutase 1 (brain) pseudogene
COPS7B	42.6663	56.229	37.0775	61.9035	84.1	43.3324	51.2663	46.6931	31.2735	48.4554	27.3981	2	120312966	120332911	COP9 constitutive photomorphogenic homolog subunit 7B (Arabidopsis)
NPPC	1	1	1	1	1	1.48105	1	1	1	1	1.48885	2	120396321	120397124	natriuretic peptide C
DIS3L2	120.564	115.876	218.968	30.3239	133.205	67.3849	102.759	119.585	193.573	172.367	196.052	2	120487546	120794200	DIS3 mitotic control homolog (S. cerevisiae)-like 2
LOC516378	15062.5	17879.7	8241.71	9906.85	14743.7	12913.3	35323.5	4818.36	13336.5	15646.4	22697	2	120845480	120848463	intestinal alkaline phosphatase VII
ALPI	1	1	1	1	11.3875	4.8484	1	2.08793	4.36372	19.4549	2.46656	2	120857864	120907512	alkaline phosphatase, intestinal
LOC528262	11218.3	11627.8	6540.05	10856.5	11313	15854	20559.9	5750.72	17031.5	11869.3	13894.2	2	120869239	120872153	intestinal-type alkaline phosphatase-like
LOC100125266	1	1	1	1	1	21.6851	2.22601	1	1	1.8788	3.93312	2	120910121	120913041	alkaline phosphatase-like
CHRND	1	1	1	1	1	1	1	1	1.84093	1	1	2	120975091	120982066	cholinergic receptor, nicotinic, delta
CHRNG	1	1	1	1	1	1	1	1	1	1	1	2	120988479	120993836	cholinergic receptor, nicotinic, gamma (muscle)
EIF4E2	1258.24	863.676	1350.9	1036.36	918.877	740.855	1432.98	895.28	866.318	1254.17	926.888	2	120995694	121019895	eukaryotic translation initiation factor 4E family member 2
LOC100847876	15.4926	14.2549	22.0452	13.4063	15.1648	12.5452	12.0341	44.5173	31.2735	54.6071	11.7548	2	121089839	121145133	unconventional myosin-IXa-like
PHC2	73.4632	59.5427	97.2067	87.8439	68.9909	44.7755	39.0063	73.8914	32.1144	32.6369	54.7739	2	121176034	121223871	polyhomeotic homolog 2 (Drosophila)
ZNF362	1	20.8824	44.5937	20.1733	12.3318	18.7988	8.35605	4.26379	6.88652	9.78804	8.82165	2	121244069	121268659	zinc finger protein 362
TRIM62	15.4926	6.5229	2.50323	10.0227	4.77727	10.621	19.3901	4.26379	5.20465	20.3337	1.97771	2	121347860	121383138	tripartite motif containing 62
ADC	1	1	2.50323	1	1	1.9621	1	1	1	1	1	2	121400543	121443507	arginine decarboxylase
AK2	2435.76	2512.81	3520.06	2557.82	2595.04	1949.25	2855.15	4095.97	2685.25	3724.49	3072.47	2	121486334	121509033	adenylate kinase 2
MIR2357	1	1	1	1	1	1	1	1	1	1	1	2	121519016	121519017	microRNA mir-2357
RNF19B	415.852	202.033	376.807	384.467	272.019	410.854	394.549	764.728	316.349	361.31	151.567	2	121552617	121575784	ring finger protein 19B
TMEM54	69.84	45.1832	124.265	56.2643	38.7727	105.388	77.0125	71.7155	54.8196	34.3946	19.0876	2	121604242	121610696	transmembrane protein 54
HPCA	2.81158	3.20916	1	8.8949	4.77727	13.5073	2.22601	3.17586	4.36372	1.8788	6.37739	2	121611766	121616743	hippocalcin
FNDC5	2.81158	2.10458	5.50969	1	1	2.9242	2.22601	1	1	1	1	2	121636450	121637647	fibronectin type III domain containing 5
S100PBP	2162.21	1138.72	1146.46	1846.15	1089.8	1156.96	1393.75	1228.19	1867.87	1028.32	1700.25	2	121648600	121673340	S100P binding protein
YARS	223.824	168.896	224.981	179.199	175.699	278.566	427.651	189.212	153.208	229.489	257.648	2	121680078	121711710	tyrosyl-tRNA synthetase
KIAA1522	84.3326	90.4709	77.6647	165.665	123.761	159.265	99.0806	53.2207	78.3656	62.5163	80.6831	2	121714875	121740860	KIAA1522 ortholog
SYNC	6.43474	26.4053	25.0517	38.2188	34.0511	13.5073	30.4242	41.2535	57.3424	3.63641	2.46656	2	121783053	121799645	syncoilin, intermediate filament protein
RBBP4	1459.32	1550.72	1556.84	1558.55	2181.43	1468.68	1600.94	2501.07	2384.2	1985.34	1247.58	2	121801828	121817384	retinoblastoma binding protein 4
ZBTB8OS	10.0579	6.5229	5.50969	2.12784	2.88864	2.9242	1	1	11.0912	4.51522	9.31051	2	121818188	121830049	zinc finger and BTB domain containing 8 opposite strand
ZBTB8A	64.4053	69.4839	59.626	107.017	63.325	79.4111	186.127	26.0224	33.7963	114.366	42.5525	2	121847356	121856118	zinc finger and BTB domain containing 8A
ZBTB8B	48.1011	16.4641	22.0452	11.1506	25.5523	64.0175	36.5542	23.8466	40.5237	47.5766	36.6863	2	121951506	121955225	zinc finger and BTB domain containing 8B
BSDC1	209.332	219.707	124.265	167.921	196.474	166.962	187.353	144.607	155.731	136.336	95.8375	2	122006974	122028445	BSD domain containing 1
TSSK3	8.24632	4.31374	5.50969	8.8949	10.4432	17.3557	25.5202	3.17586	6.88652	1	1.48885	2	122030557	122032078	testis-specific serine kinase 3
LOC614396	1	1	1	1	1	1	1	1	1	1	1	2	122032650	122033273	uncharacterized LOC614396
MARCKSL1	28.1737	28.6145	19.0388	35.9631	25.5523	33.7114	25.5202	14.0552	10.2502	30.0005	19.0876	2	122053748	122055031	MARCKS-like 1
HDAC1	12591.5	6624.06	7992.17	8807.2	6268.44	6574.06	8046.06	9758.66	6972.32	10628.4	12386.6	2	122056514	122087808	histone deacetylase 1
LCK	17.3042	14.2549	14.5291	44.9859	41.6057	92.8805	24.2941	17.319	64.9107	2.75761	17.1322	2	122093340	122101291	lymphocyte-specific protein tyrosine kinase
FAM167B	8.24632	25.3007	1	3.25569	14.2204	12.0641	35.3282	1	12.773	15.0609	1.97771	2	122115912	122117027	family with sequence similarity 167, member B
MTMR9	415.852	469.342	405.369	199.5	307.903	225.169	224.133	299.093	268.416	191.701	236.627	2	122121466	122128336	myotubularin related protein 9
EIF3I	3039.02	4255.84	4276.19	3487.16	4507.29	3036.42	4697.84	4146.02	5321.57	5453.98	8882.49	2	122128740	122136282	eukaryotic translation initiation factor 3, subunit I
TMEM234	1	1	4.00646	1	1	1	3.45202	1	1	1	1	2	122136402	122141094	transmembrane protein 234
DCDC2B	1	1	1	4.38353	1	1	1	1	1	1	1	2	122142110	122146489	doublecortin domain containing 2B
IQCC	15.4926	14.2549	4.00646	12.2784	18.942	5.32945	35.3282	16.231	1	25.6065	24.9538	2	122147283	122148892	IQ motif containing C
CCDC28B	37.2316	15.3595	26.5549	44.9859	45.383	58.726	56.1704	21.6707	48.0921	30.8793	38.1529	2	122151176	122152851	coiled-coil domain containing 28B
TMEM39B	11.8695	25.3007	46.0969	29.1961	30.2739	43.8134	46.3623	108.705	61.547	28.2429	40.5971	2	122194514	122213643	transmembrane protein 39B
KHDRBS1	98.8253	118.085	97.2067	112.656	82.2114	119.819	150.573	48.869	80.0475	73.9407	73.3503	2	122234514	122257388	KH domain containing, RNA binding, signal transduction associated 1
PTP4A2	417.663	511.316	513.601	314.54	325.845	510.913	438.685	686.397	647.676	442.16	631.132	2	122350418	122359294	protein tyrosine phosphatase type IVA, member 2
SPOCD1	1	1	1	1	1	1.9621	3.45202	1	1	1	1	2	122427863	122468429	SPOC domain containing 1
COL16A1	1	1	1	1	7.61023	1	1	1	1	1	1	2	122557457	122611815	collagen, type XVI, alpha 1
PEF1	57.1589	83.8434	59.626	54.0086	123.761	46.2187	110.115	52.1328	76.6838	76.5772	87.527	2	122620944	122637930	penta-EF-hand domain containing 1
HCRTR1	1	1	2.50323	1	1	1	1	1	1.84093	1	1	2	122641986	122649721	hypocretin (orexin) receptor 1
TINAGL1	1	1	10.0194	2.12784	1.94432	1	1	29.2862	1	1.8788	1.48885	2	122686186	122697486	tubulointerstitial nephritis antigen-like 1
LOC100847376	8.24632	2.10458	1	1	1.94432	1	2.22601	1	4.36372	1	1	2	122720506	122722805	uncharacterized LOC100847376
FABP3	703.893	506.897	710.524	578.456	677.132	360.344	320.988	793.014	449.216	656.588	922	2	122723270	122783594	fatty acid binding protein 3, muscle and heart (mammary-derived growth inhibitor)
ZCCHC17	1254.61	885.768	579.743	1193.13	825.39	871.7	1345.93	874.609	1203.53	1431.69	1030.04	2	122785276	122881017	zinc finger, CCHC domain containing 17
SERINC2	51.7242	24.1962	44.5937	24.6847	39.7171	57.7639	21.8421	78.2431	64.0698	29.1217	34.7309	2	122814782	122817292	serine incorporator 2
SNRNP40	145.926	299.236	423.408	140.853	179.476	232.385	263.366	226.202	128.821	155.67	139.345	2	122889901	122915227	small nuclear ribonucleoprotein 40kDa (U5)
NKAIN1	42.6663	93.7846	94.2002	44.9859	52.9375	38.5219	74.5605	111.969	37.16	25.6065	61.129	2	122936270	122979876	Na+/K+ transporting ATPase interacting 1
PUM1	1933.95	1999.18	1938.66	2645.79	2106.83	2316.29	2248.27	2358.55	2449.79	2324.56	2785.51	2	123074849	123194738	pumilio homolog 1 (Drosophila)
SDC3	89.7674	107.04	145.31	44.9859	46.3273	198.711	79.4645	29.2862	64.0698	33.5158	65.5286	2	123221290	123244558	syndecan 3
LAPTM5	1	1	1	2.12784	1	35.6356	1	8.61552	1	1	1	2	123350487	123375236	lysosomal protein transmembrane 5
MATN1	1	1	1	1	1	1	1	1	1	1	1	2	123392062	123401324	matrilin 1, cartilage matrix protein
PTPRU	1	1	1	1	1	21.6851	16.9381	1	1	1	1	2	124820698	124906896	protein tyrosine phosphatase, receptor type, U
MECR	20.9274	20.8824	58.1227	48.3694	32.1625	39.965	97.8546	57.5724	33.7963	23.8489	71.8837	2	124913942	124949961	mitochondrial trans-2-enoyl-CoA reductase
SRSF4	151.361	113.667	127.271	199.5	140.759	164.076	122.375	150.047	143.958	198.731	153.033	2	124956720	124981578	serine/arginine-rich splicing factor 4
EPB41	883.239	1216.04	815.75	718.308	730.014	803.872	909.472	611.33	655.244	794.56	658.019	2	125015669	125108548	erythrocyte membrane protein band 4.1 (elliptocytosis 1, RH-linked)
OPRD1	1	1	1	1	1	1	1	1	1	1	1	2	125213836	125255802	opioid receptor, delta 1
YTHDF2	379.62	569.858	506.085	493.867	473.159	588.362	661.818	511.24	351.668	397.341	441.457	2	125294904	125324001	YTH domain family, member 2
GMEB1	294.476	323.537	348.246	226.569	452.384	370.446	208.195	389.392	513.127	291.884	488.876	2	125343648	125370196	glucocorticoid modulatory element binding protein 1
TAF12	20.9274	17.5687	20.542	44.9859	36.8841	27.9388	26.7462	31.4621	27.0689	15.0609	42.0637	2	125406727	125417997	TAF12 RNA polymerase II, TATA box binding protein (TBP)-associated factor, 20kDa
RAB42	2.81158	1	1	1	1	1	1	1	1	1	1	2	125426085	125427394	RAB42, member RAS oncogene family
SNHG12	15.4926	17.5687	19.0388	19.0455	25.5523	15.4315	18.1641	31.4621	24.5461	13.3033	50.3742	2	125438150	125438151	small nucleolar RNA host gene 12 (non-protein coding)
TRNAU1AP	11.8695	15.3595	19.0388	17.9176	23.6636	42.3703	29.1982	45.6052	13.614	15.9397	52.3296	2	125439519	125462670	tRNA selenocysteine 1 associated protein 1
RCC1	238.317	293.713	342.233	427.325	466.549	400.271	320.988	532.999	274.303	321.764	417.014	2	125468460	125475894	regulator of chromosome condensation 1
SNHG3	127.811	83.8434	381.317	122.807	82.2114	32.7493	153.025	129.376	74.161	98.5473	30.3312	2	125501521	125501522	small nucleolar RNA host gene 3 (non-protein coding)
PHACTR4	1318.02	1202.78	1202.08	1202.15	1103.96	1411.44	1083.57	1913.58	620.766	750.62	866.759	2	125509873	125558428	phosphatase and actin regulator 4
MED18	69.84	42.974	64.1356	101.378	119.984	182.837	119.923	88.0345	191.05	90.638	105.615	2	125653646	125657847	mediator complex subunit 18
SESN2	381.432	411.903	674.447	402.512	474.103	524.863	487.725	360.017	221.324	227.731	310.933	2	125698669	125713811	sestrin 2
ATPIF1	361.504	232.962	381.317	297.623	483.547	411.817	498.759	411.15	570.31	594.193	708.86	2	125728002	125730123	ATPase inhibitory factor 1
DNAJC8	423.098	561.022	459.485	426.197	484.491	309.353	580.902	329.555	492.104	649.558	392.572	2	125733269	125757374	DnaJ (Hsp40) homolog, subfamily C, member 8
LOC613460	1	1	1	1	1	1	1	1	1	1	1	2	125767438	125767439	ribosomal protein S3A pseudogene
PTAFR	1	1	1	1	1	1	1	1	1	1	1	2	125808443	125809472	platelet-activating factor receptor
EYA3	526.358	865.885	600.789	511.913	441.997	659.557	507.341	531.911	788.952	745.347	728.414	2	125899851	125969372	eyes absent homolog 3 (Drosophila)
XKR8	53.5358	103.726	80.6712	70.9263	60.492	30.344	24.2941	12.9672	133.026	141.609	176.009	2	125976707	125982957	XK, Kell blood group complex subunit-related family, member 8
SMPDL3B	1	4.31374	1	6.63922	2.88864	3.40525	15.7121	31.4621	12.773	1	1	2	125983797	126015186	sphingomyelin phosphodiesterase, acid-like 3B
RPA2	66.2168	107.04	143.807	84.4604	124.706	150.125	77.0125	172.893	146.481	77.456	105.126	2	126031111	126054684	replication protein A2, 32kDa
PPP1R8	254.621	323.537	178.381	232.208	427.832	362.749	251.106	145.695	360.918	200.489	329.509	2	126112819	126129757	protein phosphatase 1, regulatory subunit 8
STX12	363.316	380.975	408.375	135.213	223.859	248.26	280.53	422.03	212.915	167.973	98.2818	2	126136094	126170399	syntaxin 12
FAM76A	136.868	110.353	50.6066	44.9859	120.928	39.965	177.545	127.2	22.0233	73.9407	68.9506	2	126189466	126219751	family with sequence similarity 76, member A
IFI6	1	1	1	1	1	1	1	1	1	15.0609	1	2	126248068	126250038	interferon, alpha-inducible protein 6
FGR	256.433	322.433	259.555	281.833	348.509	264.615	311.18	102.178	244.029	100.305	606.2	2	126281910	126291484	Gardner-Rasheed feline sarcoma viral (v-fgr) oncogene homolog
AHDC1	2.81158	31.9282	5.50969	37.091	17.9977	3.8863	9.58206	8.61552	5.20465	10.6669	3.93312	2	126350163	126354957	AT hook, DNA binding motif, containing 1
WASF2	749.182	812.866	624.84	546.876	704.517	835.621	720.667	585.219	881.455	988.776	1110.7	2	126450276	126466928	WAS protein family, member 2
GPR3	1	1	1	1	1	1	1	1	1	1	1	2	126478727	126479720	G protein-coupled receptor 3
CD164L2	1	1	1	2.12784	1	1	1	1	1	1	1	2	126490922	126494817	CD164 sialomucin-like 2
MAP3K6	93.3905	107.04	134.787	55.1365	71.8239	45.2566	48.8143	29.2862	45.5693	56.3647	115.392	2	126506014	126518684	mitogen-activated protein kinase kinase kinase 6
SYTL1	1	1	1	1	1	1	3.45202	1	1	1	1	2	126519149	126526163	synaptotagmin-like 1
TMEM222	39.0432	73.9022	40.084	101.378	81.267	59.207	48.8143	71.7155	65.7517	73.9407	117.347	2	126532484	126535515	transmembrane protein 222
WDTC1	222.013	309.178	288.117	147.62	296.572	187.166	164.059	351.314	264.211	158.306	320.221	2	126553971	126608808	WD and tetratricopeptide repeats 1
SLC9A1	154.984	389.812	277.594	355.143	417.444	394.98	241.298	306.709	282.712	325.279	257.648	2	126676946	126726625	solute carrier family 9 (sodium/hydrogen exchanger), member 1
FAM46B	269.114	160.059	277.594	386.722	245.578	223.245	311.18	136.991	511.445	376.249	286.002	2	126799763	126806190	family with sequence similarity 46, member B
C2H1orf172	6.43474	5.41832	1	4.38353	3.83295	1	2.22601	1	3.52279	1	1.48885	2	126854009	126856856	chromosome 2 open reading frame, human C1orf172
NUDC	693.023	508.002	797.712	496.123	966.093	936.642	725.571	639.616	1296.87	1747.18	2182.75	2	126860583	126873699	nuclear distribution gene C homolog (A. nidulans)
NR0B2	1	1	1	1	1	1	1	1	1	1	1	2	126892709	126894458	nuclear receptor subfamily 0, group B, member 2
GPATCH3	115.129	220.811	253.543	282.961	237.08	276.642	258.462	208.795	302.053	238.277	111.97	2	126904092	126910320	G patch domain containing 3
GPN2	11.8695	19.7778	19.0388	7.76706	15.1648	9.6589	16.9381	6.43966	6.04559	7.15163	3.44427	2	126911254	126919837	GPN-loop GTPase 2
SFN	948.456	1168.54	2004.81	1679.23	412.723	2088.28	1526.15	7605.64	935.274	686.467	1663.1	2	126930069	126930816	stratifin
ZDHHC18	13.6811	16.4641	14.5291	30.3239	61.4364	39.0029	25.5202	36.9017	25.387	27.3641	41.086	2	126936630	126965129	zinc finger, DHHC-type containing 18
PIGV	75.2747	124.713	106.226	90.0996	78.4341	175.621	140.765	31.4621	67.4335	62.5163	139.345	2	126983533	126989594	phosphatidylinositol glycan anchor biosynthesis, class V
ARID1A	2097	2475.26	1493.71	2791.28	2204.09	2242.69	1728.45	2271.51	2317.76	3220.06	3069.53	2	127000105	127087017	AT rich interactive domain 1A (SWI-like)
LOC100847584	1	1	7.01292	1	1	13.0262	1	1	1	1	1	2	127035106	127035107	uncharacterized LOC100847584
RPS6KA1	808.964	832.748	558.698	451.009	1103.96	715.359	594.388	538.438	387.828	700.528	946.931	2	127165478	127202437	ribosomal protein S6 kinase, 90kDa, polypeptide 1
HMGN2	401.359	269.413	259.555	359.654	475.992	296.365	430.103	243.609	270.939	269.035	420.925	2	127252596	127255228	high mobility group nucleosomal binding domain 2
DHDDS	55.3474	71.6931	62.6324	82.2047	109.597	73.1575	90.4986	102.178	72.4791	47.5766	91.4379	2	127266879	127294540	dehydrodolichyl diphosphate synthase
LIN28A	11.8695	20.8824	35.5743	13.4063	36.8841	32.7493	39.0063	60.8362	21.1823	11.5457	17.1322	2	127299733	127310992	lin-28 homolog A (C. elegans)
ZNF683	1	1	1	1	1	1	1	1	1	1	1	2	127356738	127362240	zinc finger protein 683
CD52	1	1	1	3.25569	1	4.36735	1	1	2.68186	1	1	2	127396596	127397911	CD52 molecule
UBXN11	28.1737	33.0328	19.0388	30.3239	5.72159	32.7493	27.9722	9.70345	3.52279	52.8494	13.7102	2	127411421	127428860	UBX domain protein 11
SH3BGRL3	165.854	171.105	163.349	113.784	190.808	153.493	148.121	108.705	164.982	117.881	250.804	2	127429968	127430941	SH3 domain binding glutamic acid-rich protein like 3
CEP85	198.462	196.511	179.884	117.168	131.316	201.598	155.477	26.0224	180.118	128.427	111.481	2	127433773	127463138	centrosomal protein 85kDa
LOC784533	2.81158	8.73205	5.50969	8.8949	1.94432	1	1	2.08793	1	1	1	2	127471497	127482632	uromodulin-like
CATSPER4	1	3.20916	2.50323	3.25569	3.83295	1	1	1	1	1	1	2	127483215	127500248	cation channel, sperm associated 4
LOC783017	1	2.10458	4.00646	3.25569	3.83295	4.8484	2.22601	1	4.36372	1	4.91083	2	127500256	127504288	connector enhancer of kinase suppressor of Ras 1-like
ZNF593	1	2.10458	1	1	1.94432	1	1	1	3.52279	1	1.48885	2	127523860	127524598	zinc finger protein 593
PDIK1L	1	1	1	1	1	1.9621	2.22601	1	1	1	1	2	127561636	127566545	PDLIM1 interacting kinase 1 like
TRIM63	2.81158	3.20916	1	1	3.83295	2.9242	1	1	35.4782	1	22.5096	2	127615184	127630053	tripartite motif containing 63
SLC30A2	243.752	137.968	232.497	25.8126	61.4364	39.0029	42.6843	117.409	259.166	217.186	264.492	2	127638454	127645225	solute carrier family 30 (zinc transporter), member 2
EXTL1	37.2316	18.6733	11.5226	30.3239	1	3.8863	56.1704	2.08793	18.6595	45.819	22.5096	2	127648862	127664949	exostoses (multiple)-like 1
PAFAH2	75.2747	89.3663	91.1938	60.7757	52.9375	69.7901	65.9784	59.7483	88.4568	27.3641	70.4172	2	127691206	127719287	platelet-activating factor acetylhydrolase 2, 40kDa
STMN1	69.84	111.458	100.213	94.611	69.9352	56.3207	72.1085	140.255	22.8642	42.3038	27.8869	2	127775705	127778990	stathmin 1
PAQR7	1	1	1	1	1	1	1	1	1	1	1	2	127817332	127818385	progestin and adipoQ receptor family member VII
SEPN1	42.6663	84.948	59.626	50.6251	59.5477	89.5132	72.1085	29.2862	48.0921	11.5457	101.704	2	127854464	127869417	selenoprotein N, 1
MAN1C1	1	10.9412	4.00646	10.0227	3.83295	46.2187	12.0341	1	12.773	44.9402	23.9761	2	127888871	128008111	mannosidase, alpha, class 1C, member 1
LDLRAP1	1	13.1504	4.00646	4.38353	1.94432	3.40525	3.45202	10.7914	2.68186	1.8788	2.95541	2	128079133	128103219	low density lipoprotein receptor adaptor protein 1
TMEM57	359.693	280.459	179.884	293.111	211.583	201.117	166.511	255.576	253.279	246.186	190.675	2	128138366	128203607	transmembrane protein 57
LOC282685	1	1	1	1	1	1	1	1	1	1	1	2	128213687	128254418	rhesus-like protein
TMEM50A	91.579	81.6343	49.1033	123.935	196.474	102.502	133.409	117.409	213.756	215.428	302.623	2	128256680	128269839	transmembrane protein 50A
LOC615263	24.5505	24.1962	22.0452	33.7075	20.8307	32.7493	30.4242	52.1328	52.2968	36.1522	68.4618	2	128303380	128305322	uncharacterized LOC615263
SYF2	408.605	425.158	286.614	280.705	207.806	213.624	265.818	180.509	208.71	181.155	234.183	2	128316509	128324853	SYF2 homolog, RNA splicing factor (S. cerevisiae)
RUNX3	1	1	1	1	1	1	1	1	1	1	1	2	128629675	128656311	runt-related transcription factor 3
CLIC4	749.182	396.439	578.24	357.398	581.756	470.024	560.06	740.794	586.288	501.918	494.253	2	128710850	128783478	chloride intracellular channel 4
SRRM1	4651.32	4168.58	3631.3	3835.67	3985.08	4004.78	3996.56	3801.15	4583.23	4489.93	4872.91	2	128848934	128877208	serine/arginine repetitive matrix 1
RCAN3	519.112	399.753	187.4	158.898	390.059	213.143	224.133	402.447	354.191	322.642	269.869	2	128986258	129008119	RCAN family member 3
NIPAL3	84.3326	57.3335	103.22	108.145	69.9352	92.3995	68.4304	176.157	99.3889	88.0016	115.881	2	129041412	129091075	NIPA-like domain containing 3
GRHL3	106.072	156.746	486.543	429.58	73.7125	592.691	306.276	906.159	111.162	178.518	150.589	2	129160818	129195856	grainyhead-like 3 (Drosophila)
IL28RA	6.43474	4.31374	11.5226	25.8126	4.77727	35.1545	14.4861	31.4621	5.20465	8.03043	1	2	129315263	129338069	interleukin 28 receptor, alpha (interferon, lambda receptor)
IL22RA1	1	1	1	5.51137	1	1	1	1	1	1	1	2	129351721	129377155	interleukin 22 receptor, alpha 1
MYOM3	2.81158	5.41832	1	21.3012	14.2204	23.1283	1	15.1431	4.36372	2.75761	6.37739	2	129388769	129437536	myomesin 3
SFRS13A	2216.56	1647.93	2070.95	2226.23	843.332	1392.68	1957.71	1803.7	925.183	1586.36	1368.32	2	129522760	129533490	splicing factor, arginine/serine-rich 13A
PNRC2	568.024	297.027	500.072	332.586	455.217	374.295	281.756	410.062	259.166	249.702	299.201	2	129538557	129538977	proline-rich nuclear receptor coactivator 2
CNR2	98.8253	62.8564	95.7035	139.725	25.5523	101.058	30.4242	64.1	33.7963	33.5158	45.4856	2	129632011	129633097	cannabinoid receptor 2 (macrophage)
FUCA1	222.013	166.687	121.258	394.617	102.986	239.601	123.601	292.566	191.891	209.277	155.478	2	129652519	129674930	fucosidase, alpha-L- 1, tissue
HMGCL	22.7389	30.8236	65.6389	47.2416	38.7727	50.0671	40.2323	34.7259	55.6605	63.3951	35.7086	2	129687567	129705107	3-hydroxymethyl-3-methylglutaryl-CoA lyase
GALE	149.549	124.713	170.865	156.642	72.7682	219.397	155.477	192.476	173.391	31.7582	72.8614	2	129709100	129711540	UDP-galactose-4-epimerase
LYPLA2	37.2316	23.0916	40.084	31.4518	25.5523	49.105	27.9722	22.7586	27.9098	19.4549	43.0414	2	129712744	129713577	lysophospholipase II
PITHD1	629.618	419.635	476.021	584.095	522.264	504.659	600.518	284.95	469.399	271.672	217.562	2	129716266	129723078	PITH (C-terminal proteasome-interacting domain of thioredoxin-like) domain containing 1
LOC100849054	78.8979	99.3075	166.355	126.191	152.091	196.787	123.601	163.102	128.821	114.366	129.568	2	129726285	129728915	uncharacterized LOC100849054
TCEB3	1571.64	2046.68	1069.8	2031.12	1629.95	2461.09	1766.45	1269.53	1716.5	2116.28	1763.32	2	129744271	129752811	transcription elongation factor B (SIII), polypeptide 3 (110kDa, elongin A)
RPL11	131.434	137.968	214.459	155.514	141.703	162.152	176.319	325.204	242.347	259.368	140.323	2	129791419	129795545	ribosomal protein L11
ID3	1	1	1	1	1	1	1	1	1	1	1	2	129895459	129895939	inhibitor of DNA binding 3, dominant negative helix-loop-helix protein
E2F2	1	1	1	1	1	2.44315	1	20.5828	1	1	6.37739	2	129925793	129942090	E2F transcription factor 2
ASAP3	8.24632	1	4.00646	1	3.83295	1	12.0341	5.35173	10.2502	1.8788	1	2	129969306	130013624	ArfGAP with SH3 domain, ankyrin repeat and PH domain 3
TCEA3	1	25.3007	46.0969	19.0455	1	18.3178	10.8081	1	7.72745	1	1	2	130023610	130069511	transcription elongation factor A (SII), 3
ZNF436	8.24632	6.5229	5.50969	8.8949	14.2204	9.17785	7.13004	10.7914	6.88652	1.8788	8.82165	2	130079645	130084459	zinc finger protein 436
HNRNPR	260.056	203.138	250.536	269.427	243.69	155.417	191.031	144.607	148.163	219.822	182.853	2	130103591	130131982	heterogeneous nuclear ribonucleoprotein R
HTR1D	1	1	10.0194	1	1	1	1	1	1	1	1	2	130245901	130247035	5-hydroxytryptamine (serotonin) receptor 1D
LUZP1	1207.51	1318.76	1138.94	1040.87	1036.92	973.683	1169.39	1131.36	1275.85	1633.82	1039.32	2	130360071	130364944	leucine zipper protein 1
KDM1A	423.098	586.427	572.227	578.456	566.647	466.656	411.713	450.316	624.13	703.165	724.992	2	130370508	130436402	lysine (K)-specific demethylase 1A
LACTBL1	1	1	1	1	1	1	1	1	1	1	1	2	130466428	130478326	lactamase, beta-like 1
EPHB2	68.0284	93.7846	71.6518	31.4518	66.158	109.717	75.7865	63.0121	80.0475	102.062	175.032	2	130499451	130638749	EPH receptor B2
LOC100336526	31.7968	5.41832	31.0646	2.12784	24.608	18.3178	20.6161	2.08793	27.9098	23.8489	1	2	130618449	130636908	ephrin type-B receptor 2-like
C1QB	1	1	1	1	1	1	1	1	1	1	1	2	130769310	130771277	complement component 1, q subcomponent, B chain
C1QC	1	1	1	1	1	1	1	1	1	1	1	2	130784230	130787989	complement component 1, q subcomponent, C chain
C1QA	1	1	1	1	1	1	1	1	1	1	1	2	130793042	130794802	complement component 1, q subcomponent, A chain
EPHA8	1	1	1	1	1	1	1	1	1	1	1	2	130830284	130858979	EPH receptor A8
ZBTB40	370.562	500.27	427.917	514.169	424.055	308.391	323.44	475.338	371.01	309.46	426.302	2	130900428	130937992	zinc finger and BTB domain containing 40
MIR2284U	1	1	1	1	1	1	1	1	1	1	1	2	130903926	130903927	microRNA mir-2284u
CDC42	807.153	677.002	806.731	699.135	815.002	957.808	969.546	1257.56	951.252	842.894	803.208	2	131341665	131387419	cell division cycle 42 (GTP binding protein, 25kDa)
LOC515042	252.809	334.583	473.014	94.611	234.247	281.933	237.62	336.083	291.121	174.124	174.054	2	131410984	131411416	SCAN domain containing 1-like
CELA3B	1	1	4.00646	1	1	2.44315	1	1	1	1	1	2	131425578	131432693	chymotrypsin-like elastase family, member 3B
LOC100847958	1	1	1	1	1	1	1	1	1	1	1	2	131438540	131438541	uncharacterized LOC100847958
LOC789612	1	1	1	1	1	1	1	1	1	1	1	2	131465502	131466330	uncharacterized LOC789612
HSPG2	385.055	353.361	354.259	266.043	359.841	330.038	335.7	406.798	92.6615	229.489	260.581	2	131508855	131587200	heparan sulfate proteoglycan 2
LDLRAD2	1	1	1	2.12784	1	1	1	1	1	1	1	2	131587575	131596962	low density lipoprotein receptor class A domain containing 2
USP48	2156.78	1783.79	1913.11	1784.12	1950.07	1758.28	1565.39	1673.15	2264.79	2331.59	2946.34	2	131624284	131696069	ubiquitin specific peptidase 48
RAP1GAP	28.1737	89.3663	56.6195	56.2643	11.3875	28.4198	30.4242	60.8362	16.1368	39.6674	26.9092	2	131751525	131774701	RAP1 GTPase activating protein
ALPL	51.7242	67.2747	73.155	21.3012	37.8284	58.2449	16.9381	76.0673	27.0689	22.0913	28.3758	2	131792402	131812860	alkaline phosphatase, liver/bone/kidney
ECE1	22.7389	182.151	176.878	12.2784	8.55455	13.0262	31.6502	72.8035	25.387	1.8788	1	2	132005405	132058185	endothelin converting enzyme 1
EIF4G3	1368.74	2103.01	1743.24	1548.4	1400.48	1535.07	1621.78	1496.91	1371.72	707.559	835.473	2	132268551	132451412	eukaryotic translation initiation factor 4 gamma, 3
HP1BP3	133.245	236.275	227.988	211.907	249.356	132.808	106.437	214.235	151.527	293.642	317.288	2	132475463	132506093	heterochromatin protein 1, binding protein 3
SH2D5	2.81158	1	1	1	1	1	1	1	2.68186	4.51522	1	2	132522952	132529468	SH2 domain containing 5
KIF17	10.0579	13.1504	16.0323	17.9176	17.0534	9.6589	12.0341	61.9242	8.56838	1.8788	1	2	132533706	132584194	kinesin family member 17
DDOST	298.099	309.178	391.84	252.509	323.013	259.324	323.44	357.842	297.849	327.036	445.368	2	132587732	132600729	dolichyl-diphosphooligosaccharide--protein glycosyltransferase
PINK1	347.012	250.635	250.536	478.078	219.138	266.058	385.967	58.6604	269.257	266.399	291.868	2	132602460	132621710	PTEN induced putative kinase 1
CDA	15.4926	10.9412	1	3.25569	5.72159	1.9621	5.90403	10.7914	1.84093	15.0609	10.7771	2	132636851	132657195	cytidine deaminase
FAM43B	4.62316	3.20916	1	5.51137	1.94432	1.48105	2.22601	1	1	2.75761	1	2	132691771	132692743	family with sequence similarity 43, member B
MUL1	53.5358	36.3465	25.0517	6.63922	28.3852	42.8513	29.1982	48.869	30.4326	13.3033	14.6879	2	132731178	132737424	mitochondrial E3 ubiquitin protein ligase 1
CAMK2N1	1	1	1	1	1	1.48105	1	3.17586	1	1	1	2	132751756	132753556	calcium/calmodulin-dependent protein kinase II inhibitor 1
UBXN10	1	1	1	1	1	1	1	1	1	1	1	2	133067840	133068686	UBX domain protein 10
PLA2G2C	1	1	1	1	1	1	1	1	1	1	1	2	133085068	133100847	phospholipase A2, group IIC
PLA2G2F	1	1	1	1	1	3.40525	1	1	1	1	1	2	133115018	133124051	phospholipase A2, group IIF
PLA2G2D4	1	1	1	1	1	1	1	1	1	1	1.48885	2	133149386	133156742	calcium-dependent phospholipase A2 PLA2G2D4
PLA2G2D1	1	1	1	2.12784	1	1	1	1	1	1	4.42197	2	133176677	133188486	calcium-dependent phospholipase A2 PLA2G2D1
PLA2G5	1	1	1	1	1	1	1	22.7586	1	1	1	2	133224981	133231624	phospholipase A2, group V
PLA2G2A	1	1	1	1	1	1	1	1	1	1.8788	1	2	133269556	133271773	phospholipase A2, group IIA (platelets, synovial fluid)
LOC615045	1	1	1	1	1	1	1	1	1	1	1	2	133320366	133323397	phospholipase A2, membrane associated-like
PLA2G2E	1	1	1	1	1	1	1	1	1	1	1	2	133373262	133376607	phospholipase A2, group IIE
OTUD3	341.577	281.563	261.059	216.418	288.073	387.764	218.003	300.181	309.622	167.973	157.922	2	133387214	133416030	OTU domain containing 3
RNF186	1	2.10458	1	1	1	1	1	1	1	1	1	2	133473174	133473855	ring finger protein 186-like
HTR6	1	1	1	1	1	1	1	1	1	1	1	2	133610638	133623061	5-hydroxytryptamine (serotonin) receptor 6
NBL1	1	2.10458	1	1	3.83295	1.48105	5.90403	1	1	1	3.93312	2	133633045	133641645	neuroblastoma 1, DAN family BMP antagonist
MINOS1	881.427	431.786	943.525	1305.91	904.713	694.674	1149.77	1154.21	1061.41	2102.22	2131.91	2	133660440	133698163	mitochondrial inner membrane organizing system 1
CAPZB	3221.99	2541.53	2553.48	2039.01	2290.03	1652.93	2375.78	1894	2987.99	2427.38	2267.81	2	133789551	133925780	capping protein (actin filament) muscle Z-line, beta
PQLC2	29.9853	54.0198	31.0646	49.4973	70.8795	30.344	77.0125	31.4621	24.5461	35.2734	33.7532	2	133933108	133944261	PQ loop repeat containing 2
AKR7A2	4.62316	2.10458	4.00646	1	1.94432	2.44315	3.45202	1	6.88652	4.51522	1	2	133953069	133956445	aldo-keto reductase family 7, member A2 (aflatoxin aldehyde reductase)
AKR7A3	1	1	1	1	1	1	5.90403	1	1	1	1	2	133974540	133988521	aldo-keto reductase family 7, member A3 (aflatoxin aldehyde reductase)
MRTO4	113.318	98.203	137.794	139.725	182.309	96.2479	105.211	69.5397	87.6159	73.9407	62.5955	2	133993383	133998196	mRNA turnover 4 homolog (S. cerevisiae)
UBR4	14205.6	20262.3	14564.3	20018	17243.3	18364.6	19612.2	19261.7	16037.6	19233.6	15607.2	2	134039039	134175843	ubiquitin protein ligase E3 component n-recognin 4
IFFO2	68.0284	56.229	103.22	47.2416	83.1557	107.793	102.759	67.3638	198.619	64.2739	81.6608	2	134292812	134340283	intermediate filament family orphan 2
ALDH4A1	42.6663	181.046	127.271	57.3922	84.1	53.4344	81.9165	138.079	33.7963	12.4245	94.8598	2	134345974	134378892	aldehyde dehydrogenase 4 family, member A1
TAS1R2	1	1	1	1	1	1	1	1	1	1	1	2	134390906	134404755	taste receptor, type 1, member 2
PAX7	1	10.9412	1	1	1	1	1	1	1	1	1	2	134512628	134616219	paired box 7
KLHDC7A	1	1	1	3.25569	1	1	1	1	1	1	1	2	134776471	134778862	kelch domain containing 7A
IGSF21	1	1	1	1	1	1	1	1	1	12.4245	1	2	134864901	135060996	immunoglobin superfamily, member 21
ACTL8	1	1	1	1	1	1	1	1	1	1	1	2	135418585	135422028	actin-like 8
ARHGEF10L	4.62316	4.31374	2.50323	1	2.88864	6.29155	3.45202	1	5.20465	1	1	2	135557376	135672091	Rho guanine nucleotide exchange factor (GEF) 10-like
RCC2	990.122	890.186	969.08	1462.68	969.87	695.155	1153.45	824.564	792.316	731.286	1052.03	2	135784617	135809663	regulator of chromosome condensation 2
MIR2358	1	1	1	1	1	1	1	1	1	1	1	2	135810603	135810604	microRNA mir-2358
PADI6	4.62316	10.9412	1	14.5341	1.94432	4.36735	15.7121	3.17586	1.84093	1.8788	1	2	135812787	135832714	peptidyl arginine deiminase, type VI
PADI4	1	1	1	1	1	1.9621	1	1	1	1	1	2	135837176	135864707	peptidyl arginine deiminase, type IV
PADI3	1	1	1	1	1	1	1	1	1	1	1	2	135891756	135920575	peptidyl arginine deiminase, type III
PADI1	1	1	2.50323	1	3.83295	1	2.22601	1	1	1	1	2	135924499	135967530	peptidyl arginine deiminase, type I
PADI2	15.4926	14.2549	11.5226	24.6847	42.55	57.2828	4.67802	7.52759	4.36372	5.39402	1	2	136049723	136097941	peptidyl arginine deiminase, type II
SDHB	510.054	388.707	506.085	428.453	556.259	356.496	545.348	554.757	762.042	723.377	1191.85	2	136125323	136154257	succinate dehydrogenase complex, subunit B, iron sulfur (Ip)
ATP13A2	15.4926	17.5687	46.0969	31.4518	26.4966	33.7114	23.0681	14.0552	15.2958	15.9397	65.5286	2	136162767	136182178	ATPase type 13A2
MFAP2	1	1	1	1	1	1	1	1	4.36372	1	1	2	136187799	136191807	microfibrillar-associated protein 2
CROCC	1	2.10458	2.50323	12.2784	1	1	5.90403	2.08793	1.84093	4.51522	1	2	136193742	136239378	ciliary rootlet coiled-coil, rootletin
NECAP2	97.0137	162.269	116.749	182.583	147.369	89.9942	227.811	286.038	119.571	196.973	97.3041	2	136253592	136266388	NECAP endocytosis associated 2
SPATA21	1	6.5229	14.5291	2.12784	12.3318	8.6968	2.22601	14.0552	13.614	8.03043	1.97771	2	136276528	136317032	spermatogenesis associated 21
FBXO42	3921.26	3858.19	2482.83	2970.61	1572.35	1906.44	5811.05	3167.97	2146.21	2370.26	1709.54	2	136348322	136348529	F-box protein 42
RSG1	1	1	10.0194	1	1	4.36735	1	1	1	1	1	2	136457952	136461536	REM2 and RAB-like small GTPase 1
ARHGEF19	1	1	1	1	1	1	1	1	1	1	1	2	136480736	136491107	Rho guanine nucleotide exchange factor (GEF) 19
EPHA2	51.7242	189.883	116.749	122.807	33.1068	94.8047	51.2663	277.335	44.7284	15.9397	63.5732	2	136525536	136551506	EPH receptor A2
FAM131C	1	1	1	1	1	1	1	1	1	1	1	2	136609178	136617200	family with sequence similarity 131, member C
CLCNKA	1	1	1	1	1	1	1	1	1	1.8788	1	2	136618633	136630339	chloride channel Ka
C2H1orf64	2.81158	10.9412	8.51615	1	1.94432	4.36735	2.22601	1	1.84093	1.8788	1	2	136648151	136650861	chromosome 2 open reading frame, human C1orf64
LOC788414	19.1158	18.6733	19.0388	42.7302	22.7193	24.5714	16.9381	11.8793	38.8419	38.7886	32.7755	2	136768698	136781478	epithelial splicing regulatory protein 1-like
LOC100298143	1	1	1	1	1	1	1	1	1	1	1	2	136988989	136991002	uncharacterized LOC100298143
LOC790004	1	1	5.50969	1	1	1	1	1	1	6.27283	1	3	202371	208049	alpha-1,3-mannosyl-glycoprotein 4-beta-N-acetylglucosaminyltransferase C-like
TBX19	1	3.20916	17.5355	1	1	1	3.45202	31.4621	4.36372	8.03043	1	3	250999	276398	T-box 19
SFT2D2	11.8695	25.3007	23.5484	17.9176	28.3852	6.7726	24.2941	9.70345	5.20465	14.1821	6.37739	3	330069	345767	SFT2 domain containing 2
TIPRL	135.057	63.961	37.0775	51.7529	47.2716	33.7114	15.7121	70.6276	61.547	22.0913	70.4172	3	402047	464206	TIP41, TOR signaling pathway regulator-like (S. cerevisiae)
GPR161	2.81158	1	1	10.0227	3.83295	11.5831	5.90403	12.9672	4.36372	1	1	3	553189	575757	G protein-coupled receptor 161
DCAF6	236.505	160.059	154.329	209.651	222.915	141.467	134.635	195.74	299.53	160.942	174.054	3	587440	767973	DDB1 and CUL4 associated factor 6
BRP44	290.853	250.635	172.368	200.628	146.425	104.426	204.517	151.135	246.552	269.914	133.479	3	769037	798736	brain protein 44
MPZL1	133.245	135.759	176.878	76.5655	161.534	127.997	94.1766	160.926	114.526	74.8196	71.8837	3	933318	1012622	myelin protein zero-like 1
RCSD1	158.607	240.694	175.375	254.765	195.53	226.131	118.697	132.64	164.982	159.185	104.148	3	1060310	1130064	RCSD domain containing 1
CREG1	15.4926	7.62747	5.50969	12.2784	7.61023	3.40525	8.35605	11.8793	5.20465	12.4245	1	3	1197003	1207070	cellular repressor of E1A-stimulated genes 1
CD247	4.62316	288.191	1	6.63922	34.9955	2.9242	7.13004	1	8.56838	1.8788	1	3	1231122	1313869	CD247 molecule
POU2F1	225.636	200.929	211.452	189.35	259.743	309.353	161.607	388.304	282.712	443.039	335.865	3	1328479	1415064	POU class 2 homeobox 1
DUSP27	1	2.10458	1	1	1.94432	32.7493	1	2.08793	1	1	1	3	1657206	1687994	dual specificity phosphatase 27 (putative)
GPA33	1	1	1	1	1	2.44315	1	8.61552	1	1	6.86624	3	1726575	1779220	glycoprotein A33 (transmembrane)
MAEL	423.098	186.569	103.22	97.9945	92.5989	218.916	252.332	153.31	300.371	364.825	257.648	3	1881582	1937585	maelstrom homolog (Drosophila)
ILDR2	1	2.10458	2.50323	1	1	19.7609	4.67802	1	27.9098	10.6669	21.5318	3	1955323	2021161	immunoglobulin-like domain containing receptor 2
TADA1	8.24632	31.9282	25.0517	61.9035	63.325	51.5102	50.0403	15.1431	37.16	34.3946	34.7309	3	2089632	2104126	transcriptional adaptor 1
POGK	305.345	246.217	253.543	252.509	236.135	219.397	362.672	356.754	190.209	234.762	200.941	3	2115010	2124742	pogo transposable element with KRAB domain
FAM78B	6.43474	5.41832	1	1	7.61023	1	1	5.35173	1	1	1	3	2775287	2868130	family with sequence similarity 78, member B
UCK2	29.9853	86.0526	83.6776	49.4973	134.149	34.1924	35.3282	17.319	59.8652	44.9402	95.3487	3	3046046	3119584	uridine-cytidine kinase 2
TMCO1	131.434	198.72	247.53	215.29	186.086	183.799	281.756	242.521	211.233	272.551	216.095	3	3166834	3222125	transmembrane and coiled-coil domains 1
ALDH9A1	71.6516	37.4511	40.084	103.634	31.2182	63.5365	124.827	78.2431	31.2735	47.5766	113.925	3	3252251	3280573	aldehyde dehydrogenase 9 family, member A1
MGST3	120.564	63.961	86.6841	23.5569	34.9955	60.1691	31.6502	29.2862	53.1377	57.2435	40.5971	3	3296641	3302183	microsomal glutathione S-transferase 3
LRRC52	1	1	1	1	1	1	1	1	1	1	1	3	3425058	3446915	leucine rich repeat containing 52
RXRG	1	1	1	4.38353	1	1	1	1	1	1	1	3	3576968	3636573	retinoid X receptor, gamma
LMX1A	1	1	1	1	1	6.29155	4.67802	5.35173	1	1	1	3	3692342	3865786	LIM homeobox transcription factor 1, alpha
PBX1	6.43474	66.1702	41.5872	23.5569	9.49886	9.6589	19.3901	57.5724	45.5693	1	44.508	3	4228462	4527283	pre-B-cell leukemia homeobox 1
NUF2	863.312	491.433	581.247	752.143	571.368	439.717	508.567	426.381	593.856	504.555	661.93	3	6033974	6067994	NUF2, NDC80 kinetochore complex component, homolog (S. cerevisiae)
RGS5	1	1	1	1	1	1	1	1	1	1	1	3	6228429	6425035	regulator of G-protein signaling 5
RGS4	1	1	2.50323	67.5427	1.94432	10.14	1	1	1	1	1.97771	3	6287137	6291855	regulator of G-protein signaling 4
C3H1orf110	1	3.20916	1	1	1	11.1021	1	1	1	1	1	3	6562394	6568558	coiled-coil domain-containing protein C1orf110 homolog
HSD17B7	29.9853	33.0328	26.5549	51.7529	19.8864	65.9417	10.8081	94.5621	59.8652	13.3033	9.79936	3	6630464	6659054	hydroxysteroid (17-beta) dehydrogenase 7
DDR2	15.4926	45.1832	1	8.8949	17.9977	1	10.8081	2.08793	54.8196	1.8788	20.5541	3	6672219	6745690	discoidin domain receptor tyrosine kinase 2
UAP1	80.7095	99.3075	101.716	97.9945	75.6011	89.5132	73.3345	96.738	80.8884	105.578	25.9315	3	6900756	6927257	UDP-N-acteylglucosamine pyrophosphorylase 1
UHMK1	1	1	2.50323	1	4.77727	1.48105	1	1	27.9098	6.27283	1	3	6975866	6995683	U2AF homology motif (UHM) kinase 1
SH2D1B	4.62316	1	1	1	1	1	1	1	1	1	1	3	7070263	7074707	SH2 domain containing 1B
C3H1orf226	40.8547	40.7649	73.155	43.858	31.2182	76.0438	52.4923	88.0345	25.387	56.3647	71.8837	3	7105924	7107528	chromosome 3 open reading frame, human C1orf226
C3H1orf111	1	1	2.50323	5.51137	1	1	2.22601	1	1	1	1	3	7112389	7114969	chromosome 3 open reading frame, human C1orf111
NOS1AP	19.1158	24.1962	4.00646	13.4063	18.942	31.3061	29.1982	3.17586	22.8642	14.1821	21.043	3	7121503	7463486	nitric oxide synthase 1 (neuronal) adaptor protein
OLFML2B	1	1	1	2.12784	1	1	9.58206	4.26379	1	1	1	3	7528062	7576816	olfactomedin-like 2B
ATF6	2386.85	1667.81	2021.34	3623.63	2462.84	3418.86	3644.7	4053.55	3549.73	3237.64	3761.75	3	7614093	7843427	activating transcription factor 6
DUSP12	40.8547	24.1962	62.6324	31.4518	95.4318	41.4082	29.1982	10.7914	69.1154	8.03043	6.37739	3	7849875	7857668	dual specificity phosphatase 12
FCRLB	1	2.10458	1	1	1	1	3.45202	1	1	1	1	3	7881816	7886772	Fc receptor-like B
FCRLA	1	1	1	1	1	1	1	1	1	1	1	3	7898500	7904866	Fc receptor-like A
FCGR2	26.3621	326.851	58.1227	360.782	63.325	187.166	172.641	154.398	38.001	27.3641	106.592	3	7928601	7944528	Fc fragment of IgG, low affinity II, receptor for
FCGR3A	6.43474	2.10458	1	2.12784	1	1.9621	1	1	1	1	1	3	7996525	8003961	Fc fragment of IgG, low affinity IIIa, receptor (CD16a)
HSPA6	1	4.31374	1	2.12784	1	7.7347	2.22601	1	1	1	2.46656	3	8027844	8029776	heat shock 70kDa protein 6 (HSP70B')
FCGR2C	712.951	854.84	336.22	157.77	39.7171	51.9913	95.4026	109.793	94.3433	33.5158	81.1719	3	8033834	8040442	Fc fragment of IgG, low affinity IIc, receptor for (CD32)
C3H1orf192	37.2316	24.1962	28.0581	7.76706	66.158	51.0292	40.2323	6.43966	53.1377	66.9103	106.592	3	8161018	8192732	chromosome 3 open reading frame, human C1orf192
SDHC	279.983	341.21	465.498	270.555	272.019	316.569	411.713	246.873	301.212	439.523	555.36	3	8196196	8226041	succinate dehydrogenase complex, subunit C, integral membrane protein, 15kDa
MPZ	131.434	61.7518	50.6066	56.2643	124.706	78.449	130.957	20.5828	231.415	137.215	314.355	3	8229277	8232949	myelin protein zero
PCP4L1	37.2316	5.41832	1	25.8126	17.0534	8.6968	13.2601	3.17586	5.20465	18.5761	31.7978	3	8250934	8276535	Purkinje cell protein 4 like 1
NR1I3	1	1	1	1	1	1	1	1	1	1	1	3	8290731	8295138	nuclear receptor subfamily 1, group I, member 3
TOMM40L	113.318	92.6801	167.858	49.4973	72.7682	20.242	90.4986	49.9569	61.547	27.3641	118.325	3	8295581	8298433	translocase of outer mitochondrial membrane 40 homolog (yeast)-like
APOA2	1	1	1	1	5.72159	1	1	1	1	1	1	3	8301684	8302614	apolipoprotein A-II
FCER1G	2.81158	13.1504	4.00646	15.662	7.61023	3.8863	3.45202	1	12.773	6.27283	1.48885	3	8305836	8308708	Fc fragment of IgE, high affinity I, receptor for; gamma polypeptide
NDUFS2	790.848	952.043	1098.36	837.86	632.749	739.412	979.354	1142.24	1097.57	1597.79	1097.01	3	8309523	8318865	NADH dehydrogenase (ubiquinone) Fe-S protein 2, 49kDa (NADH-coenzyme Q reductase)
ADAMTS4	1	5.41832	1	19.0455	35.9398	27.9388	1	63.0121	27.9098	22.9701	1	3	8322937	8329784	ADAM metallopeptidase with thrombospondin type 1 motif, 4
B4GALT3	1843.38	2008.02	3027	1516.82	1308.88	2545.75	3806.53	2751.29	2751.68	2206.8	1837.62	3	8341134	8345016	UDP-Gal:betaGlcNAc beta 1,4- galactosyltransferase, polypeptide 3
PPOX	53.5358	67.2747	128.775	76.5655	94.4875	137.137	165.285	22.7586	153.208	117.002	98.2818	3	8345705	8349082	protoporphyrinogen oxidase
USP21	49.9126	111.458	124.265	149.875	249.356	62.0933	100.307	97.8259	65.7517	77.456	106.103	3	8350453	8355308	ubiquitin specific peptidase 21
UFC1	325.273	172.21	268.575	240.103	232.358	220.359	231.49	183.773	160.777	194.337	216.095	3	8357310	8360643	ubiquitin-fold modifier conjugating enzyme 1
DEDD	236.505	279.354	348.246	252.509	454.273	456.554	275.626	253.4	506.399	407.886	624.288	3	8389303	8391513	death effector domain containing
NIT1	2.81158	36.3465	121.258	17.9176	30.2739	23.6093	18.1641	31.4621	48.9331	23.8489	26.4204	3	8392892	8395457	nitrilase 1
PFDN2	69.84	86.0526	86.6841	57.3922	73.7125	97.691	86.8206	107.617	116.208	142.487	216.095	3	8395615	8407437	prefoldin subunit 2
KLHDC9	8.24632	1	4.00646	5.51137	9.49886	1.48105	8.35605	14.0552	6.88652	1.8788	1	3	8407874	8409563	kelch domain containing 9
PVRL4	20.9274	1	2.50323	1	9.49886	1	10.8081	1	27.9098	1.8788	1	3	8422078	8436722	poliovirus receptor-related 4
ARHGAP30	46.2895	1	1	2.12784	3.83295	2.44315	2.22601	1	1	1.8788	1	3	8439273	8453215	Rho GTPase activating protein 30
USF1	39.0432	27.5099	32.5678	17.9176	37.8284	47.1808	14.4861	15.1431	55.6605	28.2429	37.1752	3	8458003	8461025	upstream transcription factor 1
TSTD1	8.24632	1	1	1	9.49886	1.9621	18.1641	1	1	6.27283	1	3	8461986	8463255	thiosulfate sulfurtransferase (rhodanese)-like domain containing 1
F11R	812.587	1283.42	934.506	1057.79	791.394	605.199	671.626	524.295	725.042	745.347	606.2	3	8483639	8506418	F11 receptor
ITLN2	1	1	1	1	1	1.48105	10.8081	12.9672	13.614	8.03043	29.3535	3	8519571	8529680	intelectin 2
LOC786046	1	3.20916	17.5355	28.0682	10.4432	11.1021	5.90403	3.17586	33.7963	43.1826	30.82	3	8635004	8635005	intelectin-2-like
LOC100300695	1	1	1	1	1	1	1	1	1	1	1	3	8732487	8742611	intelectin 2-like
LOC788736	2.81158	4.31374	2.50323	3.25569	4.77727	1	1	1	3.52279	1	1	3	8771711	8771712	poly(A) binding protein interacting protein 1 pseudogene
CD244	1	1	1	1	1	1	1	1	1	1	1	3	8794792	8831582	CD244 molecule, natural killer cell receptor 2B4
LY9	1	1	1	1	1	1	1	1	1	1	1	3	8837401	8864379	lymphocyte antigen 9
SLAMF9	1	1	1	1	1	1	1	1	1	1	1	3	8879328	8892375	SLAM family member 9
PIFO	1	1	1	1	1	1	1	1	1	1	1	3	8921737	8927213	chromosome 3 open reading frame, human C1orf88-like
LOC100138271	1	1	1	1	1	1	1	1	1	1	1	3	8942583	8953557	oviduct-specific glycoprotein-like
SLAMF7	1	1	1	1	1	1	1	1	1	1	1	3	8970675	8985719	SLAM family member 7
CD48	388.678	217.498	304.652	538.981	583.644	387.764	481.595	258.84	219.642	439.523	314.844	3	9022968	9053226	CD48 molecule
SLAMF1	1	1	1	1	1	1	1	1	1	1	1	3	9090521	9128856	signaling lymphocytic activation molecule family member 1
CD84	15.4926	1	1	1	1	1	1	1	1	1	1	3	9198215	9239946	CD84 molecule
SLAMF6	11.8695	1	1	51.7529	1	1.48105	1	1	15.2958	1	10.2882	3	9272216	9292844	SLAM family member 6
VANGL2	1	1	1	1	1	2.44315	1	1	14.4549	1	6.86624	3	9385091	9394342	vang-like 2 (van gogh, Drosophila)
NHLH1	1	1	1	1	1	1	1	1	1	1	1	3	9442356	9442758	nescient helix loop helix 1
NCSTN	283.606	353.361	270.078	443.114	382.505	239.12	465.657	203.355	421.465	470.281	372.529	3	9453383	9468287	nicastrin
COPA	3499.16	4309.96	3613.26	3401.45	4144.67	3308.22	4228.28	3656.45	4063.54	3865.98	3804.28	3	9468505	9511898	coatomer protein complex, subunit alpha
PEX19	2471.99	2393.52	2499.37	2351.43	2256.98	2227.3	3297.74	2278.04	2571.73	2212.95	2745.42	3	9517716	9522109	peroxisomal biogenesis factor 19
DCAF8	316.215	297.027	388.833	305.518	381.56	206.408	282.982	180.509	170.027	258.49	155.967	3	9550981	9576161	DDB1 and CUL4 associated factor 8
PEA15	17.3042	15.3595	50.6066	42.7302	42.55	47.6618	35.3282	56.4845	39.6828	52.8494	41.086	3	9580363	9582245	phosphoprotein enriched in astrocytes 15
CASQ1	29.9853	27.5099	28.0581	5.51137	8.55455	3.8863	32.8762	28.1983	1	9.78804	1	3	9592296	9601261	calsequestrin 1 (fast-twitch, skeletal muscle)
ATP1A4	1	1	1	1	1	1	1	1	1	1	1	3	9605196	9637360	ATPase, Na+/K+ transporting, alpha 4 polypeptide
ATP1A2	2.81158	1	1	1	1	1	1	1	1	1	1	3	9647378	9670409	ATPase, Na+/K+ transporting, alpha 2 polypeptide
IGSF8	13.6811	10.9412	7.01292	15.662	21.775	9.6589	9.58206	10.7914	20.3414	10.6669	8.82165	3	9695218	9701733	immunoglobulin superfamily, member 8
KCNJ9	1	1	2.50323	1	2.88864	1	1	1	1	1	1	3	9705463	9709562	potassium inwardly-rectifying channel, subfamily J, member 9
KCNJ10	64.4053	100.412	43.0904	47.2416	49.1602	18.7988	37.7802	73.8914	43.0465	63.3951	3.44427	3	9750723	9751863	potassium inwardly-rectifying channel, subfamily J, member 10
PIGM	1461.13	1423.7	907.447	1393.89	958.539	1200.26	1288.31	1821.11	1349.85	1585.48	1131.72	3	9762075	9763347	phosphatidylinositol glycan anchor biosynthesis, class M
IGSF9	91.579	25.3007	49.1033	70.9263	36.8841	68.828	59.8484	67.3638	40.5237	100.305	64.5509	3	9859944	9877042	immunoglobulin superfamily, member 9
MIR1584	1	1	1	1	1	1	1	1	1	1	1	3	9881829	9881830	microRNA mir-1584
TAGLN2	606.067	472.655	794.705	500.634	352.286	591.729	482.821	1025.83	906.683	638.133	700.06	3	9884382	9885996	transgelin 2
CCDC19	2.81158	1	2.50323	1	1	1	1	1	1.84093	1	1	3	9901155	9930172	coiled-coil domain containing 19
VSIG8	1	1	2.50323	1	1	3.40525	1	1	1	1	1	3	9943085	9950485	V-set and immunoglobulin domain containing 8
SLAMF8	1	1	1	1	1	1	1	1	1	1	1	3	9968601	9977098	SLAM family member 8
FCRL6	1	1	1	1	1	1	1	1	1	1	1	3	9986768	10007505	Fc receptor-like 6
DUSP23	1	1	1	1	1	1	1	1	1	1	1	3	10029699	10030762	dual specificity phosphatase 23
CRP	1	1	1	1	1	1	1	1	1	1	1	3	10100507	10101419	C-reactive protein, pentraxin-related
LOC530245	1	1	1	1	1	1	1	1	1	1	1	3	10245614	10245615	olfactory receptor 10J1-like
APCS	1	1	1	1	1	1	1	1	1	1	1	3	10245921	10246706	amyloid P component, serum
LOC100848694	1	1	1	1	1	1	1	1	1	1	1	3	10292869	10293235	BRCA1 associated RING domain 1 pseudogene
OR10J5	1	1	1	1	1	1	1	1	1	1	1	3	10295276	10296206	olfactory receptor, family 10, subfamily J, member 5
LOC616952	1	1	1	1	1	1	1	1	1	1	1	3	10388029	10390882	olfactory receptor, family 10, subfamily J, member 1-like
OR10J3	1	1	1	1	1	1	1	1	1	1	1	3	10399266	10400202	olfactory receptor, family 10, subfamily J, member 3
LOC530601	1	1	1	1	1	1	1	1	1	1	1	3	10461617	10462547	olfactory receptor, family 10, subfamily J, member 1-like
FCER1A	1	1	1	1	1	1	1	1	1	1	1	3	10540245	10546147	Fc fragment of IgE, high affinity I, receptor for; alpha polypeptide
LOC538552	1	1	1	1	1	1	1	1	1	1	1	3	10575885	10576956	olfactory receptor, family 10, subfamily J, member 1-like
MPTX	1	1	1	1	1	1	1	1	1	1	1	3	10579453	10582672	putative mucosal pentraxin homolog
DARC	2.81158	4.31374	1	12.2784	1	13.9884	4.67802	4.26379	17.8186	1	1	3	10647479	10648898	Duffy blood group, chemokine receptor
CADM3	29.9853	7.62747	5.50969	57.3922	50.1046	114.528	29.1982	27.1104	27.0689	19.4549	19.0876	3	10652770	10683277	cell adhesion molecule 3
IFI16	48.1011	18.6733	31.0646	14.5341	21.775	26.4956	13.2601	15.1431	12.773	47.5766	10.2882	3	10840439	10866055	interferon, gamma-inducible protein 16
LOC519294	1	1	1	1	1	1	1	1	1	1	1	3	10977983	10978928	olfactory receptor, family 6, subfamily N, member 1-like
LOC526177	1	1	1	1	1	1	1	1	1	1	1	3	10991141	10992086	olfactory receptor, family 6, subfamily N, member 1-like
LOC790121	1	1	1	1	1	1	1	1	1	1	1	3	11009618	11010572	olfactory receptor 6N2-like
OR6N1	1	1	1	1	1	1	1	1	1	1	1	3	11029724	11030663	olfactory receptor, family 6, subfamily N, member 1
LOC508766	1	1	1	1	1	1	1	1	1	1	1	3	11039858	11041548	olfactory receptor 6K6-like
LOC617783	1	1	1	1	1	1	1	1	1	1	1	3	11055064	11058392	olfactory receptor 6K3-like
OR6K2	1	1	1	1	1	1	2.22601	1	1	1.8788	1	3	11104356	11105301	olfactory receptor, family 6, subfamily K, member 2
SPTA1	2.81158	25.3007	26.5549	6.63922	1.94432	43.8134	31.6502	32.55	17.8186	35.2734	48.9076	3	11113085	11143025	spectrin, alpha, erythrocytic 1 (elliptocytosis 2)
OR10Z1	1	1	1	1	1	1	1	1	1	1	1	3	11214137	11215079	olfactory receptor, family 10, subfamily Z, member 1
LOC513494	1	1	1	1	1	1	1	1	1	1	1	3	11236899	11240044	olfactory receptor, family 10, subfamily X, member 1-like
LOC100337392	1	1	1	1	1	1	1	1	1	1	1	3	11276411	11277356	olfactory receptor 6-like
LOC509633	1	1	1	1	1	1	1	1	1	1	1	3	11319075	11321743	olfactory receptor, family 10, subfamily X, member 1-like
OR6P1	1	1	1	1	1	1	1	1	1	1	1	3	11340118	11341072	olfactory receptor, family 6, subfamily P, member 1
OR6Y1	1	1	1	1	1	1	1	1	1	1	1	3	11354961	11355939	olfactory receptor, family 6, subfamily Y, member 1
LOC616705	1	1	1	1	1	1	1	1	1	1	1	3	11412347	11413301	olfactory receptor, family 10, subfamily R, member 2-like
OR10K1	1	1	1	1	1	1	1	1	1	1	1	3	11435547	11436489	olfactory receptor, family 10, subfamily K, member 1
OR10K2	1	1	1	1	1	1	1	1	1	1	1	3	11458291	11459501	olfactory receptor, family 10, subfamily K, member 2
OR10R2	1	1	1	1	1	1	1	1	1	1	1	3	11482658	11488645	olfactory receptor, family 10, subfamily R, member 2
CD1A	1	1	1	1	1	1	1	1	1	1	1	3	11536230	11539751	CD1a molecule
LOC508806	1	1	1	1	1	1	1	1	1	1	1	3	11610518	11611460	olfactory receptor, family 10, subfamily K, member 1-like
LOC513884	1	1	1	1	1	1	1	1	1	1	1	3	11643167	11644109	olfactory receptor, family 10, subfamily K, member 1-like
LOC522554	1	1	1	1	1	1	1	1	1	1	1	3	11676780	11677725	olfactory receptor, family 10, subfamily R, member 2-like
OR10T2	1	1	1	1	1	1	1	1	1	1	1	3	11692442	11693384	olfactory receptor, family 10, subfamily T, member 2
CD1E	1	8.73205	1	1	1.94432	43.3324	1	1	1	5.39402	1	3	11724929	11727777	CD1e molecule
LOC507767	1	1	1	1	1	1	1	1	1	1	1	3	11786480	11786481	T-cell surface glycoprotein CD1b-1-like
LOC788163	1	1	1	1	1	1	1	1	1	1	1	3	11796698	11796699	T-cell surface glycoprotein CD1a-like
CD1B	1	1	1	1	1	1	1	1	1	1	1	3	11848077	11851427	CD1b molecule
LOC509005	1	1	1	1	1	1	1	1	1	1	1	3	11856664	11860526	T-cell surface glycoprotein CD1b-2-like
LOC781726	1	1	1	1	1	1	1	1	1	1	1	3	11880284	11883732	T-cell surface glycoprotein CD1b-2-like
LOC781813	1	1	1	1	1	1	1	1	1	1	1	3	11905211	11905212	eukaryotic translation elongation factor 1 alpha 1 pseudogene
CD1D	1	1	1	2.12784	1	3.8863	1	1	1	1	1	3	12110065	12113173	CD1D antigen, d polypeptide
LOC782367	1	1	1	5.51137	3.83295	1	1	1	1	1	1	3	12141257	12169430	antigen-presenting glycoprotein CD1d-like
LOC788175	1	1	1	1	1	1	1	1	1	1	1	3	12170345	12173675	CD1D antigen, d polypeptide-like
LOC512286	1	1	1	1	1	14.9504	1	16.231	1	1	1	3	12186756	12189847	antigen-presenting glycoprotein CD1d-like
LOC531264	1	1	1	1	1	1	2.22601	1	1	1	1	3	12425742	12489236	Fc receptor-like protein 2-like
CD5L	2.81158	1	1	2.12784	10.4432	1	1	1	1	1	1	3	12547090	12563851	CD5 molecule-like
FCRL1	1	28.6145	4.00646	16.7898	37.8284	17.3557	72.1085	8.61552	20.3414	1	3.93312	3	12638924	12645558	Fc receptor-like 1
FCRL3	1	1	1	1	1	1	1	1	1	1	1	3	12673697	12717577	Fc receptor-like 3
FCRL4	1	1	1	1	1	1	1	1	1	1	1	3	12788327	12808789	Fc receptor-like 4
LOC100849046	1	2.10458	1	1	19.8864	3.40525	1	1	23.7051	1	1	3	12975888	12994165	T-lymphocyte surface antigen Ly-9-like
LOC784007	1	15.3595	1	2.12784	1	1.48105	1	1	1	1	1	3	13094906	13104465	T-lymphocyte surface antigen Ly-9-like
ETV3	761.863	699.094	519.614	1178.47	832	1042.95	859.206	655.935	667.017	667.134	775.344	3	13743910	13753402	ets variant 3
ETV3L	1	1	1	1	1	1	1	1	1	1	1	3	13778326	13784728	ets variant 3-like
LRRC71	1	4.31374	1	5.51137	13.2761	8.6968	2.22601	1	1	1	1	3	13976192	13985348	leucine rich repeat containing 71
PEAR1	1	2.10458	1	4.38353	1.94432	12.5452	7.13004	3.17586	7.72745	8.03043	1	3	13987528	13997515	platelet endothelial aggregation receptor 1
NTRK1	1	1	25.0517	1	1.94432	5.32945	1	1	1	1	1	3	14019443	14037555	neurotrophic tyrosine kinase, receptor, type 1
INSRR	1	1	1	1	3.83295	10.14	27.9722	2.08793	1	9.78804	1	3	14039799	14055462	insulin receptor-related receptor
SH2D2A	13.6811	3.20916	5.50969	1	17.9977	1	8.35605	15.1431	1	1	1	3	14075332	14084234	SH2 domain containing 2A
PRCC	111.506	60.6473	80.6712	61.9035	69.9352	85.6648	62.3004	90.2104	64.9107	46.6978	101.704	3	14090621	14117556	papillary renal cell carcinoma (translocation-associated)
HDGF	153.173	141.282	121.258	171.304	166.256	152.531	113.793	140.255	55.6605	152.154	101.704	3	14130480	14138410	hepatoma-derived growth factor
MRPL24	64.4053	55.1244	70.1486	21.3012	56.7148	33.7114	18.1641	32.55	34.6372	10.6669	33.7532	3	14145063	14146355	mitochondrial ribosomal protein L24
RRNAD1	6.43474	4.31374	1	1	11.3875	4.8484	10.8081	2.08793	6.04559	1.8788	4.42197	3	14146979	14153479	ribosomal RNA adenine dimethylase domain containing 1
ISG20L2	216.578	163.373	197.923	107.017	136.038	120.3	64.7524	131.552	143.117	82.7288	208.763	3	14154893	14158461	interferon stimulated exonuclease gene 20kDa-like 2
CRABP2	4.62316	1	5.50969	5.51137	1	17.3557	1	5.35173	1	16.8185	1	3	14173265	14178237	cellular retinoic acid binding protein 2
NES	861.5	1351.9	1212.6	1120.95	426.888	1207.47	568.642	3664.07	283.553	1248.02	729.88	3	14208427	14215064	nestin
BCAN	33.6084	42.974	7.01292	25.8126	1	22.6472	24.2941	28.1983	10.2502	37.9098	1.97771	3	14223979	14237534	brevican
HAPLN2	1	1	1	1	1	1	1	1	1	1	1	3	14254829	14256803	hyaluronan and proteoglycan link protein 2
GPATCH4	318.026	408.59	683.466	245.742	163.423	350.723	357.768	200.091	301.212	371.855	338.798	3	14282920	14287222	G patch domain containing 4
APOA1BP	84.3326	94.8892	95.7035	116.04	153.035	115.009	197.161	151.135	131.344	95.032	193.608	3	14288105	14290415	apolipoprotein A-I binding protein
TTC24	48.1011	25.3007	20.542	21.3012	23.6636	25.5335	16.9381	4.26379	33.7963	24.7277	37.1752	3	14294984	14301746	tetratricopeptide repeat domain 24
IQGAP3	1772.72	2371.43	1722.2	2067.21	2757.46	1138.68	1684.31	1143.33	1915.8	2075.86	1940.28	3	14306405	14346150	IQ motif containing GTPase activating protein 3
LOC100848553	1	1	1	1	1	1	1	1	1	1	1	3	14373563	14375088	uncharacterized LOC100848553
MEF2D	147.738	157.85	134.787	198.373	221.026	262.21	164.059	220.762	244.029	268.156	220.006	3	14399973	14412378	myocyte enhancer factor 2D
LOC100848574	8.24632	9.83663	2.50323	3.25569	7.61023	7.7347	5.90403	16.231	6.04559	4.51522	3.44427	3	14474958	14477348	uncharacterized LOC100848574
RHBG	1	2.10458	2.50323	2.12784	1	18.7988	1	1	1.84093	15.0609	1	3	14494070	14507407	Rh family, B glycoprotein
CCT3	3720.17	4184.04	5284.85	4153.72	7507.39	4148.13	4054.18	3901.23	4937.26	5396.86	6075	3	14538820	14553077	chaperonin containing TCP1, subunit 3 (gamma)
C3H1orf85	470.199	503.584	536.15	506.274	705.461	415.184	419.069	480.778	658.608	606.496	455.145	3	14558547	14561060	chromosome 3 open reading frame, human C1orf85
TMEM79	124.187	184.36	151.323	241.231	156.812	158.784	170.189	148.959	296.167	230.368	137.879	3	14562448	14566792	transmembrane protein 79
SMG5	1153.16	1209.41	1018.69	779.212	1333.43	1156.96	1333.67	1067.17	1426.38	1166.29	1244.15	3	14569572	14595780	smg-5 homolog, nonsense mediated mRNA decay factor (C. elegans)
PAQR6	6.43474	12.0458	4.00646	4.38353	15.1648	1	1	7.52759	9.40931	1	11.7548	3	14599918	14602534	progestin and adipoQ receptor family member VI
BGLAP	1	1	1	1	1	1	1	1	1	1	1	3	14603454	14604363	bone gamma-carboxyglutamate (gla) protein
PMF1	39.0432	44.0786	8.51615	13.4063	20.8307	10.621	29.1982	23.8466	73.3201	67.7891	39.6194	3	14606421	14627719	polyamine-modulated factor 1
SLC25A44	435.779	557.708	429.42	430.708	628.027	514.28	368.802	282.774	545.923	508.07	615.489	3	14630405	14639660	solute carrier family 25, member 44
SEMA4A	44.4779	54.0198	53.613	82.2047	72.7682	53.9155	21.8421	70.6276	50.6149	41.425	57.2181	3	14659979	14679199	sema domain, immunoglobulin domain (Ig), transmembrane domain (TM) and short cytoplasmic domain, (se
LMNA	135.057	185.465	379.814	199.5	192.697	132.808	208.195	183.773	78.3656	151.276	171.121	3	14697481	14715053	lamin A/C
MEX3A	1	1	1	1	1.94432	4.8484	1	7.52759	1.84093	1	1	3	14745189	14750311	mex-3 homolog A (C. elegans)
RAB25	124.187	50.7061	133.284	104.762	57.6591	75.0817	112.567	133.728	109.48	179.397	44.9968	3	14755790	14762427	RAB25, member RAS oncogene family
LAMTOR2	2.81158	8.73205	19.0388	6.63922	45.383	11.1021	20.6161	9.70345	5.20465	16.8185	21.043	3	14763945	14766824	late endosomal/lysosomal adaptor, MAPK and MTOR activator 2
UBQLN4	15.4926	21.987	29.5614	19.0455	14.2204	4.8484	8.35605	1	7.72745	22.9701	15.1768	3	14767964	14773698	ubiquilin 4
LOC783646	1	1	1	1	1	1	1	1	1	1	1	3	14800164	14802008	uncharacterized LOC783646
SSR2	874.181	694.676	911.957	891.996	1001.03	970.796	1005.1	1317.4	1544.11	1548.57	1645.99	3	14809176	14814712	signal sequence receptor, beta (translocon-associated protein beta)
LOC783721	20.9274	1	7.01292	4.38353	6.66591	13.0262	8.35605	40.1655	44.7284	1.8788	5.39968	3	14826712	14828607	uncharacterized LOC783721
ARHGEF2	31.7968	25.3007	22.0452	35.9631	52.9375	54.8776	21.8421	32.55	23.7051	69.5467	50.3742	3	14843710	14866805	Rho/Rac guanine nucleotide exchange factor (GEF) 2
RXFP4	2.81158	1	1	1	1	1	1	1	1	1	1	3	14871597	14872719	relaxin/insulin-like family peptide receptor 4
KIAA0907	180.346	172.21	172.368	151.003	143.592	125.592	157.929	159.838	160.777	92.3956	145.212	3	14889709	14904696	KIAA0907 ortholog
MIR1940	1	1	1	1	1	1	1	1	1	1	1	3	14896591	14896592	microRNA mir-1940
RIT1	73.4632	73.9022	154.329	100.25	37.8284	66.4228	99.0806	126.112	72.4791	211.913	89.4825	3	14908687	14914869	Ras-like without CAAX 1
SYT11	19.1158	1	50.6066	38.2188	61.4364	1	31.6502	3.17586	35.4782	6.27283	1	3	14929777	14945975	synaptotagmin XI
GON4L	1414.03	924.428	737.583	963.05	893.381	798.581	824.877	1066.09	1212.78	1185.63	794.409	3	15009726	15093150	gon-4-like (C. elegans)
MSTO1	138.68	92.6801	70.1486	90.0996	58.6034	87.1079	90.4986	47.7811	47.2512	46.6978	147.656	3	15093556	15097660	misato homolog 1 (Drosophila)
LOC100848721	44.4779	4.31374	5.50969	5.51137	2.88864	9.6589	18.1641	65.188	24.5461	7.15163	3.93312	3	15098259	15100775	uncharacterized LOC100848721
DAP3	700.269	947.624	555.692	950.644	1057.69	761.54	1323.86	839.795	1155.6	795.439	1458.76	3	15106387	15122824	death associated protein 3
ASH1L	1077.08	1159.7	972.086	903.274	1171.95	1124.25	1143.64	969.259	1087.48	1322.72	965.508	3	15176830	15351039	ash1 (absent, small, or homeotic)-like (Drosophila)
RUSC1	104.26	107.04	79.1679	108.145	70.8795	62.0933	79.4645	27.1104	50.6149	60.7587	52.3296	3	15356229	15364793	RUN and SH3 domain containing 1
FDPS	151.361	162.269	164.852	64.1592	109.597	78.9301	205.743	219.674	108.639	145.124	88.5048	3	15366098	15374032	farnesyl diphosphate synthase
PKLR	6.43474	15.3595	2.50323	1	1.94432	1	1	1	1.84093	1	1	3	15400195	15407846	pyruvate kinase, liver and RBC
HCN3	1	5.41832	1	23.5569	9.49886	5.8105	5.90403	1	1	1	1	3	15409812	15418775	hyperpolarization activated cyclic nucleotide-gated potassium channel 3
CLK2	375.997	383.184	333.214	334.842	391.948	369.965	344.282	447.052	399.601	544.98	469.81	3	15424537	15431194	CDC-like kinase 2
SCAMP3	102.448	132.445	176.878	143.108	189.864	106.35	145.669	114.145	186.846	214.549	247.871	3	15432207	15436117	secretory carrier membrane protein 3
FAM189B	187.593	232.962	387.33	266.043	308.848	196.306	204.517	238.169	218.801	80.0924	215.118	3	15437758	15442475	family with sequence similarity 189, member B
GBA	386.866	290.4	451.969	710.413	839.555	1053.54	910.698	767.992	1210.26	900.896	878.981	3	15459161	15463867	glucosidase, beta, acid
MTX1	209.332	154.536	267.072	132.958	131.316	105.388	167.737	83.6828	160.777	106.457	245.916	3	15464551	15468950	metaxin 1
THBS3	15.4926	23.0916	38.5807	35.9631	10.4432	8.21575	5.90403	9.70345	9.40931	20.3337	4.42197	3	15470341	15480201	thrombospondin 3
MIR92B	1	1	1	1	1	1	1	1	1	1	1	3	15480819	15480820	microRNA mir-92b
MUC1	8.24632	47.3923	43.0904	19.0455	49.1602	49.105	32.8762	379.6	80.8884	9.78804	7.35509	3	15482855	15486644	mucin 1, cell surface associated
TRIM46	20.9274	8.73205	8.51615	8.8949	4.77727	1.48105	1	20.5828	3.52279	4.51522	4.42197	3	15489357	15498217	tripartite motif containing 46
KRTCAP2	20.9274	21.987	52.1098	59.6478	68.9909	46.2187	52.4923	58.6604	38.001	64.2739	65.0398	3	15498969	15501455	keratinocyte associated protein 2
DPM3	4.62316	13.1504	11.5226	13.4063	1	6.7726	1	3.17586	4.36372	5.39402	7.35509	3	15517385	15517664	dolichyl-phosphate mannosyltransferase polypeptide 3
EFNA1	13.6811	10.9412	25.0517	11.1506	1.94432	14.9504	25.5202	46.6931	7.72745	8.90924	22.0207	3	15522318	15527991	ephrin-A1
LOC100847763	1	1	1	1	1	1	1	1	1	1	1	3	15522400	15526743	uncharacterized LOC100847763
EFNA3	1	2.10458	1	1	1	1.48105	2.22601	1	3.52279	1	1	3	15568316	15576014	ephrin-A3
EFNA4	2.81158	18.6733	19.0388	29.1961	24.608	41.8892	56.1704	49.9569	1	19.4549	21.5318	3	15588116	15591609	ephrin-A4
ADAM15	24.5505	1	8.51615	1	1	5.8105	1	4.26379	1.84093	1	1	3	15593458	15603262	ADAM metallopeptidase domain 15
DCST1	1	1	1	1	1	1	1	1	1	1	1	3	15603804	15619232	DC-STAMP domain containing 1
DCST2	1	1	1	4.38353	1	1	1	1	1	1	1	3	15619545	15633242	DC-STAMP domain containing 2
ZBTB7B	28.1737	13.1504	13.0258	16.7898	17.9977	24.5714	12.0341	18.4069	32.1144	27.3641	41.5748	3	15635202	15637183	zinc finger and BTB domain containing 7B
FLAD1	28.1737	56.229	43.0904	30.3239	72.7682	27.4577	63.5264	79.3311	53.1377	79.2136	20.5541	3	15658918	15664103	FAD1 flavin adenine dinucleotide synthetase homolog (S. cerevisiae)
LOC100294857	1	1	1	1	1	1	1	1	1	1	1	3	15662420	15663161	uncharacterized LOC100294857
CKS1B	178.535	41.8694	146.813	77.6933	123.761	162.152	144.443	58.6604	160.777	73.0619	164.766	3	15667603	15670973	CDC28 protein kinase regulatory subunit 1B
SHC1	1539.03	2008.02	1517.76	2327.74	2354.24	3195.17	1788.52	2504.33	1532.34	1448.39	1945.66	3	15674960	15680338	SHC (Src homology 2 domain containing) transforming protein 1
PYGO2	263.679	195.406	100.213	122.807	107.708	119.338	160.381	219.674	48.0921	89.7592	144.234	3	15682527	15684836	pygopus homolog 2 (Drosophila)
LOC100294894	1	1	1	1	1	1	1	1	1	1	1	3	15688976	15699460	uncharacterized LOC100294894
PBXIP1	28.1737	33.0328	34.071	39.3467	51.9932	35.1545	23.0681	4.26379	16.9777	13.3033	37.664	3	15689793	15697893	pre-B-cell leukemia homeobox interacting protein 1
PMVK	8.24632	1	2.50323	3.25569	1	6.7726	1	1	12.773	4.51522	1	3	15715734	15725121	phosphomevalonate kinase
KCNN3	1	1	1	1	4.77727	1	2.22601	1	11.9321	1.8788	2.46656	3	15781067	15948331	potassium intermediate/small conductance calcium-activated channel, subfamily N, member 3
ADAR	1122.37	1147.55	981.106	1499.9	949.095	1205.07	1175.52	1525.19	1110.19	1112.69	732.813	3	16025764	16051923	adenosine deaminase, RNA-specific
CHRNB2	1	31.9282	31.0646	14.5341	6.66591	2.9242	1	6.43966	7.72745	1	6.86624	3	16059670	16067513	cholinergic receptor, nicotinic, beta 2 (neuronal)
UBE2Q1	241.94	217.498	227.988	312.285	174.755	261.729	176.319	318.676	366.805	288.369	159.877	3	16080088	16087948	ubiquitin-conjugating enzyme E2Q family member 1
TDRD10	1	1	1	1	1	1	1	1	1	1	1	3	16090507	16139723	tudor domain containing 10
SHE	10.0579	16.4641	23.5484	49.4973	2.88864	32.2682	18.1641	57.5724	26.2279	1	1	3	16143971	16161015	Src homology 2 domain containing E
IL6R	671.284	1309.93	907.447	736.354	549.649	505.621	708.407	661.375	522.377	604.738	985.062	3	16180535	16231722	interleukin 6 receptor
ATP8B2	131.434	251.739	200.93	192.733	225.748	279.047	154.251	288.214	179.277	322.642	161.833	3	16270296	16288132	ATPase, class I, type 8B, member 2
HAX1	165.854	98.203	80.6712	104.762	183.253	94.8047	278.078	138.079	207.028	198.731	65.0398	3	16308118	16310487	HCLS1 associated protein X-1
UBAP2L	3946.62	4921.9	3656.85	3429.64	3881.2	3227.88	3276.89	3076.58	4190.52	4308.02	5003.44	3	16318479	16354003	ubiquitin associated protein 2-like
MIR2411	1	1	1	1	1	1	1	1	1	1	1	3	16327591	16327592	microRNA mir-2411
C3H1orf43	164.042	167.791	154.329	102.506	162.478	85.6648	167.737	82.5949	133.026	178.518	207.785	3	16358684	16366209	chromosome 3 open reading frame, human C1orf43
C3H1orf189	1	1	1	1	1	1	1	1	1	1	1	3	16367494	16370337	chromosome 3 open reading frame, human C1orf189
MIR190B	1	1	1	1	1	1	1	1	1	1	1	3	16374681	16374682	microRNA mir-190b
TPM3	1522.73	2027.9	1907.1	2080.74	2145.55	2327.84	2584.2	2262.81	2419.52	2902.81	3266.54	3	16376488	16394890	tropomyosin 3
NUP210L	49.9126	25.3007	40.084	30.3239	8.55455	36.5977	15.7121	21.6707	42.2056	6.27283	30.3312	3	16404891	16505322	nucleoporin 210kDa-like
RPS27	91.579	71.6931	212.955	148.747	136.982	150.607	117.471	205.531	177.595	212.792	271.336	3	16507246	16507247	ribosomal protein S27 pseudogene
RAB13	124.187	135.759	142.304	102.506	78.4341	108.755	126.053	177.245	143.958	130.184	45.4856	3	16511212	16514700	RAB13, member RAS oncogene family
JTB	2.81158	1	5.50969	35.9631	23.6636	14.9504	19.3901	1	28.7507	3.63641	22.5096	3	16519659	16521279	jumping translocation breakpoint
CREB3L4	1	14.2549	5.50969	1	13.2761	1	12.0341	1	1	1	1	3	16521861	16526868	cAMP responsive element binding protein 3-like 4
SLC39A1	107.883	120.295	122.762	66.4149	113.374	107.312	118.697	225.114	69.9563	88.0016	198.986	3	16531572	16533820	solute carrier family 39 (zinc transporter), member 1
CRTC2	191.216	171.105	160.342	279.577	215.36	228.056	301.372	193.564	178.436	131.942	285.513	3	16535416	16544448	CREB regulated transcription coactivator 2
DENND4B	53.5358	29.7191	44.5937	40.4745	47.2716	33.2303	29.1982	26.0224	30.4326	25.6065	27.3981	3	16550565	16561051	DENN/MADD domain containing 4B
GATAD2B	799.906	562.126	572.227	970.945	380.616	496.962	432.555	881.137	728.405	1335.9	520.651	3	16633873	16644316	GATA zinc finger domain containing 2B
SLC27A3	1	3.20916	1	17.9176	8.55455	29.863	4.67802	35.8138	1	1	14.6879	3	16679145	16684075	solute carrier family 27 (fatty acid transporter), member 3
INTS3	5044.44	4857.83	4340.82	4432.3	5038.94	4215.48	5652.9	3727.17	4582.39	5165.73	7428.15	3	16686068	16724149	integrator complex subunit 3
NPR1	1	2.10458	1	1	1	2.9242	1	2.08793	2.68186	1	1	3	16747869	16760778	natriuretic peptide receptor A/guanylate cyclase A (atrionatriuretic peptide receptor A)
ILF2	656.792	859.258	1035.22	588.606	832.944	592.21	707.181	946.413	677.949	459.736	827.162	3	16772772	16782869	interleukin enhancer binding factor 2, 45kDa
SNAPIN	102.448	58.4381	47.6001	145.364	33.1068	71.7143	65.9784	12.9672	39.6828	51.0918	86.5493	3	16783931	16785085	SNAP-associated protein
CHTOP	245.563	355.57	288.117	350.631	389.115	322.341	285.434	341.523	400.442	485.221	511.852	3	16802916	16809944	chromatin target of PRMT1
S100A1	1	1	2.50323	1	1	1	1	1	1	1	1	3	16812762	16814222	S100 calcium binding protein A1
S100A13	1	1	1	1	1	2.44315	1	1	1	1	1	3	16818457	16824039	S100 calcium binding protein A13
S100A14	1160.41	1105.58	1430.57	1310.43	799.893	1216.61	1580.1	1210.78	1513.83	1492.33	961.597	3	16827811	16828785	S100 calcium binding protein A14
S100A16	2202.07	1263.53	1926.64	1594.64	1408.98	2356.7	2288.73	2025.64	1761.91	1741.91	1134.65	3	16836232	16836829	S100 calcium binding protein A16
S100A2	8.24632	6.5229	13.0258	5.51137	4.77727	69.3091	1	4.26379	39.6828	33.5158	1.97771	3	16870713	16872520	S100 calcium binding protein A2
S100A3	1	5.41832	1	2.12784	1.94432	20.242	5.90403	10.7914	1	2.75761	2.46656	3	16883247	16884607	S100 calcium binding protein A3
S100A4	1	1	1	1	1	2.9242	1	1	1	1	1	3	16887127	16888436	S100 calcium binding protein A4
S100A5	6.43474	72.7976	35.5743	11.1506	21.775	69.3091	132.183	26.0224	32.9554	34.3946	62.1067	3	16892591	16894569	S100 calcium binding protein A5
S100A6	1	3.20916	1	1	1	1	1	1	1	1	1	3	16895910	16897812	S100 calcium binding protein A6
S100A7	1	1	1	1	1	1	1	2.08793	1	1	1	3	16969076	16971393	S100 calcium binding protein A7
LOC786371	1	1	1	1	1	1	1	1	1	1	1	3	17137844	17140401	protein S100-A15A-like
S100A8	1	1	1	1	1	1	1	1	1	1	1	3	17147409	17147829	S100 calcium binding protein A8
S100A12	1	1	1	1	1	1	1	1	1	1	1	3	17164416	17165153	S100 calcium binding protein A12
S100A9	1	1	1	1	1	1	1	1	1	1	1	3	17176309	17178516	S100 calcium binding protein A9
PGLYRP4	1	1	1	1	1	5.8105	2.22601	1	1	1	1	3	17186634	17203502	peptidoglycan recognition protein 4
PGLYRP3	1	1	8.51615	3.25569	1	1	1	1	1	1	1	3	17212757	17224318	peptidoglycan recognition protein 3
LOR	1	1	1	1	1	1	1	1	1	1	1	3	17273961	17275044	loricrin
PRR9	1	1	1	2.12784	1	1.9621	1	2.08793	1	1	1	3	17323946	17325137	proline rich 9
LELP1	1	1	1	1	1	1	1	1	1	1	1	3	17335250	17335583	late cornified envelope-like proline-rich 1
LOC100848030	1	1	1	1	1	1	1	1	1	1	1	3	17424010	17424011	uncharacterized LOC100848030
LOC100848441	1	1	1	1	1	1	1	1	1	1	1	3	17428161	17433423	uncharacterized LOC100848441
LOC100300593	1	1	1	1	1	1	1	1	1	1	1	3	17434112	17434388	uncharacterized LOC100300593
LOC100848041	1	1	1	1	1	1	1	1	1	1	1	3	17444000	17444001	uncharacterized LOC100848041
LOC100848051	1	1	1	1	1	1	1	1	1	1	1	3	17455199	17455200	uncharacterized LOC100848051
LOC100848464	1	1	1	1	1	1	1	1	1	1	1	3	17458670	17460106	uncharacterized LOC100848464
LOC100297713	1	1	1	1	1	1	1	1	1	1	1	3	17495311	17495584	uncharacterized LOC100297713
LOC100848091	1	1	1	1	1	1	1	1	1	1	1	3	17535508	17535509	uncharacterized LOC100848091
LOC100301420	1	1	1	1	1	1	1	1	1	1	1	3	17552816	17557748	uncharacterized LOC100301420
LOC100848785	1	1	1	1	1	1	1	1	1	1	1	3	17611695	17611696	uncharacterized LOC100848785
LOC100848804	1	1	1	1	1	1	1	1	1	1	1	3	17620373	17620374	uncharacterized LOC100848804
LOC100848825	1	44.0786	1	1	1	1	13.2601	1	1	1	1	3	17704131	17705020	uncharacterized LOC100848825
LOC100848603	1	1	1	1	1	1	2.22601	1	1	1	13.7102	3	17723157	17723158	uncharacterized LOC100848603
LOC100848624	1	10.9412	1	2.12784	1	1	2.22601	1	1	2.75761	1	3	17743054	17743055	small proline-rich protein 2E-like
LOC100848634	1	1	1	1	1	5.32945	1	2.08793	1	1	1	3	17754474	17754475	uncharacterized LOC100848634
LOC100848648	1	1	1	1	1	1	1	1	1	1	1	3	17764289	17764290	small proline-rich protein 2E-like
SPRR3	1	1	1	4.38353	1	1.9621	3.45202	1	1	1.8788	1	3	17774480	17774801	small proline-rich protein 3
SPRR4	1	1	1	1	1	1	1	1	1	1	1	3	17814057	17814285	small proline-rich protein 4
IVL	1	1	1	1	1	1	1	1	1	1	1	3	17883300	17884611	involucrin
SMCP	1	1	1	1	1	1	1	1	1	1	1	3	17907896	17908208	sperm mitochondria-associated cysteine-rich protein
LOC786364	1	1	1	1	1	1	1	1	1	1	1	3	17928537	17928846	uncharacterized LOC786364
LCE1B	1	1	1	1	1	1	1	1	1	1	1	3	17967033	17967345	late cornified envelope 1B
LOC100295232	1	1	1	1	1	1	1	1	1	1	1	3	18024956	18025268	uncharacterized LOC100295232
KPRP	1	1	1	1	1	1	1	1	1	1	1	3	18061245	18062976	keratinocyte proline-rich protein
LOC100139483	1	1	1	1	1	1	1	1	1	1	1	3	18108306	18109095	skin-specific protein 32-like
LOC786044	1	1	1	1	1	1	1	1	1	1	1	3	18161074	18161338	uncharacterized LOC786044
LOC786014	1	1	1	1	1	1	1	1	1	1	1	3	18184609	18184873	uncharacterized LOC786014
CRCT1	1	1	1	1	1	4.8484	1	1	8.56838	1.8788	9.79936	3	18223312	18223654	cysteine-rich C-terminal 1
CRNN	1	1	1	1	1	1	1	1	1	1	1	3	18321777	18325284	cornulin
FLG	10.0579	2.10458	1	11.1506	1	4.36735	1	1	1	1	1	3	18443881	18449419	filaggrin
LOC100848899	1	1	1	1	1	1	2.22601	1	1	1	1	3	18484777	18485566	uncharacterized LOC100848899
RPTN	1	1	1	1	1	1	1	1	9.40931	1	1	3	18623658	18628095	repetin
TCHH	2.81158	3.20916	1	12.2784	3.83295	31.7872	4.67802	7.52759	5.20465	15.9397	36.6863	3	18662776	18668606	trichohyalin
TCHHL1	17.3042	1	1	2.12784	1	8.6968	1	9.70345	1	1	1	3	18686514	18689845	trichohyalin-like 1
S100A11	1	5.41832	20.542	2.12784	3.83295	13.5073	1	35.8138	18.6595	15.0609	6.86624	3	18768798	18770108	S100 calcium binding protein A11
S100A10	435.779	484.806	555.692	219.802	134.149	502.735	399.453	571.076	627.494	285.733	371.551	3	18806647	18810298	S100 calcium binding protein A10
MIR2412	1	1	1	1	1	1	1	1	1	1	1	3	18845913	18845914	microRNA mir-2412
THEM4	1	1	2.50323	19.0455	4.77727	5.32945	1	7.52759	1	7.15163	1	3	18881359	18930014	thioesterase superfamily member 4
THEM5	1	1	1	1	1	1	1	1	1	1	1	3	18960784	18970566	thioesterase superfamily member 5
C2CD4D	1	1	1	1	1	1	1	1	1	1	1	3	18983856	18984897	C2 calcium-dependent domain containing 4D
RORC	1	1	1	2.12784	1	1	1	1	1	1	1	3	18991972	19015737	RAR-related orphan receptor C
LINGO4	1	1	1	1	1	1	1	1	1	1	1	3	19020311	19022096	leucine rich repeat and Ig domain containing 4
TDRKH	44.4779	40.7649	28.0581	12.2784	16.1091	15.4315	42.6843	10.7914	14.4549	23.8489	22.5096	3	19045266	19048395	tudor and KH domain containing
OAZ3	1	1	1	1	1	1	2.22601	1	1	1	1	3	19054164	19057091	ornithine decarboxylase antizyme 3
MRPL9	216.578	193.197	175.375	369.805	338.122	485.898	285.434	306.709	456.785	366.583	437.546	3	19060376	19066923	mitochondrial ribosomal protein L9
RIIAD1	1	1	4.00646	1	1	1.9621	1	1	1	1	1	3	19091645	19098216	regulatory subunit of type II PKA R-subunit (RIIa) domain containing 1
CELF3	1	1	1	5.51137	1.94432	1	2.22601	8.61552	11.0912	7.15163	12.7325	3	19105488	19117118	CUGBP, Elav-like family member 3
SNX27	385.055	477.074	470.008	443.114	449.551	500.811	341.83	527.559	609.834	512.464	438.524	3	19129003	19204503	sorting nexin family member 27
LOC100848992	1	1	1	1	1	1	1	1	1	1	1	3	19204838	19214356	uncharacterized LOC100848992
TUFT1	999.18	525.675	1592.92	666.427	603.475	1562.49	840.815	1369.62	1262.4	667.134	1009.5	3	19239725	19289250	tuftelin 1
CGN	481.068	357.779	459.485	190.478	250.3	622.997	276.852	643.968	508.081	312.975	409.193	3	19292039	19309322	cingulin
LOC100847624	1	1	1	1	1	1	1	1	1	1	1	3	19347213	19356430	uncharacterized LOC100847624
POGZ	1348.81	1294.46	1355.41	1455.92	1530.8	1500.43	1306.7	1481.67	1661	1638.21	2152.93	3	19379948	19408782	pogo transposable element with ZNF domain
PSMB4	53.5358	47.3923	88.1873	40.4745	85.0443	70.2712	67.2044	95.65	57.3424	62.5163	140.323	3	19412350	19414573	proteasome (prosome, macropain) subunit, beta type, 4
SELENBP1	1	1	1	11.1506	1	9.6589	1	1	3.52279	1	1	3	19484772	19493217	selenium binding protein 1
RFX5	42.6663	46.2877	40.084	32.5796	19.8864	71.2333	83.1425	101.09	83.4112	42.3038	21.5318	3	19506614	19510571	regulatory factor X, 5 (influences HLA class II expression)
PI4KB	216.578	281.563	217.465	343.864	340.955	350.242	340.604	254.488	318.872	268.156	317.777	3	19531403	19551024	phosphatidylinositol 4-kinase, catalytic, beta
ZNF687	82.5211	90.4709	89.6906	135.213	167.2	102.983	143.217	90.2104	169.186	238.277	258.137	3	19552535	19557450	zinc finger protein 687
PSMD4	622.372	362.197	454.975	429.58	648.802	929.426	719.441	658.111	906.683	635.497	795.387	3	19598538	19607489	proteasome (prosome, macropain) 26S subunit, non-ATPase, 4
PIP5K1A	1580.7	1317.66	1552.33	1237.12	1073.75	1674.09	1344.7	1210.78	1285.1	1239.24	1299.88	3	19615619	19652747	phosphatidylinositol-4-phosphate 5-kinase, type I, alpha
VPS72	97.0137	100.412	116.749	81.0769	100.153	160.709	146.895	254.488	215.437	230.368	168.677	3	19666849	19678437	vacuolar protein sorting 72 homolog (S. cerevisiae)
TMOD4	1	2.10458	1	4.38353	11.3875	1.48105	1	2.08793	1	1	1	3	19680417	19683741	tropomodulin 4 (muscle)
SCNM1	278.172	128.027	125.768	301.006	425.943	391.131	333.248	180.509	460.148	349.885	572.47	3	19684409	19686842	sodium channel modifier 1
LYSMD1	40.8547	37.4511	53.613	57.3922	41.6057	47.6618	21.8421	18.4069	46.4103	37.9098	14.199	3	19687747	19694772	LysM, putative peptidoglycan-binding, domain containing 1
TNFAIP8L2	1	3.20916	1	1	1	1	1	1	1	1	1	3	19696398	19696953	tumor necrosis factor, alpha-induced protein 8-like 2
SEMA6C	1	2.10458	7.01292	2.12784	1	1	2.22601	16.231	3.52279	1.8788	1.48885	3	19719536	19728131	sema domain, transmembrane domain (TM), and cytoplasmic domain, (semaphorin) 6C
GABPB2	11.8695	20.8824	13.0258	4.38353	9.49886	5.32945	2.22601	23.8466	1	3.63641	1.97771	3	19741111	19756049	GA binding protein transcription factor, beta subunit 2
MLLT11	6.43474	6.5229	1	7.76706	1	4.8484	3.45202	1	3.52279	1.8788	1	3	19763887	19764160	myeloid/lymphoid or mixed-lineage leukemia (trithorax homolog, Drosophila); translocated to, 11
CDC42SE1	450.272	310.282	436.937	269.427	92.5989	278.566	378.61	130.464	188.528	200.489	88.0159	3	19772302	19773909	CDC42 small effector 1
C3H1orf56	1	1	1	1	1	1	1	1	1	1	1	3	19777079	19779144	chromosome 3 open reading frame, human C1orf56
BNIPL	2.81158	1	1	1	1	1.48105	2.22601	1	1	1	1	3	19779999	19787571	BCL2/adenovirus E1B 19kD interacting protein like
PRUNE	392.301	259.471	310.665	273.938	215.36	248.741	309.954	47.7811	246.552	155.67	201.919	3	19789635	19806626	prune homolog (Drosophila)
FAM63A	397.736	480.387	668.434	502.89	500.544	506.583	607.874	639.616	417.261	406.129	451.234	3	19811292	19817292	family with sequence similarity 63, member A
ANXA9	1	1	1	1	1	1	1	1	1	1	1	3	19819023	19827473	annexin A9
CERS2	193.027	295.923	255.046	258.148	242.745	207.37	197.161	208.795	195.255	137.215	306.533	3	19839783	19842780	ceramide synthase 2
SETDB1	1185.77	1503.23	1090.84	949.516	1167.23	1179.57	1462.4	738.618	1572.7	1301.63	1056.43	3	19844270	19874896	SET domain, bifurcated 1
ARNT	513.677	563.231	686.473	469.055	518.486	620.111	514.697	357.842	718.314	440.402	553.404	3	19956085	19991725	aryl hydrocarbon receptor nuclear translocator
CTSK	35.42	24.1962	13.0258	48.3694	36.8841	19.2799	7.13004	52.1328	10.2502	15.0609	6.86624	3	19995113	20007283	cathepsin K
CTSS	1	1	2.50323	1	1	1	1	7.52759	1.84093	1	1	3	20025307	20046605	cathepsin S
HORMAD1	1	6.5229	4.00646	7.76706	14.2204	4.36735	2.22601	8.61552	8.56838	1.8788	3.93312	3	20060642	20078407	HORMA domain containing 1
GOLPH3L	127.811	111.458	116.749	84.4604	23.6636	47.1808	53.7183	91.2983	91.8205	36.1522	74.8169	3	20082074	20125932	golgi phosphoprotein 3-like
ENSA	316.215	238.485	274.588	138.597	156.812	191.977	172.641	92.3863	174.232	124.033	94.371	3	20141821	20147754	endosulfine alpha
MCL1	7511.81	5677.43	8340.92	8904.19	8116.47	10768.8	9745.31	10274.3	10344.5	12821.9	10226.3	3	20172383	20174318	myeloid cell leukemia sequence 1 (BCL2-related)
ADAMTSL4	144.115	231.857	109.233	93.4831	167.2	189.09	111.341	21.6707	123.776	80.9712	96.3264	3	20187765	20195336	ADAMTS-like 4
ECM1	133.245	134.654	64.1356	153.259	272.019	125.111	37.7802	92.3863	75.0019	11.5457	37.664	3	20228618	20233837	extracellular matrix protein 1
TARS2	97.0137	115.876	79.1679	102.506	121.873	77.0059	118.697	44.5173	100.23	124.911	103.659	3	20234763	20246064	threonyl-tRNA synthetase 2, mitochondrial (putative)
RPRD2	607.879	858.153	432.427	748.76	555.315	496	405.583	528.647	384.464	441.281	445.368	3	20254978	20345588	regulation of nuclear pre-mRNA domain containing 2
PRPF3	1674.9	831.643	991.628	1141.25	1088.85	837.546	1258.88	900.719	1820.77	1666.33	1503.74	3	20355777	20371848	PRP3 pre-mRNA processing factor 3 homolog (S. cerevisiae)
MRPS21	46.2895	77.216	47.6001	50.6251	24.608	41.4082	36.5542	53.2207	39.6828	32.6369	61.129	3	20383332	20394154	mitochondrial ribosomal protein S21
C3H1orf51	1	1	1	11.1506	15.1648	1	3.45202	2.08793	22.0233	1	1	3	20400968	20403632	chromosome 3 open reading frame, human C1orf51
C3H1orf54	6.43474	1	1	1	1	1	1	1	1	1	1	3	20407373	20413525	chromosome 3 open reading frame, human C1orf54
APH1A	203.897	469.342	492.556	311.157	236.135	484.455	376.158	403.535	302.894	152.154	307.511	3	20416083	20418581	anterior pharynx defective 1 homolog A (C. elegans)
CA14	1	2.10458	1	2.12784	4.77727	1	2.22601	1	1	1	1	3	20420439	20426372	carbonic anhydrase XIV
ANP32E	1066.21	806.238	775.163	494.995	314.514	449.338	427.651	808.245	339.054	228.61	281.113	3	20453448	20464899	acidic (leucine-rich) nuclear phosphoprotein 32 family, member E
PLEKHO1	452.083	278.249	373.801	395.745	386.282	932.794	493.855	2188.83	730.087	325.279	231.25	3	20519815	20528681	pleckstrin homology domain containing, family O member 1
VPS45	68.0284	75.0068	148.316	67.5427	114.318	75.5627	100.307	120.672	62.3879	50.213	31.7978	3	20534941	20600663	vacuolar protein sorting 45 homolog (S. cerevisiae)
LOC100847236	2.81158	1	1	3.25569	1	1	2.22601	2.08793	1	1	1	3	20601743	20603724	uncharacterized LOC100847236
OTUD7B	395.924	287.086	433.93	332.586	324.901	401.715	323.44	237.081	288.598	176.761	106.592	3	20689798	20712080	OTU domain containing 7B
MTMR11	370.562	299.236	258.052	284.089	200.251	345.913	251.106	532.999	472.762	392.068	160.366	3	20718914	20726222	myotubularin related protein 11
SF3B4	1115.12	1121.04	770.654	735.226	774.397	1044.4	1051.69	787.575	926.024	968.563	1158.12	3	20727609	20731057	splicing factor 3b, subunit 4, 49kDa
SV2A	1	1	1	2.12784	1.94432	7.25365	1	1	1	1	1	3	20746442	20754780	synaptic vesicle glycoprotein 2A
HIST2H2AC	4.62316	1	2.50323	5.51137	3.83295	1.9621	3.45202	1	1	1	1	3	20752624	20771015	histone cluster 2, H2ac
BOLA1	140.492	92.6801	62.6324	136.341	89.7659	83.2595	73.3345	237.081	166.663	191.701	115.881	3	20759598	20760006	bolA homolog 1 (E. coli)
HIST2H2AB	1	1	1	1	1	1	1	1	2.68186	1	1	3	20770076	20770469	histone cluster 2, H2ab
HIST2H2BE	75.2747	251.739	160.342	194.989	192.697	274.236	155.477	33.6379	177.595	26.4853	276.224	3	20771333	20771714	histone cluster 2, H2be
LOC619141	1	1	1	1	1	1	1	1	1	1	1	3	20791344	20791755	histone cluster 2, H3c-like
HIST2H2AA4	1	1	1	1	1	1	1	1	1	1	1	3	20792835	20793228	histone cluster 2, H2aa4
HIST1H2BL	1	1	1	1	1	1	1	1	1	1	1	3	20793581	20793962	histone cluster 1, H2bl
LOC541108	6.43474	1	5.50969	3.25569	3.83295	1	3.45202	2.08793	1.84093	2.75761	1.48885	3	20804247	20804640	histone cluster 2, H2aa3-like
LOC788077	1	1	1	1	1	1	1	1	1	1	1	3	20805720	20806131	histone cluster 2, H3c-like
LOC516742	1	1	1	1	1	1	1	1	1	1	1	3	20813188	20813500	histone cluster 1, H4i-like
LOC504599	1	1	1	1	1	1	1	1	1	1	1	3	20823727	20824138	histone H3.2
HIST2H2BF	57.1589	6.5229	52.1098	30.3239	9.49886	18.7988	13.2601	17.319	101.912	29.1217	1.48885	3	20825239	20825620	histone cluster 2, H2bf
FCGR1A	1	1	1	1	1	1	1	1	1	1	1	3	20848338	20856901	Fc fragment of IgG, high affinity Ia, receptor (CD64)
LOC788142	11.8695	21.987	13.0258	51.7529	1	69.3091	78.2385	1	14.4549	53.7283	8.3328	3	20886753	20901530	phosphodiesterase 4D interacting protein-like
MGC134040	1	1	1	1	1	1	1	1	1	1	1	3	20965389	20974994	uncharacterized protein MGC134040
LOC614643	1	3.20916	1	1	1	1	1	1	1.84093	1	3.44427	3	21112564	21112565	ribosomal protein L23a pseudogene
HFE2	1	1	1	1	1	1	1	1	1	1	1.48885	3	21472251	21474444	hemochromatosis type 2 (juvenile)
TXNIP	8.24632	10.9412	2.50323	16.7898	7.61023	11.1021	9.58206	1	1	8.03043	28.8646	3	21489343	21491817	thioredoxin interacting protein
POLR3GL	837.949	616.251	357.265	868.311	472.215	823.114	518.375	1170.53	876.409	987.018	713.748	3	21504175	21507418	polymerase (RNA) III (DNA directed) polypeptide G (32kD)-like
ANKRD34A	2.81158	1	1	14.5341	1	3.40525	5.90403	2.08793	17.8186	1.8788	7.35509	3	21519978	21521463	ankyrin repeat domain 34A
LIX1L	1	1	1	1	1	2.44315	1	1	1	3.63641	4.91083	3	21523815	21548067	Lix1 homolog (mouse)-like
RBM8A	153.173	259.471	280.601	155.514	123.761	143.391	159.155	158.75	134.708	164.458	221.473	3	21553449	21555228	RNA binding motif protein 8A
LOC789231	17.3042	18.6733	40.084	11.1506	15.1648	1.9621	5.90403	2.08793	11.0912	1.8788	4.42197	3	21560637	21560638	uncharacterized LOC789231
PEX11B	555.343	556.603	524.124	604.396	515.653	320.898	902.116	425.293	774.656	815.651	906.356	3	21561006	21565771	peroxisomal biogenesis factor 11 beta
ITGA10	71.6516	133.549	73.155	91.2275	119.04	97.21	116.245	148.959	230.574	145.124	100.237	3	21567425	21582886	integrin, alpha 10
ANKRD35	1	1	2.50323	2.12784	1	1	1	1	1	5.39402	1	3	21588493	21604306	ankyrin repeat domain 35
PIAS3	78.8979	109.249	101.716	137.469	151.147	87.589	102.759	53.2207	101.071	81.85	71.8837	3	21612765	21621180	protein inhibitor of activated STAT, 3
NUDT17	10.0579	6.5229	8.51615	14.5341	17.9977	20.242	20.6161	15.1431	20.3414	2.75761	13.2213	3	21619852	21624594	nudix (nucleoside diphosphate linked moiety X)-type motif 17
POLR3C	162.231	181.046	170.865	308.901	185.142	182.837	258.462	338.259	406.329	329.673	361.774	3	21626729	21638497	polymerase (RNA) III (DNA directed) polypeptide C (62kD)
RNF115	336.142	234.066	237.007	171.304	257.855	308.391	253.558	240.345	181.8	301.551	298.223	3	21639997	21705121	ring finger protein 115
PDZK1	6.43474	20.8824	26.5549	5.51137	1.94432	2.44315	7.13004	61.9242	5.20465	18.5761	2.46656	3	21777422	21800794	PDZ domain containing 1
GPR89	42.6663	30.8236	68.6453	33.7075	32.1625	34.6735	14.4861	17.319	40.5237	67.7891	51.8407	3	21802388	21847634	G protein-coupled receptor 89
GJA8	1	1	1	1	1	1	1	1	1	1	1	3	21859234	21860557	gap junction protein, alpha 8, 50kDa
GJA5	26.3621	12.0458	1	1	6.66591	47.6618	16.9381	1	6.88652	8.90924	1.48885	3	21997274	21998354	gap junction protein, alpha 5, 40kDa
ACP6	98.8253	115.876	131.781	175.816	87.8773	73.6385	78.2385	287.126	146.481	190.822	131.035	3	22064634	22085021	acid phosphatase 6, lysophosphatidic
BCL9	343.388	413.008	618.827	480.333	182.309	424.805	452.171	722.299	153.208	247.065	129.08	3	22106733	22120873	B-cell CLL/lymphoma 9
LOC788749	1	1	1	1	1	1	1	1	1	1	1	3	22310517	22311483	olfactory receptor, family 5, subfamily V, member 1-like
LOC530153	1	1	1	1	1	1	1	1	1	1	1	3	22348890	22349835	olfactory receptor, family 5, subfamily V, member 1-like
LOC618307	1	1	1	1	1	1	1	1	1	1	1	3	22356922	22442578	Histone H3-like centromeric protein A-like
CHD1L	665.849	579.799	994.635	1118.69	994.423	844.761	875.144	737.53	681.313	645.164	545.583	3	22487162	22551382	chromodomain helicase DNA binding protein 1-like
FMO5	26.3621	21.987	20.542	52.8808	51.0489	43.3324	39.0063	72.8035	18.6595	51.0918	5.88853	3	22572472	22613136	flavin containing monooxygenase 5
LOC788724	1	1	1	1	1	1	1	1	1	1	1	3	22584829	22585222	histone cluster 2, H2aa3-like
PRKAB2	232.882	168.896	316.678	148.747	410.834	315.126	231.49	382.864	397.078	366.583	345.642	3	22635120	22646401	protein kinase, AMP-activated, beta 2 non-catalytic subunit
LOC616149	10.0579	1	1	12.2784	1	1	1	1	1	1	1.97771	3	22676254	22790539	neuroblastoma breakpoint family member 4-like
[truncated: 18,213 more rows]
