# Supplementary material for: Transcriptomic Features of Bovine Blastocysts Derived by Somatic Cell Nuclear Transfer
Source: G3 (Bethesda). 2015 Sep 3;5(12):2527–38. doi: 10.1534/g3.115.020016 (PMC4683625; doi:10.1534/g3.115.020016)
Supplement: Supporting Information [file supp_g3.115.020016_FileS2.xlsx]

## Sheet: PG
geneSymbol	IVF1	IVF2	IVF3	cSCNT1	cSCNT2	cSCNT3	cSCNT4	fSCNT1	fSCNT2	fSCNT3	fSCNT4
CHST4	1	1	1	1	1	1	1	8.61552	1	1	1
CRABP1	1	1	1	1	1	1	1	1	1	1	1
FGF4	1	1	1	1	1	1	1	1	1	1	1
FOXD3	1	1	1	1	1	1	1	1	1	3.63641	1
FST	1	1	1	1	1	1	1	1	1	1	1
GBX2	1	1	1	1	1	1	1	1	1.84093	1	1
IFITM1	1	1	1	1	1	1	1	1	1	1	1
IFITM2	1	1	1	1	1	1	1	1	1	1	1
ITGB1BP3	1	1	1	1	1	1	1	1	1	1	1
LEFTY2	1	1	1	1	1	1	1	1	1	1	1
NODAL	1	1	1	1	1	1	1	7.52759	1	1	1
NOG	1	1	1	1	1	1	1	1	1	1	1
NTS	1	1	1	1	1	1	1	1	1	1	1
SCGB3A2	1	1	1	1	1	1	1	1	1	1	1
SFRP2	1	1	1	1	1	1	1	1	1	1	1
WNT1	1	1	1	1	1	1	1	1	1	1	1
EPHA4	20.9274	17.5687	19.0388	6.63922	1.94432	3.40525	4.67802	35.8138	22.0233	1	8.3328
DIAPH2	6.43474	1	2.50323	24.6847	25.5523	22.6472	18.1641	4.26379	15.2958	15.0609	11.2659
DPPA2	216.578	165.582	223.478	350.631	306.015	265.577	237.62	206.619	422.306	443.039	197.519
TTF1	303.534	255.053	259.555	340.481	428.776	307.91	357.768	346.962	284.394	308.581	333.42
ZFX	2818.01	1211.62	1463.64	3367.61	2406.18	3185.07	3411.75	3251.74	1750.98	2511.74	2332.34
LECT1	1	1	1	4.38353	3.83295	1	3.45202	1	9.40931	7.15163	5.88853
SALL2	2.81158	4.31374	8.51615	1	1	2.9242	1	1	1	1.8788	1
CD59	10.0579	12.0458	10.0194	22.429	10.4432	29.863	29.1982	46.6931	11.9321	22.0913	23.9761
CKMT1B	1743.74	1579.44	1260.71	1898.03	2326.86	1795.8	1820.4	1648.13	2102.49	1797.28	1739.36
LEF1	2.81158	1	4.00646	1	1	1	1	1	2.68186	1	1
REST	6406.74	3197.65	5499.81	3709.35	2833.95	2516.89	3742.78	3225.63	3136.83	3589.16	2676.49
CLDN6	1645.91	1899.77	2359.57	1648.78	1126.63	1283.48	1766.45	1727.55	1664.36	1962.49	2698
LCK	17.3042	14.2549	14.5291	44.9859	41.6057	92.8805	24.2941	17.319	64.9107	2.75761	17.1322
GJA1	1	1	13.0258	25.8126	18.942	27.9388	1	14.0552	15.2958	16.8185	3.93312
COMMD3	51.7242	105.935	85.1809	34.8353	67.1023	40.4461	68.4304	84.7707	53.9786	38.7886	62.5955
DPPA4	122.376	198.72	411.382	136.341	181.365	45.7376	81.9165	404.623	306.258	181.155	291.379
SMAD2	97.0137	70.5885	80.6712	60.7757	51.0489	88.5511	48.8143	44.5173	89.2977	88.8804	49.3965
WNT5A	2.81158	4.31374	1	1	1	1	2.22601	1	1	4.51522	1
KIT	4517.27	2940.28	5164.59	4218.01	2853.79	1440.78	2776.68	2022.38	1662.68	2189.22	1718.83
NANOG	4.62316	97.0984	178.381	58.52	17.9977	13.0262	2.22601	306.709	32.9554	8.03043	5.39968
STAT3	991.934	2225.62	1567.37	1370.2	1289.99	810.607	812.617	1348.95	722.519	1121.48	959.153
FGFR1	13.6811	13.1504	17.5355	109.273	17.9977	165.038	21.8421	10.7914	10.2502	25.6065	1.97771
KLF9	60.7821	35.242	14.5291	84.4604	77.4898	35.1545	46.3623	31.4621	53.9786	117.881	113.436
TFCP2L1	245.563	280.459	333.214	132.958	218.193	325.709	202.065	292.566	236.461	151.276	252.271
SMAD4	2961.12	3383.22	4506.18	3687.92	3953.92	5279.56	4381.53	4117.73	5357.73	5257.13	6080.38
TERT	1	2.10458	2.50323	1	2.88864	3.8863	4.67802	1	1	4.51522	1.48885
KLF2	1	2.10458	1	1	1	1	1	3.17586	1	1	1.48885
EPHA2	51.7242	189.883	116.749	122.807	33.1068	94.8047	51.2663	277.335	44.7284	15.9397	63.5732
EPHA1	100.637	130.236	193.413	295.367	140.759	153.012	177.545	166.366	119.571	79.2136	195.564
GABRB3	1	8.73205	1	2.12784	1	1	1	14.0552	1	1	5.88853
FZD7	28.1737	9.83663	17.5355	10.0227	14.2204	9.6589	19.3901	29.2862	9.40931	20.3337	11.2659
CDK4	232.882	184.36	582.75	213.035	273.908	204.484	216.777	304.533	168.345	240.035	425.325
KLF5	705.704	1105.58	793.202	506.274	759.288	886.613	769.707	900.719	1078.23	870.137	1140.52
EPHB4	24.5505	146.804	77.6647	191.605	34.0511	299.251	97.8546	391.567	106.116	68.6679	104.148
POU5F1	278.172	139.072	318.181	110.401	278.63	139.061	205.743	231.641	329.804	177.64	374.973
PMAIP1	22.7389	6.5229	19.0388	78.8212	1	36.1166	24.2941	1	21.1823	47.5766	15.6656
PITX2	68.0284	95.9938	50.6066	42.7302	79.3784	64.4986	40.2323	8.61552	69.9563	56.3647	86.0605
CCNE1	171.288	348.942	176.878	210.779	126.594	184.28	204.517	185.948	169.186	266.399	126.635
MCM3	526.358	801.82	743.595	523.191	859.385	341.583	493.855	687.485	515.65	573.98	458.078
TERF1	129.622	55.1244	184.394	69.7984	127.539	77.968	88.0466	129.376	118.73	164.458	113.436
KLF4	87.9558	69.4839	91.1938	95.7388	228.581	77.4869	84.3685	98.9138	173.391	241.792	259.115
HOXA11	1	1	1	1	1	1.9621	1	1	1	1	1
GAL	1	1	1	1	1	1.48105	1	1	1	1	1
FGF13	11.8695	5.41832	22.0452	15.662	5.72159	7.7347	7.13004	1	1.84093	1	1
FGFR4	370.562	380.975	506.085	249.125	442.941	415.184	362.672	588.483	209.551	312.975	530.428
PSIP1	289.041	333.478	288.117	416.046	407.057	309.834	246.202	277.335	261.689	433.372	349.064
NR5A2	1	38.5557	13.0258	4.38353	120.928	16.8746	35.3282	29.2862	4.36372	2.75761	1
GPC4	1	1	11.5226	8.8949	9.49886	10.14	1	86.9466	11.9321	7.15163	16.6433
FBXO15	29.9853	28.6145	59.626	29.1961	65.2136	21.2041	127.279	15.1431	1	3.63641	77.2611
DPPA3	12654.9	10086.9	9230.83	11018.9	11355.5	10732.7	12212	6752.7	14767.7	12766.5	12157.3
SALL4	162.231	213.079	155.833	201.756	103.931	200.636	91.7246	97.8259	102.753	136.336	106.103
PTEN	261.867	368.825	318.181	451.009	364.562	326.19	269.496	327.379	307.94	294.521	306.533
GYLTL1B	1	23.0916	32.5678	7.76706	18.942	16.8746	8.35605	3.17586	10.2502	1	5.88853
FGF2	28.1737	36.3465	17.5355	34.8353	15.1648	42.8513	39.0063	18.4069	40.5237	21.2125	23.4872
BMPR1A	582.517	483.701	835.292	564.922	829.167	743.26	672.852	708.156	665.335	777.863	743.568
SMAD5	499.184	466.028	450.466	523.191	194.585	569.12	356.542	575.428	266.734	269.914	360.796
ZNF43	6.43474	2.10458	2.50323	4.38353	9.49886	3.40525	2.22601	19.4948	19.5005	1	1
EDNRB	1	1	10.0194	12.2784	11.3875	1	1	3.17586	1	1	1
SMAD1	227.447	195.406	339.227	308.901	255.966	388.245	192.257	383.952	332.327	229.489	263.025
TGFB1	22.7389	154.536	82.1744	108.145	82.2114	236.233	42.6843	171.805	55.6605	204.004	60.1512
TOP2A	11682.1	10669	9339.06	10425.7	12180.8	7729.07	9343.18	11302.4	9215.92	11014.2	7822.65
KLF3	116.941	107.04	97.2067	121.679	193.641	76.5248	96.6286	101.09	133.867	117.881	106.103
THY1	15.4926	4.31374	4.00646	4.38353	1.94432	51.0292	2.22601	22.7586	22.8642	5.39402	1.48885
ITGB1	1265.48	943.206	1311.82	1141.25	1181.4	1343.61	1218.43	1827.64	1657.63	1235.72	1251.98
SALL1	260.056	150.118	97.2067	170.176	119.04	161.19	156.703	79.3311	32.1144	235.641	15.1768
HMGB1	939.398	558.812	949.538	795.002	799.893	593.653	872.692	672.254	513.968	1081.93	621.844
GRB7	321.649	378.766	357.265	340.481	417.444	366.117	328.344	296.917	296.167	412.28	291.379
TDGF1	22.7389	1	1	54.0086	1	1.48105	1	221.85	1.84093	1	1
TDGF1	22.7389	1	1	54.0086	1	1.48105	1	221.85	1.84093	1	1
NUMB	66.2168	123.608	130.278	83.3325	148.314	139.542	90.4986	169.629	109.48	119.639	91.4379
UNG	174.912	136.863	131.781	114.912	248.411	91.4374	81.9165	102.178	147.322	133.699	180.898
CHD1	1307.15	2316.2	1610.96	1599.15	1510.96	2364.88	1862.08	2593.54	2062.96	2561.84	2123.6
CCNB1	1116.93	1042.62	1508.74	872.823	1939.69	867.852	916.828	452.492	957.138	838.5	1172.29
SOX2	109.695	51.8106	103.22	61.9035	117.151	110.198	42.6843	338.259	60.7061	152.154	132.99
GDF3	1	5.41832	2.50323	6.63922	4.77727	1	1	2.08793	5.20465	1	1
CCND1	1	2.10458	1	2.12784	1	1	1	1	1	1	1
ITGA6	69.84	97.0984	121.258	120.551	83.1557	109.717	61.0744	136.991	116.208	97.6685	123.213
TCF3	51.7242	70.5885	103.22	92.3553	37.8284	102.502	59.8484	77.1552	33.7963	65.1527	79.2165
MSH2	953.891	1121.04	857.841	1380.35	1112.46	548.435	938.896	738.618	710.746	755.014	593.001
SMAD3	29.9853	31.9282	31.0646	19.0455	28.3852	51.0292	27.9722	35.8138	30.4326	27.3641	41.5748
NR6A1	158.607	192.092	202.433	156.642	100.153	265.096	206.969	225.114	149.845	226.853	88.5048
NR6A1	158.607	192.092	202.433	156.642	100.153	265.096	206.969	225.114	149.845	226.853	88.5048
PODXL	24.5505	28.6145	23.5484	28.0682	23.6636	18.3178	31.6502	31.4621	31.2735	74.8196	25.4427
BYSL	142.303	154.536	100.213	122.807	136.982	112.123	160.381	84.7707	159.095	152.154	257.159

## Sheet: TEG
geneSymbol	IVF1	IVF2	IVF3	cSCNT1	cSCNT2	cSCNT3	cSCNT4	fSCNT1	fSCNT2	fSCNT3	fSCNT4
ABCG2	11.8695	9.83663	7.01292	38.2188	4.77727	25.5335	5.90403	55.3966	1	1	3.93312
ADPRHL2	33.6084	13.1504	76.1615	73.182	27.4409	62.0933	78.2385	8.61552	47.2512	30.8793	20.5541
CCKBR	20.9274	8.73205	13.0258	1	1.94432	2.9242	1	1	1	1	1
CD9	1466.57	1477.82	3078.11	1287.87	1020.86	2151.77	1294.44	3847.93	1436.47	1784.97	1611.28
CDH1	8173.03	7567.37	7094.74	6613.54	6575.34	9758.13	7147.4	6864.76	9907.17	10998.4	8236.22
CDX2	202.085	209.765	122.762	118.296	192.697	135.694	203.291	11.8793	79.2066	45.819	71.3949
CSRP2BP	89.7674	139.072	127.271	73.182	238.024	198.23	173.867	183.773	178.436	256.732	166.721
DKKL1	6.43474	12.0458	5.50969	21.3012	1.94432	64.4986	24.2941	117.409	6.88652	14.1821	69.9283
DNMT3L	1	1	1	1	1	1	1	1	1	1	1
EOMES	4.62316	1	1	1	1	1	1	2.08793	1	1	1
EPCAM	718.385	827.225	754.118	587.478	282.407	415.184	476.691	740.794	494.626	703.165	561.226
ESRRB	433.967	441.727	396.349	348.376	289.961	210.257	350.412	171.805	438.284	345.491	417.992
FGFR2	28.1737	51.8106	52.1098	55.1365	85.0443	44.7755	27.9722	229.466	25.387	11.5457	16.1545
FZD5	28.1737	20.8824	13.0258	8.8949	11.3875	9.17785	14.4861	26.0224	8.56838	29.1217	25.9315
GATA2	31.7968	26.4053	25.0517	50.6251	42.55	48.6239	10.8081	15.1431	30.4326	77.456	10.2882
GCM1	124.187	139.072	104.723	79.949	63.325	11.5831	39.0063	93.4742	53.1377	58.1223	172.588
HAND1	1	1	1	7.76706	1	1.48105	1	1	1	1	3.44427
HPDL	1	10.9412	20.542	10.0227	1.94432	5.8105	4.67802	1	1	1	1
KRT1	93.3905	27.5099	11.5226	21.3012	60.492	31.7872	64.7524	2.08793	53.1377	81.85	14.199
KRT18	19750.8	25315.7	35917.7	24854.2	27654.4	43007.8	30756.6	40642.9	20473.5	16019.8	20353.9
LAMA1	437.591	526.78	456.479	572.816	750.789	446.452	149.347	504.712	162.459	317.37	123.213
NSDHL	153.173	133.549	88.1873	97.9945	139.815	179.951	161.607	222.938	256.643	225.974	125.658
PITPNC1	8.24632	12.0458	25.0517	3.25569	11.3875	22.1662	12.0341	17.319	45.5693	13.3033	3.93312
PRELID1	414.04	415.217	558.698	354.015	332.456	304.061	302.598	597.187	326.44	317.37	477.143
PRR5	35.42	4.31374	38.5807	49.4973	94.4875	46.6997	36.5542	58.6604	27.9098	37.031	21.043
RPS21	11.8695	33.0328	28.0581	11.1506	10.4432	32.2682	16.9381	8.61552	27.9098	33.5158	81.1719
TMEM80	1	6.5229	4.00646	1	1	1	2.22601	1	1	1	1

## Sheet: DRG
geneSymbol	IVF1	IVF2	IVF3	cSCNT1	cSCNT2	cSCNT3	cSCNT4	fSCNT1	fSCNT2	fSCNT3	fSCNT4
AFP	1	1	1	1	1	1	1	1	1	1	1
BMP2	11.8695	1	1	6.63922	1.94432	13.9884	1	2.08793	1.84093	1	6.86624
BMP4	31.7968	40.7649	8.51615	70.9263	20.8307	39.0029	10.8081	15.1431	14.4549	80.0924	1
CDH2	2.81158	19.7778	13.0258	28.0682	50.1046	7.25365	1	261.016	36.3191	128.427	1.48885
CLDN6	1645.91	1899.77	2359.57	1648.78	1126.63	1283.48	1766.45	1727.55	1664.36	1962.49	2698
CTNNB1	1435.77	1551.83	1619.98	1524.72	1239	1319.08	1994.49	1594.82	1811.52	1300.75	1918.28
EOMES	4.62316	1	1	1	1	1	1	2.08793	1	1	1
FABP1	1	1	1	1	1	1	1	1	1	1	1
FABP2	1	1	1	1	1	1	1	1	1	1	1
FABP4	1	1	1	1	1	1	1	1	1	1	1
FGF5	1	1	1	1	1	1	1	1	1	1	1
FGF8	1	1	1	1	1	1	1	1	1	1	1
FOXA1	1	1	1	1	1	1	1	1	1	1	1
FOXA2	1	1	1	1	1	1	1	1	1	1	1
FOXF1	1	1	1	1	1	1	1	1	1	1	1
FOXJ3	430.344	383.184	424.911	348.376	611.03	739.412	463.205	1045.41	872.204	859.592	1039.32
GATA4	28.1737	33.0328	46.0969	29.1961	3.83295	11.5831	46.3623	5.35173	1	27.3641	13.2213
GATA6	3765.46	2114.06	2727.86	2677.37	2490.22	3879.7	3431.37	3138.59	4087.08	4572.54	3378.49
GBX2	1	1	1	1	1	1	1	1	1.84093	1	1
GDF1	1	1	1	1	1	1	1	1	1	1	1
GDF3	1	5.41832	2.50323	6.63922	4.77727	1	1	2.08793	5.20465	1	1
GSC	2.81158	1	2.50323	2.12784	1	1	2.22601	1	2.68186	9.78804	1
GSC2	1	1	1	1	1	1	1	1	1	1	1
HAND1	1	1	1	7.76706	1	1.48105	1	1	1	1	3.44427
HNF1B	68.0284	200.929	130.278	69.7984	50.1046	69.3091	12.0341	123.936	9.40931	35.2734	8.3328
HNF4A	906.789	2675.19	2078.46	1428.85	279.574	233.828	187.353	2110.5	346.623	494.888	24.9538
HP	1	1	1	3.25569	1.94432	1	1	1	1	1.8788	1
INHBA	1	1	4.00646	2.12784	1	1.48105	1	2.08793	1	5.39402	1.97771
INHBB	1	1	2.50323	1	1.94432	1	1	1	1.84093	1	1
INHBC	1	1	1	1	1	1	1	1	1	1	1
KRT19	33.6084	24.1962	121.258	23.5569	12.3318	179.951	18.1641	249.048	27.0689	10.6669	22.5096
MESDC2	265.491	384.289	274.588	308.901	204.028	131.364	226.585	429.645	218.801	128.427	259.115
MIXL1	1	1	1	4.38353	1	1	1	7.52759	1	1	1
NES	861.5	1351.9	1212.6	1120.95	426.888	1207.47	568.642	3664.07	283.553	1248.02	729.88
NODAL	1	1	1	1	1	1	1	7.52759	1	1	1
NOG	1	1	1	1	1	1	1	1	1	1	1
OTX2	1513.67	1594.91	1537.3	1557.42	1255.05	1345.53	1256.43	1264.09	1211.1	1241.87	1554.09
PAX2	1	1	1	1	1	1	1	1	1	1	1
PAX6	1	1	1	7.76706	1	3.40525	3.45202	4.26379	1	1	1
SALL4	162.231	213.079	155.833	201.756	103.931	200.636	91.7246	97.8259	102.753	136.336	106.103
SOX1	1	1	1	1	1	1	1	1	1	1	1
SOX17	1	1	1	1	1	1	1	1	1	1	1
SOX7	1	1	1	1	1	1.48105	1	1	1	1	1
T	1	1	1	1	1	1	1	1	1	1	1
TAB1	42.6663	46.2877	47.6001	17.9176	66.158	63.5365	41.4583	16.231	22.0233	43.1826	25.9315
TBX6	19.1158	18.6733	14.5291	23.5569	62.3807	10.14	24.2941	2.08793	57.3424	30.8793	30.3312
TF	1	1	1	1	1	1	1	1	3.52279	1	1
TUBB3	627.806	324.642	316.678	1289	1608.23	1193.04	1718.64	542.79	1279.21	1431.69	1457.78
TWIST1	1	7.62747	1	3.25569	1	1	1	1	1	1	1
TWIST2	1	1	1	1	1	1	1	1	1	1	1
WNT3A	1	1	1	8.8949	1	2.9242	1	1	1	1	1
WNT8A	1	1	1	1	1	1.48105	1	1	1	1	1

## Sheet: EMG
geneSymbol	IVF1	IVF2	IVF3	cSCNT1	cSCNT2	cSCNT3	cSCNT4	fSCNT1	fSCNT2	fSCNT3	fSCNT4
APOBEC1	8.24632	9.83663	10.0194	1	1	14.4694	9.58206	2.08793	11.0912	1	1
APOBEC2	1	1	7.01292	4.38353	7.61023	14.4694	1	8.61552	1	11.5457	4.42197
APOBEC3A	1	1	1	1	1	1	1	1	1	1	1
APOBEC3B	1	1	1	1	1	1	1	1	1	15.9397	1
TDG	510.054	425.158	408.375	638.231	305.07	303.58	594.388	507.976	184.323	346.37	328.532
TET2	1162.22	838.271	629.35	809.663	692.241	601.35	669.174	433.997	1102.62	684.71	748.457
TET3	124.187	95.9938	95.7035	190.478	61.4364	228.537	226.585	232.729	249.916	230.368	158.9
DNMT1	500.996	534.512	474.517	551.387	837.666	435.388	428.877	269.719	489.581	974.715	803.208
DNMT3A	6.43474	2.10458	2.50323	12.2784	3.83295	18.7988	4.67802	2.08793	3.52279	33.5158	8.3328
DNMT3L	1	1	1	1	1	1	1	1	1	1	1
ELP3	120.564	113.667	103.22	233.336	144.536	172.735	149.347	250.136	225.529	146.881	196.052
HAT1	278.172	447.25	342.233	304.39	411.778	215.548	197.161	364.369	389.51	182.912	322.666
HDAC1	12591.5	6624.06	7992.17	8807.2	6268.44	6574.06	8046.06	9758.66	6972.32	10628.4	12386.6
HDAC10	6.43474	7.62747	1	29.1961	4.77727	3.8863	2.22601	4.26379	1	4.51522	1
HDAC11	8.24632	2.10458	1	1	1	1	1	2.08793	1.84093	1	1.48885
HDAC2	263.679	453.877	411.382	312.285	464.66	281.933	313.632	459.019	318.031	435.129	231.739
HDAC3	129.622	167.791	106.226	55.1365	58.6034	47.6618	36.5542	49.9569	43.0465	66.0315	76.7723
HDAC4	13.6811	13.1504	11.5226	37.091	39.7171	28.9009	21.8421	11.8793	22.0233	13.3033	30.82
HDAC5	17.3042	42.974	43.0904	82.2047	57.6591	38.5219	29.1982	30.3742	48.9331	41.425	50.3742
HDAC6	1700.26	878.036	612.814	1437.87	2765.02	1020.34	1475.89	959.468	2073.89	1875.49	2544.99
HDAC7	91.579	86.0526	95.7035	164.537	116.207	169.849	123.601	154.398	133.867	44.0614	82.6385
HDAC8	403.171	184.36	179.884	410.407	273.908	276.16	252.332	399.183	179.277	187.306	300.178
HDAC9	8.24632	3.20916	14.5291	1	1	1.48105	1	1	1	1.8788	1
SIRT1	1125.99	1065.81	721.047	881.845	1088.85	1020.83	725.571	933.357	1229.6	1009.87	1283.75
SIRT2	171.288	294.818	206.942	250.253	298.46	293.478	244.976	327.379	247.393	305.945	317.288
SIRT3	11.8695	68.3793	7.01292	40.4745	15.1648	17.3557	30.4242	3.17586	3.52279	9.78804	37.1752
SIRT4	28.1737	37.4511	29.5614	44.9859	61.4364	40.9271	73.3345	20.5828	15.2958	79.2136	12.2436
SIRT5	8.24632	7.62747	13.0258	3.25569	17.9977	12.5452	2.22601	15.1431	6.04559	20.3337	32.2866
SIRT6	15.4926	26.4053	5.50969	16.7898	22.7193	34.1924	35.3282	19.4948	8.56838	13.3033	47.4411
SIRT7	39.0432	30.8236	23.5484	26.9404	55.7705	18.7988	45.1363	6.43966	60.7061	37.9098	34.242
JHDM1D	165.854	128.027	128.775	190.478	98.2648	170.811	150.573	71.7155	157.413	211.034	194.586
JMJD1C	1662.22	1542.99	1338.87	1381.48	1070.91	1154.56	1377.81	2378.13	1364.99	1339.42	1417.21
JMJD4	8.24632	28.6145	34.071	30.3239	34.0511	7.7347	18.1641	8.61552	41.3647	5.39402	32.2866
JMJD5	13.6811	9.83663	5.50969	11.1506	5.72159	10.621	3.45202	1	1.84093	1	1
JMJD6	178.535	186.569	215.962	363.038	354.175	294.44	270.722	243.609	281.871	274.308	422.392
JMJD7	11.8695	14.2549	25.0517	22.429	4.77727	11.5831	18.1641	3.17586	6.88652	22.9701	53.7962
JMJD8	20.9274	45.1832	40.084	25.8126	23.6636	19.7609	52.4923	26.0224	38.001	14.1821	19.0876
KDM1B	51.7242	29.7191	31.0646	78.8212	63.325	74.1196	101.533	115.233	47.2512	54.6071	21.043
KDM2A	4100.6	4674.47	3138.24	3155.58	3333.5	4256.37	3595.66	2594.63	4288.91	6075.29	3290.49
KDM2B	1263.67	1419.28	1774.81	1248.39	1107.74	509.47	690.016	2322.65	1109.35	935.169	927.866
KDM3A	964.76	1410.44	1396	1082.6	1312.66	1331.1	1463.63	1544.77	2081.46	2313.13	1801.45
KDM4A	2321.63	2008.02	1365.93	2619.85	2833.01	1862.66	2077.86	995.37	2182.37	1952.82	1931.48
KDM4B	98.8253	141.282	118.252	86.7161	117.151	187.647	90.4986	53.2207	77.5247	109.093	39.1306
KDM4C	82.5211	121.399	146.813	105.889	183.253	128.478	108.889	199.004	238.983	299.793	132.013
KDM4D	11.8695	1	1	26.9404	10.4432	24.5714	1	1	1	1	1
KDM5A	1408.6	1168.54	727.06	884.101	1043.53	1345.53	1001.42	906.159	1088.32	1226.05	615.977
KDM5B	2828.87	4329.85	3607.25	3263.85	2831.12	4882.21	3211.92	2702.33	2956.87	2983.66	2341.14
KDM5C	953.891	839.376	603.795	1202.15	1300.38	1333.51	1171.84	1028.01	1350.69	1488.82	1458.27
KDM6A	1308.96	616.251	608.305	1080.35	1648.84	1278.67	888.63	1548.04	1800.59	1879.88	2072.27
KDM6B	220.201	325.746	265.568	312.285	259.743	216.991	268.27	417.678	181.8	170.609	242.982
CARM1	408.605	790.774	600.789	523.191	984.98	797.619	854.302	651.583	1181.67	1138.17	1500.8
EZH1	187.593	245.112	190.407	126.191	86.933	141.948	143.217	221.85	207.028	207.519	298.223
EZH2	1537.22	1451.31	1567.37	1646.52	1938.74	1780.88	1372.9	1717.76	2340.47	2529.32	2314.74
MLL	3216.55	4381.76	2150.62	3568.37	2713.08	3438.1	3237.66	3914.29	4363.75	4302.75	4635.33
MLL2	1443.02	1951.69	1218.62	1691.64	1906.63	1571.15	1600.94	1499.08	1214.46	1694.46	1856.2
MLL5	1285.41	1326.49	893.918	1291.25	1812.2	1279.15	1201.26	725.562	1681.18	1289.33	1520.36
PRMT1	1602.44	1380.62	2113.04	1442.38	1916.08	2127.72	2180.84	1589.38	1220.35	2457.26	2150
PRMT10	160.419	118.085	53.613	164.537	69.9352	67.3849	48.8143	175.069	134.708	188.185	110.014
PRMT2	29.9853	54.0198	44.5937	32.5796	110.541	42.3703	32.8762	90.2104	60.7061	89.7592	35.2197
PRMT3	178.535	184.36	146.813	214.162	221.026	165.519	175.093	255.576	267.575	352.522	280.624
PRMT5	702.081	448.355	581.247	861.544	835.777	653.785	1016.13	815.861	978.162	1072.26	1067.68
PRMT6	13.6811	14.2549	2.50323	8.8949	8.55455	1.48105	15.7121	24.9345	9.40931	9.78804	34.242
PRMT7	153.173	258.367	285.11	104.762	182.309	70.2712	179.997	134.816	144.799	167.973	154.5
PRMT8	1	1	1	1	1	1	1	1	1	1	1
RBBP4	1459.32	1550.72	1556.84	1558.55	2181.43	1468.68	1600.94	2501.07	2384.2	1985.34	1247.58
RBBP5	847.007	1235.92	1218.62	1251.78	1333.43	925.097	1386.39	1403.34	910.046	999.322	1121.94
RBBP6	2421.27	2490.72	1389.98	2359.32	2064.34	2080.1	1607.07	1601.35	1682.02	1535.39	1986.23
RBBP7	2227.43	1098.95	1347.89	1066.81	1056.75	1580.77	1206.17	1702.53	1661	1717.3	1327.75
RBBP8	1667.65	1578.34	1896.57	2126.98	2628.09	1960.32	2362.29	2124.64	2018.39	1977.43	2407.14
RBBP9	35.42	48.4969	118.252	69.7984	45.383	18.7988	25.5202	16.231	58.1833	27.3641	14.6879
SETD1A	660.415	570.963	457.982	665.3	739.457	724.018	547.8	752.761	824.271	1257.69	1069.14
SETD1B	352.446	510.211	292.627	548.004	517.542	392.575	313.632	254.488	438.284	372.734	303.111
SETD2	5285.38	5537.15	4043.18	4379.29	4195.66	4562.8	4413.4	4777.02	6400.48	7872.45	5987.5
SETD3	428.533	362.197	343.736	402.512	478.825	371.408	349.186	230.554	364.282	246.186	236.627
SETD4	147.738	128.027	88.1873	125.063	142.648	150.607	213.099	102.178	168.345	108.214	120.769
SETD5	5140.45	6794.16	4164.95	4851.85	4188.11	4804.76	4423.21	5959.6	4947.36	5868.78	4457.88
SETD6	19.1158	15.3595	20.542	11.1506	36.8841	17.8367	3.45202	11.8793	16.9777	19.4549	25.9315
SETD7	149.549	172.21	170.865	137.469	165.311	180.432	68.4304	272.983	176.755	226.853	270.358
SETD8	113.318	164.478	94.2002	70.9263	126.594	124.149	77.0125	116.321	156.572	129.305	125.169
SETDB1	1185.77	1503.23	1090.84	949.516	1167.23	1179.57	1462.4	738.618	1572.7	1301.63	1056.43
SETDB2	332.519	304.759	176.878	262.66	172.866	140.023	276.852	192.476	273.462	182.034	231.739
SUV39H1	136.868	33.0328	43.0904	63.0314	90.7102	139.542	77.0125	84.7707	47.2512	84.4864	27.8869
SUV39H2	4.62316	28.6145	44.5937	39.3467	21.775	34.6735	37.7802	46.6931	8.56838	16.8185	6.86624
SUV420H1	531.793	339.001	470.008	447.626	272.019	278.085	372.48	392.655	398.76	444.796	369.107
SUV420H2	28.1737	49.6015	44.5937	97.9945	45.383	9.6589	35.3282	54.3087	21.1823	32.6369	43.0414
BMI1	158.607	154.536	97.2067	132.958	132.26	99.6152	89.2726	34.7259	106.957	102.062	165.744
EED	160.419	249.53	402.362	320.18	243.69	483.974	231.49	311.061	255.802	344.612	472.255
PRC1	935.775	829.434	657.911	641.615	653.524	740.855	564.964	422.03	585.447	695.255	697.127
SUZ12	1419.47	1893.14	1256.2	1293.51	1273	1563.45	1173.06	1366.35	987.412	1220.78	1753.54
